# Supplementary material for: A Five-Gene-Pair-Based Prognostic Signature for Predicting the Relapse Risk of Early Stage ER+ Breast Cancer
Source: Front Genet. 2020 Oct 29;11:566928. doi: 10.3389/fgene.2020.566928 (PMC7658391; doi:10.3389/fgene.2020.566928)
Supplement: Supplementary file 4 [file Table_4.XLSX]

## Sheet: Sheet1
Supplementary Table S4. The deatail information of REO equation for metastasis-related gene pairs
Gene Pair*		Three datasets measured by the Affymetrix’s microarray platform								Data measured by the Illumina’s microarray platform
Entrze gene ID		Non-metastasis samples				Metastasis samples				Non-metastasis samples				Metastasis samples
Gene A	Gene B	k	n	p value	adjust p	k	n	p value	adjust p	k	n	p value	adjust p	k	n	p value	adjust p
30	9232	73	105	4.31789e-06	4.9874e-06	63	101	0.0252211	0.0266484	108	184	0.0110176	0.0115594	66	99	0.000592616	0.000654728
72	79726	72	105	1.11848e-05	1.28222e-05	64	101	0.0156509	0.0166332	108	184	0.0110176	0.0115594	60	99	0.0219376	0.0232981
72	79894	66	105	0.00132689	0.00145842	71	101	0.00019535	0.000216795	107	184	0.0161212	0.0168581	60	99	0.0219376	0.0232981
97	22974	68	105	0.000320624	0.000357209	74	101	1.63777e-05	1.85491e-05	110	184	0.00484178	0.00511387	66	99	0.000592616	0.000654728
125	916	72	105	1.11848e-05	1.28222e-05	72	101	8.91786e-05	9.96279e-05	110	184	0.00484178	0.00511387	59	99	0.0349503	0.036885
125	1606	72	105	1.11848e-05	1.28222e-05	79	101	1.08293e-07	1.27345e-07	104	184	0.0448459	0.0464374	60	99	0.0219376	0.0232981
125	4012	62	105	0.0140447	0.0150406	71	101	0.00019535	0.000216795	104	184	0.0448459	0.0464374	61	99	0.0132626	0.0141749
125	6712	75	105	5.57748e-07	6.54351e-07	79	101	1.08293e-07	1.27345e-07	104	184	0.0448459	0.0464374	62	99	0.00771618	0.00830041
125	7112	77	105	5.9034e-08	7.04091e-08	67	101	0.00300804	0.00325475	122	184	5.7669e-06	6.35241e-06	60	99	0.0219376	0.0232981
125	8438	76	105	1.86157e-07	2.20183e-07	73	101	3.90421e-05	4.39132e-05	106	184	0.0231224	0.0240998	60	99	0.0219376	0.0232981
125	9465	66	105	0.00132689	0.00145842	65	101	0.00937046	0.0100175	110	184	0.00484178	0.00511387	61	99	0.0132626	0.0141749
132	9700	66	105	0.00132689	0.00145842	91	101	2.66454e-15	3.54344e-15	106	184	0.0231224	0.0240998	61	99	0.0132626	0.0141749
132	79019	79	105	5.06067e-09	6.14292e-09	79	101	1.08293e-07	1.27345e-07	113	184	0.00120708	0.00128795	65	99	0.00119731	0.00131381
150	11066	66	105	0.00132689	0.00145842	65	101	0.00937046	0.0100175	104	184	0.0448459	0.0464374	60	99	0.0219376	0.0232981
150	11119	66	105	0.00132689	0.00145842	70	101	0.000410726	0.000452856	105	184	0.0325163	0.0337801	59	99	0.0349503	0.036885
150	79690	74	105	1.58994e-06	1.85065e-06	74	101	1.63777e-05	1.85491e-05	113	184	0.00120708	0.00128795	65	99	0.00119731	0.00131381
150	84619	67	105	0.000665913	0.000736853	64	101	0.0156509	0.0166332	112	184	0.00195873	0.00208281	60	99	0.0219376	0.0232981
178	55771	69	105	0.00014798	0.000166015	62	101	0.0392425	0.0412253	117	184	0.000140311	0.000151805	61	99	0.0132626	0.0141749
185	489	63	105	0.00825293	0.00889484	66	101	0.00540895	0.00581717	115	184	0.00042987	0.000461845	59	99	0.0349503	0.036885
185	5979	60	105	0.0363785	0.0384681	64	101	0.0156509	0.0166332	108	184	0.0110176	0.0115594	63	99	0.00431679	0.00467401
185	9651	67	105	0.000665913	0.000736853	62	101	0.0392425	0.0412253	108	184	0.0110176	0.0115594	61	99	0.0132626	0.0141749
185	9914	69	105	0.00014798	0.000166015	63	101	0.0252211	0.0266484	106	184	0.0231224	0.0240998	60	99	0.0219376	0.0232981
185	23094	65	105	0.00253869	0.00277197	64	101	0.0156509	0.0166332	106	184	0.0231224	0.0240998	62	99	0.00771618	0.00830041
185	54101	63	105	0.00825293	0.00889484	64	101	0.0156509	0.0166332	110	184	0.00484178	0.00511387	59	99	0.0349503	0.036885
185	56833	61	105	0.023022	0.0244983	67	101	0.00300804	0.00325475	105	184	0.0325163	0.0337801	62	99	0.00771618	0.00830041
185	81620	70	105	6.54112e-05	7.39024e-05	67	101	0.00300804	0.00325475	106	184	0.0231224	0.0240998	61	99	0.0132626	0.0141749
306	6495	75	105	5.57748e-07	6.54351e-07	64	101	0.0156509	0.0166332	106	184	0.0231224	0.0240998	59	99	0.0349503	0.036885
306	8347	65	105	0.00253869	0.00277197	69	101	0.000829513	0.000908777	104	184	0.0448459	0.0464374	59	99	0.0349503	0.036885
311	11065	60	105	0.0363785	0.0384681	83	101	8.08977e-10	9.84799e-10	104	184	0.0448459	0.0464374	67	99	0.000281104	0.000312729
318	2932	78	105	1.77603e-08	2.13665e-08	64	101	0.0156509	0.0166332	110	184	0.00484178	0.00511387	59	99	0.0349503	0.036885
318	5684	76	105	1.86157e-07	2.20183e-07	69	101	0.000829513	0.000908777	105	184	0.0325163	0.0337801	61	99	0.0132626	0.0141749
334	2810	62	105	0.0140447	0.0150406	67	101	0.00300804	0.00325475	112	184	0.00195873	0.00208281	66	99	0.000592616	0.000654728
334	3665	77	105	5.9034e-08	7.04091e-08	66	101	0.00540895	0.00581717	107	184	0.0161212	0.0168581	64	99	0.00232033	0.00252904
334	11065	71	105	2.76654e-05	3.14833e-05	62	101	0.0392425	0.0412253	118	184	7.75427e-05	8.4191e-05	68	99	0.000127673	0.000143044
334	79888	61	105	0.023022	0.0244983	71	101	0.00019535	0.000216795	107	184	0.0161212	0.0168581	68	99	0.000127673	0.000143044
355	157680	68	105	0.000320624	0.000357209	71	101	0.00019535	0.000216795	104	184	0.0448459	0.0464374	60	99	0.0219376	0.0232981
379	6343	62	105	0.0140447	0.0150406	77	101	9.26738e-07	1.07285e-06	109	184	0.00737886	0.00776747	60	99	0.0219376	0.0232981
398	4656	60	105	0.0363785	0.0384681	79	101	1.08293e-07	1.27345e-07	106	184	0.0231224	0.0240998	59	99	0.0349503	0.036885
398	55220	63	105	0.00825293	0.00889484	68	101	0.00161049	0.00175337	110	184	0.00484178	0.00511387	62	99	0.00771618	0.00830041
403	83451	72	105	1.11848e-05	1.28222e-05	70	101	0.000410726	0.000452856	123	184	2.84251e-06	3.14271e-06	61	99	0.0132626	0.0141749
477	2688	71	105	2.76654e-05	3.14833e-05	70	101	0.000410726	0.000452856	104	184	0.0448459	0.0464374	63	99	0.00431679	0.00467401
477	2692	73	105	4.31789e-06	4.9874e-06	65	101	0.00937046	0.0100175	109	184	0.00737886	0.00776747	59	99	0.0349503	0.036885
477	2835	77	105	5.9034e-08	7.04091e-08	67	101	0.00300804	0.00325475	104	184	0.0448459	0.0464374	59	99	0.0349503	0.036885
477	2853	64	105	0.00466752	0.00506319	83	101	8.08977e-10	9.84799e-10	109	184	0.00737886	0.00776747	60	99	0.0219376	0.0232981
477	3046	69	105	0.00014798	0.000166015	81	101	1.03899e-08	1.24234e-08	109	184	0.00737886	0.00776747	65	99	0.00119731	0.00131381
477	3049	62	105	0.0140447	0.0150406	80	101	3.44038e-08	4.07902e-08	106	184	0.0231224	0.0240998	66	99	0.000592616	0.000654728
477	3938	66	105	0.00132689	0.00145842	68	101	0.00161049	0.00175337	113	184	0.00120708	0.00128795	64	99	0.00232033	0.00252904
477	5680	64	105	0.00466752	0.00506319	75	101	6.57684e-06	7.50204e-06	113	184	0.00120708	0.00128795	62	99	0.00771618	0.00830041
477	6336	76	105	1.86157e-07	2.20183e-07	64	101	0.0156509	0.0166332	107	184	0.0161212	0.0168581	68	99	0.000127673	0.000143044
477	6346	79	105	5.06067e-09	6.14292e-09	62	101	0.0392425	0.0412253	107	184	0.0161212	0.0168581	62	99	0.00771618	0.00830041
477	6559	65	105	0.00253869	0.00277197	79	101	1.08293e-07	1.27345e-07	110	184	0.00484178	0.00511387	68	99	0.000127673	0.000143044
477	6694	65	105	0.00253869	0.00277197	82	101	2.97825e-09	3.59257e-09	107	184	0.0161212	0.0168581	61	99	0.0132626	0.0141749
477	6953	64	105	0.00466752	0.00506319	84	101	2.07852e-10	2.55444e-10	107	184	0.0161212	0.0168581	64	99	0.00232033	0.00252904
477	7638	60	105	0.0363785	0.0384681	74	101	1.63777e-05	1.85491e-05	116	184	0.000248309	0.000267709	59	99	0.0349503	0.036885
477	8739	78	105	1.77603e-08	2.13665e-08	64	101	0.0156509	0.0166332	105	184	0.0325163	0.0337801	63	99	0.00431679	0.00467401
477	8787	72	105	1.11848e-05	1.28222e-05	68	101	0.00161049	0.00175337	106	184	0.0231224	0.0240998	60	99	0.0219376	0.0232981
477	9856	68	105	0.000320624	0.000357209	75	101	6.57684e-06	7.50204e-06	104	184	0.0448459	0.0464374	60	99	0.0219376	0.0232981
477	10369	69	105	0.00014798	0.000166015	76	101	2.52582e-06	2.90225e-06	106	184	0.0231224	0.0240998	60	99	0.0219376	0.0232981
477	27156	70	105	6.54112e-05	7.39024e-05	68	101	0.00161049	0.00175337	117	184	0.000140311	0.000151805	62	99	0.00771618	0.00830041
477	51297	61	105	0.023022	0.0244983	87	101	2.47313e-12	3.13477e-12	106	184	0.0231224	0.0240998	59	99	0.0349503	0.036885
477	51725	68	105	0.000320624	0.000357209	69	101	0.000829513	0.000908777	106	184	0.0231224	0.0240998	62	99	0.00771618	0.00830041
477	54827	76	105	1.86157e-07	2.20183e-07	67	101	0.00300804	0.00325475	104	184	0.0448459	0.0464374	62	99	0.00771618	0.00830041
477	56269	76	105	1.86157e-07	2.20183e-07	65	101	0.00937046	0.0100175	104	184	0.0448459	0.0464374	72	99	3.45035e-06	3.98241e-06
477	60529	61	105	0.023022	0.0244983	80	101	3.44038e-08	4.07902e-08	112	184	0.00195873	0.00208281	62	99	0.00771618	0.00830041
477	64100	72	105	1.11848e-05	1.28222e-05	78	101	3.24486e-07	3.78549e-07	110	184	0.00484178	0.00511387	63	99	0.00431679	0.00467401
477	81850	65	105	0.00253869	0.00277197	77	101	9.26738e-07	1.07285e-06	104	184	0.0448459	0.0464374	62	99	0.00771618	0.00830041
486	5453	63	105	0.00825293	0.00889484	63	101	0.0252211	0.0266484	104	184	0.0448459	0.0464374	59	99	0.0349503	0.036885
490	9969	69	105	0.00014798	0.000166015	68	101	0.00161049	0.00175337	122	184	5.7669e-06	6.35241e-06	61	99	0.0132626	0.0141749
528	9700	83	105	1.8644e-11	2.35492e-11	62	101	0.0392425	0.0412253	106	184	0.0231224	0.0240998	61	99	0.0132626	0.0141749
538	51514	70	105	6.54112e-05	7.39024e-05	63	101	0.0252211	0.0266484	111	184	0.00311195	0.00329793	59	99	0.0349503	0.036885
538	79703	61	105	0.023022	0.0244983	76	101	2.52582e-06	2.90225e-06	104	184	0.0448459	0.0464374	61	99	0.0132626	0.0141749
552	3195	63	105	0.00825293	0.00889484	85	101	5.0415e-11	6.25788e-11	105	184	0.0325163	0.0337801	60	99	0.0219376	0.0232981
552	8997	64	105	0.00466752	0.00506319	88	101	4.97602e-13	6.37782e-13	104	184	0.0448459	0.0464374	60	99	0.0219376	0.0232981
573	3226	64	105	0.00466752	0.00506319	69	101	0.000829513	0.000908777	110	184	0.00484178	0.00511387	61	99	0.0132626	0.0141749
585	1717	67	105	0.000665913	0.000736853	71	101	0.00019535	0.000216795	115	184	0.00042987	0.000461845	62	99	0.00771618	0.00830041
594	1515	73	105	4.31789e-06	4.9874e-06	62	101	0.0392425	0.0412253	114	184	0.00072815	0.000779611	59	99	0.0349503	0.036885
594	55765	70	105	6.54112e-05	7.39024e-05	66	101	0.00540895	0.00581717	106	184	0.0231224	0.0240998	61	99	0.0132626	0.0141749
597	6899	64	105	0.00466752	0.00506319	72	101	8.91786e-05	9.96279e-05	109	184	0.00737886	0.00776747	61	99	0.0132626	0.0141749
607	7083	66	105	0.00132689	0.00145842	63	101	0.0252211	0.0266484	106	184	0.0231224	0.0240998	63	99	0.00431679	0.00467401
657	79019	67	105	0.000665913	0.000736853	78	101	3.24486e-07	3.78549e-07	105	184	0.0325163	0.0337801	61	99	0.0132626	0.0141749
659	4913	62	105	0.0140447	0.0150406	65	101	0.00937046	0.0100175	105	184	0.0325163	0.0337801	60	99	0.0219376	0.0232981
683	255057	73	105	4.31789e-06	4.9874e-06	66	101	0.00540895	0.00581717	116	184	0.000248309	0.000267709	59	99	0.0349503	0.036885
686	51231	63	105	0.00825293	0.00889484	77	101	9.26738e-07	1.07285e-06	105	184	0.0325163	0.0337801	60	99	0.0219376	0.0232981
686	51477	74	105	1.58994e-06	1.85065e-06	74	101	1.63777e-05	1.85491e-05	105	184	0.0325163	0.0337801	64	99	0.00232033	0.00252904
727	26233	64	105	0.00466752	0.00506319	67	101	0.00300804	0.00325475	113	184	0.00120708	0.00128795	61	99	0.0132626	0.0141749
729	7932	76	105	1.86157e-07	2.20183e-07	64	101	0.0156509	0.0166332	109	184	0.00737886	0.00776747	59	99	0.0349503	0.036885
733	651	62	105	0.0140447	0.0150406	67	101	0.00300804	0.00325475	112	184	0.00195873	0.00208281	61	99	0.0132626	0.0141749
757	6199	65	105	0.00253869	0.00277197	78	101	3.24486e-07	3.78549e-07	104	184	0.0448459	0.0464374	60	99	0.0219376	0.0232981
761	6783	62	105	0.0140447	0.0150406	77	101	9.26738e-07	1.07285e-06	105	184	0.0325163	0.0337801	59	99	0.0349503	0.036885
762	53637	70	105	6.54112e-05	7.39024e-05	72	101	8.91786e-05	9.96279e-05	108	184	0.0110176	0.0115594	61	99	0.0132626	0.0141749
857	8535	83	105	1.8644e-11	2.35492e-11	65	101	0.00937046	0.0100175	104	184	0.0448459	0.0464374	62	99	0.00771618	0.00830041
858	5054	63	105	0.00825293	0.00889484	79	101	1.08293e-07	1.27345e-07	126	184	2.95193e-07	3.30073e-07	59	99	0.0349503	0.036885
889	22974	64	105	0.00466752	0.00506319	81	101	1.03899e-08	1.24234e-08	108	184	0.0110176	0.0115594	69	99	5.54702e-05	6.25983e-05
901	11065	65	105	0.00253869	0.00277197	84	101	2.07852e-10	2.55444e-10	110	184	0.00484178	0.00511387	61	99	0.0132626	0.0141749
905	2305	64	105	0.00466752	0.00506319	85	101	5.0415e-11	6.25788e-11	106	184	0.0231224	0.0240998	64	99	0.00232033	0.00252904
905	54531	65	105	0.00253869	0.00277197	80	101	3.44038e-08	4.07902e-08	115	184	0.00042987	0.000461845	60	99	0.0219376	0.0232981
947	3833	70	105	6.54112e-05	7.39024e-05	72	101	8.91786e-05	9.96279e-05	114	184	0.00072815	0.000779611	59	99	0.0349503	0.036885
947	10460	81	105	3.46546e-10	4.28701e-10	65	101	0.00937046	0.0100175	116	184	0.000248309	0.000267709	59	99	0.0349503	0.036885
947	22974	63	105	0.00825293	0.00889484	72	101	8.91786e-05	9.96279e-05	117	184	0.000140311	0.000151805	59	99	0.0349503	0.036885
947	112869	62	105	0.0140447	0.0150406	62	101	0.0392425	0.0412253	108	184	0.0110176	0.0115594	60	99	0.0219376	0.0232981
961	2539	61	105	0.023022	0.0244983	82	101	2.97825e-09	3.59257e-09	106	184	0.0231224	0.0240998	62	99	0.00771618	0.00830041
966	7531	69	105	0.00014798	0.000166015	62	101	0.0392425	0.0412253	119	184	4.19033e-05	4.56583e-05	66	99	0.000592616	0.000654728
966	220988	70	105	6.54112e-05	7.39024e-05	64	101	0.0156509	0.0166332	115	184	0.00042987	0.000461845	65	99	0.00119731	0.00131381
1003	10025	61	105	0.023022	0.0244983	66	101	0.00540895	0.00581717	106	184	0.0231224	0.0240998	60	99	0.0219376	0.0232981
1021	26233	69	105	0.00014798	0.000166015	70	101	0.000410726	0.000452856	104	184	0.0448459	0.0464374	65	99	0.00119731	0.00131381
1036	1742	67	105	0.000665913	0.000736853	68	101	0.00161049	0.00175337	113	184	0.00120708	0.00128795	59	99	0.0349503	0.036885
1036	55176	64	105	0.00466752	0.00506319	92	101	4.44089e-16	5.98775e-16	104	184	0.0448459	0.0464374	60	99	0.0219376	0.0232981
1036	56992	67	105	0.000665913	0.000736853	65	101	0.00937046	0.0100175	109	184	0.00737886	0.00776747	60	99	0.0219376	0.0232981
1036	78986	62	105	0.0140447	0.0150406	84	101	2.07852e-10	2.55444e-10	105	184	0.0325163	0.0337801	60	99	0.0219376	0.0232981
1117	51512	63	105	0.00825293	0.00889484	62	101	0.0392425	0.0412253	109	184	0.00737886	0.00776747	60	99	0.0219376	0.0232981
1147	51016	68	105	0.000320624	0.000357209	62	101	0.0392425	0.0412253	107	184	0.0161212	0.0168581	59	99	0.0349503	0.036885
1149	3762	61	105	0.023022	0.0244983	73	101	3.90421e-05	4.39132e-05	120	184	2.21368e-05	2.42074e-05	59	99	0.0349503	0.036885
1185	5347	84	105	3.92597e-12	5.01401e-12	63	101	0.0252211	0.0266484	111	184	0.00311195	0.00329793	60	99	0.0219376	0.0232981
1193	24137	68	105	0.000320624	0.000357209	81	101	1.03899e-08	1.24234e-08	106	184	0.0231224	0.0240998	61	99	0.0132626	0.0141749
1203	51128	65	105	0.00253869	0.00277197	70	101	0.000410726	0.000452856	104	184	0.0448459	0.0464374	61	99	0.0132626	0.0141749
1266	16	71	105	2.76654e-05	3.14833e-05	82	101	2.97825e-09	3.59257e-09	104	184	0.0448459	0.0464374	62	99	0.00771618	0.00830041
1266	5050	81	105	3.46546e-10	4.28701e-10	71	101	0.00019535	0.000216795	104	184	0.0448459	0.0464374	61	99	0.0132626	0.0141749
1266	9130	75	105	5.57748e-07	6.54351e-07	72	101	8.91786e-05	9.96279e-05	110	184	0.00484178	0.00511387	59	99	0.0349503	0.036885
1266	10262	71	105	2.76654e-05	3.14833e-05	84	101	2.07852e-10	2.55444e-10	107	184	0.0161212	0.0168581	60	99	0.0219376	0.0232981
1266	23623	77	105	5.9034e-08	7.04091e-08	82	101	2.97825e-09	3.59257e-09	120	184	2.21368e-05	2.42074e-05	59	99	0.0349503	0.036885
1266	192286	78	105	1.77603e-08	2.13665e-08	63	101	0.0252211	0.0266484	109	184	0.00737886	0.00776747	59	99	0.0349503	0.036885
1307	207	61	105	0.023022	0.0244983	69	101	0.000829513	0.000908777	108	184	0.0110176	0.0115594	60	99	0.0219376	0.0232981
1307	11047	68	105	0.000320624	0.000357209	63	101	0.0252211	0.0266484	111	184	0.00311195	0.00329793	67	99	0.000281104	0.000312729
1353	55203	66	105	0.00132689	0.00145842	73	101	3.90421e-05	4.39132e-05	111	184	0.00311195	0.00329793	59	99	0.0349503	0.036885
1385	404093	60	105	0.0363785	0.0384681	64	101	0.0156509	0.0166332	108	184	0.0110176	0.0115594	61	99	0.0132626	0.0141749
1410	9055	63	105	0.00825293	0.00889484	66	101	0.00540895	0.00581717	106	184	0.0231224	0.0240998	60	99	0.0219376	0.0232981
1429	9232	71	105	2.76654e-05	3.14833e-05	70	101	0.000410726	0.000452856	110	184	0.00484178	0.00511387	62	99	0.00771618	0.00830041
1456	51514	66	105	0.00132689	0.00145842	73	101	3.90421e-05	4.39132e-05	107	184	0.0161212	0.0168581	63	99	0.00431679	0.00467401
1496	5275	72	105	1.11848e-05	1.28222e-05	65	101	0.00937046	0.0100175	121	184	1.143e-05	1.25445e-05	59	99	0.0349503	0.036885
1510	6698	61	105	0.023022	0.0244983	78	101	3.24486e-07	3.78549e-07	119	184	4.19033e-05	4.56583e-05	59	99	0.0349503	0.036885
1519	1365	61	105	0.023022	0.0244983	74	101	1.63777e-05	1.85491e-05	108	184	0.0110176	0.0115594	60	99	0.0219376	0.0232981
1519	6723	71	105	2.76654e-05	3.14833e-05	71	101	0.00019535	0.000216795	104	184	0.0448459	0.0464374	59	99	0.0349503	0.036885
1558	6699	61	105	0.023022	0.0244983	72	101	8.91786e-05	9.96279e-05	112	184	0.00195873	0.00208281	61	99	0.0132626	0.0141749
1565	25992	63	105	0.00825293	0.00889484	71	101	0.00019535	0.000216795	111	184	0.00311195	0.00329793	60	99	0.0219376	0.0232981
1565	54905	67	105	0.000665913	0.000736853	74	101	1.63777e-05	1.85491e-05	105	184	0.0325163	0.0337801	67	99	0.000281104	0.000312729
1580	770	65	105	0.00253869	0.00277197	63	101	0.0252211	0.0266484	107	184	0.0161212	0.0168581	60	99	0.0219376	0.0232981
1580	2011	63	105	0.00825293	0.00889484	72	101	8.91786e-05	9.96279e-05	109	184	0.00737886	0.00776747	63	99	0.00431679	0.00467401
1580	79364	61	105	0.023022	0.0244983	71	101	0.00019535	0.000216795	109	184	0.00737886	0.00776747	59	99	0.0349503	0.036885
1580	90379	78	105	1.77603e-08	2.13665e-08	62	101	0.0392425	0.0412253	106	184	0.0231224	0.0240998	59	99	0.0349503	0.036885
1677	9156	67	105	0.000665913	0.000736853	62	101	0.0392425	0.0412253	121	184	1.143e-05	1.25445e-05	63	99	0.00431679	0.00467401
1737	9833	63	105	0.00825293	0.00889484	69	101	0.000829513	0.000908777	113	184	0.00120708	0.00128795	59	99	0.0349503	0.036885
1781	51337	65	105	0.00253869	0.00277197	82	101	2.97825e-09	3.59257e-09	105	184	0.0325163	0.0337801	68	99	0.000127673	0.000143044
1802	22974	66	105	0.00132689	0.00145842	62	101	0.0392425	0.0412253	106	184	0.0231224	0.0240998	60	99	0.0219376	0.0232981
1842	23464	60	105	0.0363785	0.0384681	80	101	3.44038e-08	4.07902e-08	104	184	0.0448459	0.0464374	60	99	0.0219376	0.0232981
1942	8991	72	105	1.11848e-05	1.28222e-05	62	101	0.0392425	0.0412253	120	184	2.21368e-05	2.42074e-05	60	99	0.0219376	0.0232981
1950	4796	66	105	0.00132689	0.00145842	72	101	8.91786e-05	9.96279e-05	105	184	0.0325163	0.0337801	61	99	0.0132626	0.0141749
1950	9080	61	105	0.023022	0.0244983	69	101	0.000829513	0.000908777	105	184	0.0325163	0.0337801	62	99	0.00771618	0.00830041
1950	10220	66	105	0.00132689	0.00145842	65	101	0.00937046	0.0100175	108	184	0.0110176	0.0115594	62	99	0.00771618	0.00830041
1955	5877	68	105	0.000320624	0.000357209	74	101	1.63777e-05	1.85491e-05	111	184	0.00311195	0.00329793	59	99	0.0349503	0.036885
1955	7343	73	105	4.31789e-06	4.9874e-06	71	101	0.00019535	0.000216795	105	184	0.0325163	0.0337801	59	99	0.0349503	0.036885
1955	22888	74	105	1.58994e-06	1.85065e-06	72	101	8.91786e-05	9.96279e-05	104	184	0.0448459	0.0464374	60	99	0.0219376	0.0232981
2009	332	63	105	0.00825293	0.00889484	65	101	0.00937046	0.0100175	109	184	0.00737886	0.00776747	61	99	0.0132626	0.0141749
2037	83461	66	105	0.00132689	0.00145842	64	101	0.0156509	0.0166332	104	184	0.0448459	0.0464374	65	99	0.00119731	0.00131381
2039	9401	60	105	0.0363785	0.0384681	66	101	0.00540895	0.00581717	104	184	0.0448459	0.0464374	60	99	0.0219376	0.0232981
2051	25806	61	105	0.023022	0.0244983	67	101	0.00300804	0.00325475	112	184	0.00195873	0.00208281	60	99	0.0219376	0.0232981
2055	1263	63	105	0.00825293	0.00889484	68	101	0.00161049	0.00175337	125	184	6.43267e-07	7.16541e-07	60	99	0.0219376	0.0232981
2055	6712	63	105	0.00825293	0.00889484	72	101	8.91786e-05	9.96279e-05	106	184	0.0231224	0.0240998	66	99	0.000592616	0.000654728
2060	5900	67	105	0.000665913	0.000736853	74	101	1.63777e-05	1.85491e-05	106	184	0.0231224	0.0240998	63	99	0.00431679	0.00467401
2060	11065	76	105	1.86157e-07	2.20183e-07	74	101	1.63777e-05	1.85491e-05	113	184	0.00120708	0.00128795	65	99	0.00119731	0.00131381
2060	26073	72	105	1.11848e-05	1.28222e-05	76	101	2.52582e-06	2.90225e-06	104	184	0.0448459	0.0464374	63	99	0.00431679	0.00467401
2060	55365	70	105	6.54112e-05	7.39024e-05	74	101	1.63777e-05	1.85491e-05	112	184	0.00195873	0.00208281	61	99	0.0132626	0.0141749
2060	56005	61	105	0.023022	0.0244983	84	101	2.07852e-10	2.55444e-10	107	184	0.0161212	0.0168581	63	99	0.00431679	0.00467401
2101	10460	78	105	1.77603e-08	2.13665e-08	72	101	8.91786e-05	9.96279e-05	114	184	0.00072815	0.000779611	61	99	0.0132626	0.0141749
2101	22974	60	105	0.0363785	0.0384681	75	101	6.57684e-06	7.50204e-06	113	184	0.00120708	0.00128795	60	99	0.0219376	0.0232981
2121	79075	60	105	0.0363785	0.0384681	67	101	0.00300804	0.00325475	105	184	0.0325163	0.0337801	67	99	0.000281104	0.000312729
2167	705	61	105	0.023022	0.0244983	88	101	4.97602e-13	6.37782e-13	108	184	0.0110176	0.0115594	59	99	0.0349503	0.036885
2167	1212	64	105	0.00466752	0.00506319	74	101	1.63777e-05	1.85491e-05	107	184	0.0161212	0.0168581	59	99	0.0349503	0.036885
2167	4913	62	105	0.0140447	0.0150406	67	101	0.00300804	0.00325475	105	184	0.0325163	0.0337801	64	99	0.00232033	0.00252904
2167	6050	68	105	0.000320624	0.000357209	69	101	0.000829513	0.000908777	106	184	0.0231224	0.0240998	62	99	0.00771618	0.00830041
2167	6598	72	105	1.11848e-05	1.28222e-05	62	101	0.0392425	0.0412253	108	184	0.0110176	0.0115594	61	99	0.0132626	0.0141749
2167	6667	60	105	0.0363785	0.0384681	80	101	3.44038e-08	4.07902e-08	106	184	0.0231224	0.0240998	60	99	0.0219376	0.0232981
2167	6839	71	105	2.76654e-05	3.14833e-05	64	101	0.0156509	0.0166332	107	184	0.0161212	0.0168581	61	99	0.0132626	0.0141749
2167	7022	61	105	0.023022	0.0244983	86	101	1.15188e-11	1.44453e-11	105	184	0.0325163	0.0337801	59	99	0.0349503	0.036885
2167	7064	66	105	0.00132689	0.00145842	66	101	0.00540895	0.00581717	109	184	0.00737886	0.00776747	60	99	0.0219376	0.0232981
2167	7083	65	105	0.00253869	0.00277197	74	101	1.63777e-05	1.85491e-05	108	184	0.0110176	0.0115594	64	99	0.00232033	0.00252904
2167	7298	71	105	2.76654e-05	3.14833e-05	63	101	0.0252211	0.0266484	105	184	0.0325163	0.0337801	63	99	0.00431679	0.00467401
2167	8140	63	105	0.00825293	0.00889484	82	101	2.97825e-09	3.59257e-09	105	184	0.0325163	0.0337801	65	99	0.00119731	0.00131381
2167	8678	61	105	0.023022	0.0244983	74	101	1.63777e-05	1.85491e-05	104	184	0.0448459	0.0464374	64	99	0.00232033	0.00252904
2167	9214	63	105	0.00825293	0.00889484	84	101	2.07852e-10	2.55444e-10	111	184	0.00311195	0.00329793	59	99	0.0349503	0.036885
2167	9546	65	105	0.00253869	0.00277197	76	101	2.52582e-06	2.90225e-06	107	184	0.0161212	0.0168581	60	99	0.0219376	0.0232981
2167	9580	68	105	0.000320624	0.000357209	75	101	6.57684e-06	7.50204e-06	111	184	0.00311195	0.00329793	61	99	0.0132626	0.0141749
2167	9806	75	105	5.57748e-07	6.54351e-07	65	101	0.00937046	0.0100175	108	184	0.0110176	0.0115594	59	99	0.0349503	0.036885
2167	10682	71	105	2.76654e-05	3.14833e-05	66	101	0.00540895	0.00581717	114	184	0.00072815	0.000779611	61	99	0.0132626	0.0141749
2167	11322	61	105	0.023022	0.0244983	84	101	2.07852e-10	2.55444e-10	110	184	0.00484178	0.00511387	60	99	0.0219376	0.0232981
2167	11338	73	105	4.31789e-06	4.9874e-06	62	101	0.0392425	0.0412253	108	184	0.0110176	0.0115594	59	99	0.0349503	0.036885
2167	22880	65	105	0.00253869	0.00277197	74	101	1.63777e-05	1.85491e-05	110	184	0.00484178	0.00511387	60	99	0.0219376	0.0232981
2167	23517	68	105	0.000320624	0.000357209	69	101	0.000829513	0.000908777	105	184	0.0325163	0.0337801	60	99	0.0219376	0.0232981
2167	25837	63	105	0.00825293	0.00889484	72	101	8.91786e-05	9.96279e-05	109	184	0.00737886	0.00776747	59	99	0.0349503	0.036885
2167	25940	66	105	0.00132689	0.00145842	67	101	0.00300804	0.00325475	104	184	0.0448459	0.0464374	62	99	0.00771618	0.00830041
2167	26502	69	105	0.00014798	0.000166015	69	101	0.000829513	0.000908777	104	184	0.0448459	0.0464374	64	99	0.00232033	0.00252904
2167	27351	65	105	0.00253869	0.00277197	69	101	0.000829513	0.000908777	104	184	0.0448459	0.0464374	60	99	0.0219376	0.0232981
2167	51182	65	105	0.00253869	0.00277197	69	101	0.000829513	0.000908777	106	184	0.0231224	0.0240998	62	99	0.00771618	0.00830041
2167	51593	67	105	0.000665913	0.000736853	77	101	9.26738e-07	1.07285e-06	104	184	0.0448459	0.0464374	59	99	0.0349503	0.036885
2167	55846	72	105	1.11848e-05	1.28222e-05	66	101	0.00540895	0.00581717	104	184	0.0448459	0.0464374	65	99	0.00119731	0.00131381
2167	57761	67	105	0.000665913	0.000736853	77	101	9.26738e-07	1.07285e-06	109	184	0.00737886	0.00776747	65	99	0.00119731	0.00131381
2167	79007	73	105	4.31789e-06	4.9874e-06	65	101	0.00937046	0.0100175	108	184	0.0110176	0.0115594	60	99	0.0219376	0.0232981
2167	79035	62	105	0.0140447	0.0150406	79	101	1.08293e-07	1.27345e-07	114	184	0.00072815	0.000779611	60	99	0.0219376	0.0232981
2167	80023	63	105	0.00825293	0.00889484	78	101	3.24486e-07	3.78549e-07	112	184	0.00195873	0.00208281	59	99	0.0349503	0.036885
2180	11065	66	105	0.00132689	0.00145842	74	101	1.63777e-05	1.85491e-05	105	184	0.0325163	0.0337801	64	99	0.00232033	0.00252904
2195	51428	60	105	0.0363785	0.0384681	85	101	5.0415e-11	6.25788e-11	104	184	0.0448459	0.0464374	63	99	0.00431679	0.00467401
2196	51350	69	105	0.00014798	0.000166015	73	101	3.90421e-05	4.39132e-05	114	184	0.00072815	0.000779611	62	99	0.00771618	0.00830041
2196	54738	66	105	0.00132689	0.00145842	80	101	3.44038e-08	4.07902e-08	105	184	0.0325163	0.0337801	59	99	0.0349503	0.036885
2202	8631	64	105	0.00466752	0.00506319	68	101	0.00161049	0.00175337	107	184	0.0161212	0.0168581	63	99	0.00431679	0.00467401
2205	430	71	105	2.76654e-05	3.14833e-05	62	101	0.0392425	0.0412253	106	184	0.0231224	0.0240998	63	99	0.00431679	0.00467401
2205	3543	75	105	5.57748e-07	6.54351e-07	83	101	8.08977e-10	9.84799e-10	108	184	0.0110176	0.0115594	60	99	0.0219376	0.0232981
2205	6507	77	105	5.9034e-08	7.04091e-08	78	101	3.24486e-07	3.78549e-07	107	184	0.0161212	0.0168581	61	99	0.0132626	0.0141749
2247	2842	67	105	0.000665913	0.000736853	72	101	8.91786e-05	9.96279e-05	105	184	0.0325163	0.0337801	62	99	0.00771618	0.00830041
2273	833	70	105	6.54112e-05	7.39024e-05	62	101	0.0392425	0.0412253	104	184	0.0448459	0.0464374	59	99	0.0349503	0.036885
2273	55317	66	105	0.00132689	0.00145842	67	101	0.00300804	0.00325475	105	184	0.0325163	0.0337801	67	99	0.000281104	0.000312729
2281	54905	73	105	4.31789e-06	4.9874e-06	62	101	0.0392425	0.0412253	124	184	1.36842e-06	1.51858e-06	59	99	0.0349503	0.036885
2295	9156	74	105	1.58994e-06	1.85065e-06	73	101	3.90421e-05	4.39132e-05	106	184	0.0231224	0.0240998	61	99	0.0132626	0.0141749
2295	57332	67	105	0.000665913	0.000736853	84	101	2.07852e-10	2.55444e-10	107	184	0.0161212	0.0168581	63	99	0.00431679	0.00467401
2318	10241	61	105	0.023022	0.0244983	62	101	0.0392425	0.0412253	106	184	0.0231224	0.0240998	60	99	0.0219376	0.0232981
2444	4656	69	105	0.00014798	0.000166015	70	101	0.000410726	0.000452856	117	184	0.000140311	0.000151805	60	99	0.0219376	0.0232981
2526	29992	66	105	0.00132689	0.00145842	67	101	0.00300804	0.00325475	111	184	0.00311195	0.00329793	60	99	0.0219376	0.0232981
2526	55355	63	105	0.00825293	0.00889484	68	101	0.00161049	0.00175337	113	184	0.00120708	0.00128795	59	99	0.0349503	0.036885
2531	10553	65	105	0.00253869	0.00277197	73	101	3.90421e-05	4.39132e-05	111	184	0.00311195	0.00329793	61	99	0.0132626	0.0141749
2531	51659	69	105	0.00014798	0.000166015	75	101	6.57684e-06	7.50204e-06	120	184	2.21368e-05	2.42074e-05	60	99	0.0219376	0.0232981
2551	79075	63	105	0.00825293	0.00889484	87	101	2.47313e-12	3.13477e-12	107	184	0.0161212	0.0168581	59	99	0.0349503	0.036885
2581	55344	79	105	5.06067e-09	6.14292e-09	66	101	0.00540895	0.00581717	107	184	0.0161212	0.0168581	60	99	0.0219376	0.0232981
2639	22974	69	105	0.00014798	0.000166015	68	101	0.00161049	0.00175337	118	184	7.75427e-05	8.4191e-05	62	99	0.00771618	0.00830041
2690	5393	63	105	0.00825293	0.00889484	66	101	0.00540895	0.00581717	106	184	0.0231224	0.0240998	59	99	0.0349503	0.036885
2690	23464	67	105	0.000665913	0.000736853	69	101	0.000829513	0.000908777	112	184	0.00195873	0.00208281	60	99	0.0219376	0.0232981
2691	3018	63	105	0.00825293	0.00889484	79	101	1.08293e-07	1.27345e-07	108	184	0.0110176	0.0115594	62	99	0.00771618	0.00830041
2691	6792	61	105	0.023022	0.0244983	75	101	6.57684e-06	7.50204e-06	105	184	0.0325163	0.0337801	65	99	0.00119731	0.00131381
2691	9038	70	105	6.54112e-05	7.39024e-05	65	101	0.00937046	0.0100175	105	184	0.0325163	0.0337801	60	99	0.0219376	0.0232981
2691	26659	61	105	0.023022	0.0244983	67	101	0.00300804	0.00325475	109	184	0.00737886	0.00776747	62	99	0.00771618	0.00830041
2691	56269	62	105	0.0140447	0.0150406	76	101	2.52582e-06	2.90225e-06	118	184	7.75427e-05	8.4191e-05	64	99	0.00232033	0.00252904
2729	9088	62	105	0.0140447	0.0150406	91	101	2.66454e-15	3.54344e-15	125	184	6.43267e-07	7.16541e-07	59	99	0.0349503	0.036885
2729	55544	69	105	0.00014798	0.000166015	71	101	0.00019535	0.000216795	110	184	0.00484178	0.00511387	59	99	0.0349503	0.036885
2746	341	68	105	0.000320624	0.000357209	63	101	0.0252211	0.0266484	106	184	0.0231224	0.0240998	64	99	0.00232033	0.00252904
2764	5036	70	105	6.54112e-05	7.39024e-05	65	101	0.00937046	0.0100175	124	184	1.36842e-06	1.51858e-06	60	99	0.0219376	0.0232981
2773	11065	68	105	0.000320624	0.000357209	79	101	1.08293e-07	1.27345e-07	121	184	1.143e-05	1.25445e-05	64	99	0.00232033	0.00252904
2776	3964	76	105	1.86157e-07	2.20183e-07	70	101	0.000410726	0.000452856	105	184	0.0325163	0.0337801	60	99	0.0219376	0.0232981
2791	159	66	105	0.00132689	0.00145842	72	101	8.91786e-05	9.96279e-05	107	184	0.0161212	0.0168581	62	99	0.00771618	0.00830041
2791	22796	69	105	0.00014798	0.000166015	79	101	1.08293e-07	1.27345e-07	111	184	0.00311195	0.00329793	59	99	0.0349503	0.036885
2819	43	71	105	2.76654e-05	3.14833e-05	75	101	6.57684e-06	7.50204e-06	104	184	0.0448459	0.0464374	65	99	0.00119731	0.00131381
2819	286	73	105	4.31789e-06	4.9874e-06	70	101	0.000410726	0.000452856	107	184	0.0161212	0.0168581	64	99	0.00232033	0.00252904
2819	1053	62	105	0.0140447	0.0150406	90	101	1.64313e-14	2.15699e-14	105	184	0.0325163	0.0337801	64	99	0.00232033	0.00252904
2819	2169	74	105	1.58994e-06	1.85065e-06	62	101	0.0392425	0.0412253	108	184	0.0110176	0.0115594	64	99	0.00232033	0.00252904
2819	2626	65	105	0.00253869	0.00277197	73	101	3.90421e-05	4.39132e-05	119	184	4.19033e-05	4.56583e-05	65	99	0.00119731	0.00131381
2819	2843	63	105	0.00825293	0.00889484	74	101	1.63777e-05	1.85491e-05	106	184	0.0231224	0.0240998	59	99	0.0349503	0.036885
2819	3623	69	105	0.00014798	0.000166015	76	101	2.52582e-06	2.90225e-06	111	184	0.00311195	0.00329793	61	99	0.0132626	0.0141749
2819	3798	68	105	0.000320624	0.000357209	78	101	3.24486e-07	3.78549e-07	109	184	0.00737886	0.00776747	62	99	0.00771618	0.00830041
2819	3817	73	105	4.31789e-06	4.9874e-06	69	101	0.000829513	0.000908777	110	184	0.00484178	0.00511387	59	99	0.0349503	0.036885
2819	3975	74	105	1.58994e-06	1.85065e-06	78	101	3.24486e-07	3.78549e-07	104	184	0.0448459	0.0464374	66	99	0.000592616	0.000654728
2819	4010	62	105	0.0140447	0.0150406	92	101	4.44089e-16	5.98775e-16	105	184	0.0325163	0.0337801	65	99	0.00119731	0.00131381
2819	4843	66	105	0.00132689	0.00145842	82	101	2.97825e-09	3.59257e-09	110	184	0.00484178	0.00511387	63	99	0.00431679	0.00467401
2819	5076	65	105	0.00253869	0.00277197	62	101	0.0392425	0.0412253	107	184	0.0161212	0.0168581	64	99	0.00232033	0.00252904
2819	5139	60	105	0.0363785	0.0384681	63	101	0.0252211	0.0266484	108	184	0.0110176	0.0115594	59	99	0.0349503	0.036885
2819	6512	68	105	0.000320624	0.000357209	79	101	1.08293e-07	1.27345e-07	111	184	0.00311195	0.00329793	68	99	0.000127673	0.000143044
2819	7369	76	105	1.86157e-07	2.20183e-07	63	101	0.0252211	0.0266484	110	184	0.00484178	0.00511387	62	99	0.00771618	0.00830041
2819	7475	67	105	0.000665913	0.000736853	76	101	2.52582e-06	2.90225e-06	112	184	0.00195873	0.00208281	61	99	0.0132626	0.0141749
2819	7827	71	105	2.76654e-05	3.14833e-05	64	101	0.0156509	0.0166332	106	184	0.0231224	0.0240998	64	99	0.00232033	0.00252904
2819	9058	69	105	0.00014798	0.000166015	70	101	0.000410726	0.000452856	104	184	0.0448459	0.0464374	59	99	0.0349503	0.036885
2819	9173	66	105	0.00132689	0.00145842	72	101	8.91786e-05	9.96279e-05	119	184	4.19033e-05	4.56583e-05	64	99	0.00232033	0.00252904
2819	9390	66	105	0.00132689	0.00145842	74	101	1.63777e-05	1.85491e-05	111	184	0.00311195	0.00329793	61	99	0.0132626	0.0141749
2819	22953	66	105	0.00132689	0.00145842	83	101	8.08977e-10	9.84799e-10	109	184	0.00737886	0.00776747	65	99	0.00119731	0.00131381
2819	26280	75	105	5.57748e-07	6.54351e-07	66	101	0.00540895	0.00581717	110	184	0.00484178	0.00511387	63	99	0.00431679	0.00467401
2819	63876	62	105	0.0140447	0.0150406	87	101	2.47313e-12	3.13477e-12	110	184	0.00484178	0.00511387	62	99	0.00771618	0.00830041
2819	347853	79	105	5.06067e-09	6.14292e-09	63	101	0.0252211	0.0266484	108	184	0.0110176	0.0115594	62	99	0.00771618	0.00830041
2824	1130	61	105	0.023022	0.0244983	73	101	3.90421e-05	4.39132e-05	111	184	0.00311195	0.00329793	59	99	0.0349503	0.036885
2824	6495	60	105	0.0363785	0.0384681	64	101	0.0156509	0.0166332	114	184	0.00072815	0.000779611	59	99	0.0349503	0.036885
2824	8438	68	105	0.000320624	0.000357209	75	101	6.57684e-06	7.50204e-06	111	184	0.00311195	0.00329793	60	99	0.0219376	0.0232981
2824	54676	65	105	0.00253869	0.00277197	67	101	0.00300804	0.00325475	104	184	0.0448459	0.0464374	60	99	0.0219376	0.0232981
2830	189	68	105	0.000320624	0.000357209	81	101	1.03899e-08	1.24234e-08	113	184	0.00120708	0.00128795	62	99	0.00771618	0.00830041
2850	83451	64	105	0.00466752	0.00506319	62	101	0.0392425	0.0412253	117	184	0.000140311	0.000151805	60	99	0.0219376	0.0232981
2887	9088	70	105	6.54112e-05	7.39024e-05	68	101	0.00161049	0.00175337	107	184	0.0161212	0.0168581	65	99	0.00119731	0.00131381
2889	9700	68	105	0.000320624	0.000357209	74	101	1.63777e-05	1.85491e-05	109	184	0.00737886	0.00776747	61	99	0.0132626	0.0141749
2920	6698	60	105	0.0363785	0.0384681	72	101	8.91786e-05	9.96279e-05	113	184	0.00120708	0.00128795	70	99	2.30312e-05	2.61823e-05
2920	10880	66	105	0.00132689	0.00145842	73	101	3.90421e-05	4.39132e-05	108	184	0.0110176	0.0115594	62	99	0.00771618	0.00830041
2920	79814	61	105	0.023022	0.0244983	66	101	0.00540895	0.00581717	112	184	0.00195873	0.00208281	64	99	0.00232033	0.00252904
2934	6004	66	105	0.00132689	0.00145842	67	101	0.00300804	0.00325475	115	184	0.00042987	0.000461845	60	99	0.0219376	0.0232981
2947	7283	66	105	0.00132689	0.00145842	74	101	1.63777e-05	1.85491e-05	108	184	0.0110176	0.0115594	59	99	0.0349503	0.036885
2947	11065	68	105	0.000320624	0.000357209	80	101	3.44038e-08	4.07902e-08	119	184	4.19033e-05	4.56583e-05	63	99	0.00431679	0.00467401
2948	55222	63	105	0.00825293	0.00889484	68	101	0.00161049	0.00175337	107	184	0.0161212	0.0168581	60	99	0.0219376	0.0232981
2950	713	63	105	0.00825293	0.00889484	73	101	3.90421e-05	4.39132e-05	109	184	0.00737886	0.00776747	64	99	0.00232033	0.00252904
2954	9088	82	105	8.29385e-11	1.03643e-10	70	101	0.000410726	0.000452856	112	184	0.00195873	0.00208281	65	99	0.00119731	0.00131381
3000	10317	63	105	0.00825293	0.00889484	62	101	0.0392425	0.0412253	117	184	0.000140311	0.000151805	61	99	0.0132626	0.0141749
3000	23334	60	105	0.0363785	0.0384681	92	101	4.44089e-16	5.98775e-16	122	184	5.7669e-06	6.35241e-06	60	99	0.0219376	0.0232981
3037	627	68	105	0.000320624	0.000357209	70	101	0.000410726	0.000452856	108	184	0.0110176	0.0115594	59	99	0.0349503	0.036885
3037	23742	61	105	0.023022	0.0244983	72	101	8.91786e-05	9.96279e-05	114	184	0.00072815	0.000779611	64	99	0.00232033	0.00252904
3067	6688	67	105	0.000665913	0.000736853	74	101	1.63777e-05	1.85491e-05	104	184	0.0448459	0.0464374	60	99	0.0219376	0.0232981
3071	83461	65	105	0.00253869	0.00277197	62	101	0.0392425	0.0412253	111	184	0.00311195	0.00329793	59	99	0.0349503	0.036885
3073	8438	68	105	0.000320624	0.000357209	77	101	9.26738e-07	1.07285e-06	114	184	0.00072815	0.000779611	63	99	0.00431679	0.00467401
3087	79019	61	105	0.023022	0.0244983	69	101	0.000829513	0.000908777	110	184	0.00484178	0.00511387	59	99	0.0349503	0.036885
3131	993	67	105	0.000665913	0.000736853	78	101	3.24486e-07	3.78549e-07	104	184	0.0448459	0.0464374	65	99	0.00119731	0.00131381
3131	6698	77	105	5.9034e-08	7.04091e-08	68	101	0.00161049	0.00175337	117	184	0.000140311	0.000151805	65	99	0.00119731	0.00131381
3131	22806	63	105	0.00825293	0.00889484	83	101	8.08977e-10	9.84799e-10	105	184	0.0325163	0.0337801	62	99	0.00771618	0.00830041
3131	27033	60	105	0.0363785	0.0384681	87	101	2.47313e-12	3.13477e-12	108	184	0.0110176	0.0115594	64	99	0.00232033	0.00252904
3202	54972	71	105	2.76654e-05	3.14833e-05	62	101	0.0392425	0.0412253	109	184	0.00737886	0.00776747	62	99	0.00771618	0.00830041
3202	55344	71	105	2.76654e-05	3.14833e-05	72	101	8.91786e-05	9.96279e-05	109	184	0.00737886	0.00776747	67	99	0.000281104	0.000312729
3248	995	79	105	5.06067e-09	6.14292e-09	71	101	0.00019535	0.000216795	115	184	0.00042987	0.000461845	67	99	0.000281104	0.000312729
3248	3706	62	105	0.0140447	0.0150406	84	101	2.07852e-10	2.55444e-10	110	184	0.00484178	0.00511387	64	99	0.00232033	0.00252904
3248	5579	65	105	0.00253869	0.00277197	82	101	2.97825e-09	3.59257e-09	109	184	0.00737886	0.00776747	59	99	0.0349503	0.036885
3248	6036	70	105	6.54112e-05	7.39024e-05	63	101	0.0252211	0.0266484	109	184	0.00737886	0.00776747	60	99	0.0219376	0.0232981
3248	54901	61	105	0.023022	0.0244983	74	101	1.63777e-05	1.85491e-05	106	184	0.0231224	0.0240998	69	99	5.54702e-05	6.25983e-05
3249	22974	77	105	5.9034e-08	7.04091e-08	64	101	0.0156509	0.0166332	113	184	0.00120708	0.00128795	63	99	0.00431679	0.00467401
3250	1297	70	105	6.54112e-05	7.39024e-05	67	101	0.00300804	0.00325475	107	184	0.0161212	0.0168581	63	99	0.00431679	0.00467401
3250	2491	63	105	0.00825293	0.00889484	87	101	2.47313e-12	3.13477e-12	121	184	1.143e-05	1.25445e-05	60	99	0.0219376	0.0232981
3306	57130	64	105	0.00466752	0.00506319	72	101	8.91786e-05	9.96279e-05	105	184	0.0325163	0.0337801	60	99	0.0219376	0.0232981
3306	57804	65	105	0.00253869	0.00277197	65	101	0.00937046	0.0100175	112	184	0.00195873	0.00208281	64	99	0.00232033	0.00252904
3316	1827	60	105	0.0363785	0.0384681	64	101	0.0156509	0.0166332	107	184	0.0161212	0.0168581	60	99	0.0219376	0.0232981
3355	5078	60	105	0.0363785	0.0384681	79	101	1.08293e-07	1.27345e-07	104	184	0.0448459	0.0464374	59	99	0.0349503	0.036885
3397	3241	67	105	0.000665913	0.000736853	66	101	0.00540895	0.00581717	111	184	0.00311195	0.00329793	60	99	0.0219376	0.0232981
3397	4938	60	105	0.0363785	0.0384681	62	101	0.0392425	0.0412253	105	184	0.0325163	0.0337801	64	99	0.00232033	0.00252904
3397	7159	60	105	0.0363785	0.0384681	63	101	0.0252211	0.0266484	116	184	0.000248309	0.000267709	59	99	0.0349503	0.036885
3397	29127	61	105	0.023022	0.0244983	74	101	1.63777e-05	1.85491e-05	109	184	0.00737886	0.00776747	66	99	0.000592616	0.000654728
3417	9232	61	105	0.023022	0.0244983	72	101	8.91786e-05	9.96279e-05	110	184	0.00484178	0.00511387	59	99	0.0349503	0.036885
3420	1365	60	105	0.0363785	0.0384681	66	101	0.00540895	0.00581717	109	184	0.00737886	0.00776747	59	99	0.0349503	0.036885
3441	2491	75	105	5.57748e-07	6.54351e-07	62	101	0.0392425	0.0412253	112	184	0.00195873	0.00208281	60	99	0.0219376	0.0232981
3454	4173	62	105	0.0140447	0.0150406	80	101	3.44038e-08	4.07902e-08	104	184	0.0448459	0.0464374	59	99	0.0349503	0.036885
3614	22974	77	105	5.9034e-08	7.04091e-08	62	101	0.0392425	0.0412253	105	184	0.0325163	0.0337801	59	99	0.0349503	0.036885
3628	55009	61	105	0.023022	0.0244983	62	101	0.0392425	0.0412253	111	184	0.00311195	0.00329793	61	99	0.0132626	0.0141749
3630	2491	72	105	1.11848e-05	1.28222e-05	68	101	0.00161049	0.00175337	106	184	0.0231224	0.0240998	64	99	0.00232033	0.00252904
3652	55355	70	105	6.54112e-05	7.39024e-05	66	101	0.00540895	0.00581717	112	184	0.00195873	0.00208281	60	99	0.0219376	0.0232981
3680	6857	61	105	0.023022	0.0244983	64	101	0.0156509	0.0166332	105	184	0.0325163	0.0337801	62	99	0.00771618	0.00830041
3751	57405	60	105	0.0363785	0.0384681	71	101	0.00019535	0.000216795	115	184	0.00042987	0.000461845	63	99	0.00431679	0.00467401
3752	4656	62	105	0.0140447	0.0150406	76	101	2.52582e-06	2.90225e-06	105	184	0.0325163	0.0337801	61	99	0.0132626	0.0141749
3764	10112	61	105	0.023022	0.0244983	68	101	0.00161049	0.00175337	116	184	0.000248309	0.000267709	59	99	0.0349503	0.036885
3815	8416	64	105	0.00466752	0.00506319	67	101	0.00300804	0.00325475	108	184	0.0110176	0.0115594	63	99	0.00431679	0.00467401
3857	8608	74	105	1.58994e-06	1.85065e-06	64	101	0.0156509	0.0166332	108	184	0.0110176	0.0115594	61	99	0.0132626	0.0141749
3857	9156	69	105	0.00014798	0.000166015	68	101	0.00161049	0.00175337	116	184	0.000248309	0.000267709	59	99	0.0349503	0.036885
3908	11004	60	105	0.0363785	0.0384681	75	101	6.57684e-06	7.50204e-06	108	184	0.0110176	0.0115594	59	99	0.0349503	0.036885
3908	11329	60	105	0.0363785	0.0384681	81	101	1.03899e-08	1.24234e-08	106	184	0.0231224	0.0240998	62	99	0.00771618	0.00830041
3931	623	63	105	0.00825293	0.00889484	63	101	0.0252211	0.0266484	114	184	0.00072815	0.000779611	60	99	0.0219376	0.0232981
3977	11240	68	105	0.000320624	0.000357209	68	101	0.00161049	0.00175337	107	184	0.0161212	0.0168581	63	99	0.00431679	0.00467401
3977	55722	61	105	0.023022	0.0244983	69	101	0.000829513	0.000908777	113	184	0.00120708	0.00128795	59	99	0.0349503	0.036885
3977	80740	61	105	0.023022	0.0244983	80	101	3.44038e-08	4.07902e-08	115	184	0.00042987	0.000461845	63	99	0.00431679	0.00467401
4005	6790	61	105	0.023022	0.0244983	76	101	2.52582e-06	2.90225e-06	108	184	0.0110176	0.0115594	60	99	0.0219376	0.0232981
4014	56269	67	105	0.000665913	0.000736853	65	101	0.00937046	0.0100175	106	184	0.0231224	0.0240998	64	99	0.00232033	0.00252904
4023	5211	60	105	0.0363785	0.0384681	74	101	1.63777e-05	1.85491e-05	104	184	0.0448459	0.0464374	60	99	0.0219376	0.0232981
4023	8818	66	105	0.00132689	0.00145842	66	101	0.00540895	0.00581717	104	184	0.0448459	0.0464374	59	99	0.0349503	0.036885
4023	9973	66	105	0.00132689	0.00145842	64	101	0.0156509	0.0166332	105	184	0.0325163	0.0337801	61	99	0.0132626	0.0141749
4023	29127	61	105	0.023022	0.0244983	78	101	3.24486e-07	3.78549e-07	114	184	0.00072815	0.000779611	60	99	0.0219376	0.0232981
4023	29959	60	105	0.0363785	0.0384681	68	101	0.00161049	0.00175337	110	184	0.00484178	0.00511387	60	99	0.0219376	0.0232981
4026	6773	66	105	0.00132689	0.00145842	71	101	0.00019535	0.000216795	104	184	0.0448459	0.0464374	63	99	0.00431679	0.00467401
4036	210	60	105	0.0363785	0.0384681	66	101	0.00540895	0.00581717	112	184	0.00195873	0.00208281	60	99	0.0219376	0.0232981
4036	215	76	105	1.86157e-07	2.20183e-07	65	101	0.00937046	0.0100175	110	184	0.00484178	0.00511387	60	99	0.0219376	0.0232981
4036	323	71	105	2.76654e-05	3.14833e-05	63	101	0.0252211	0.0266484	111	184	0.00311195	0.00329793	60	99	0.0219376	0.0232981
4036	528	62	105	0.0140447	0.0150406	62	101	0.0392425	0.0412253	104	184	0.0448459	0.0464374	67	99	0.000281104	0.000312729
4036	1355	73	105	4.31789e-06	4.9874e-06	62	101	0.0392425	0.0412253	105	184	0.0325163	0.0337801	68	99	0.000127673	0.000143044
4036	2146	69	105	0.00014798	0.000166015	62	101	0.0392425	0.0412253	116	184	0.000248309	0.000267709	61	99	0.0132626	0.0141749
4036	2582	76	105	1.86157e-07	2.20183e-07	63	101	0.0252211	0.0266484	118	184	7.75427e-05	8.4191e-05	60	99	0.0219376	0.0232981
4036	2886	68	105	0.000320624	0.000357209	69	101	0.000829513	0.000908777	118	184	7.75427e-05	8.4191e-05	60	99	0.0219376	0.0232981
4036	4194	70	105	6.54112e-05	7.39024e-05	66	101	0.00540895	0.00581717	113	184	0.00120708	0.00128795	63	99	0.00431679	0.00467401
4036	4595	63	105	0.00825293	0.00889484	70	101	0.000410726	0.000452856	113	184	0.00120708	0.00128795	60	99	0.0219376	0.0232981
4036	4940	80	105	1.36332e-09	1.67029e-09	65	101	0.00937046	0.0100175	105	184	0.0325163	0.0337801	68	99	0.000127673	0.000143044
4036	5303	60	105	0.0363785	0.0384681	64	101	0.0156509	0.0166332	105	184	0.0325163	0.0337801	65	99	0.00119731	0.00131381
4036	5591	61	105	0.023022	0.0244983	62	101	0.0392425	0.0412253	107	184	0.0161212	0.0168581	66	99	0.000592616	0.000654728
4036	6610	70	105	6.54112e-05	7.39024e-05	62	101	0.0392425	0.0412253	110	184	0.00484178	0.00511387	61	99	0.0132626	0.0141749
4036	6901	62	105	0.0140447	0.0150406	66	101	0.00540895	0.00581717	114	184	0.00072815	0.000779611	63	99	0.00431679	0.00467401
4036	7249	70	105	6.54112e-05	7.39024e-05	68	101	0.00161049	0.00175337	113	184	0.00120708	0.00128795	59	99	0.0349503	0.036885
4036	7407	72	105	1.11848e-05	1.28222e-05	64	101	0.0156509	0.0166332	109	184	0.00737886	0.00776747	65	99	0.00119731	0.00131381
4036	7536	74	105	1.58994e-06	1.85065e-06	68	101	0.00161049	0.00175337	118	184	7.75427e-05	8.4191e-05	59	99	0.0349503	0.036885
4036	7564	68	105	0.000320624	0.000357209	62	101	0.0392425	0.0412253	110	184	0.00484178	0.00511387	64	99	0.00232033	0.00252904
4036	8086	64	105	0.00466752	0.00506319	74	101	1.63777e-05	1.85491e-05	115	184	0.00042987	0.000461845	60	99	0.0219376	0.0232981
4036	8642	69	105	0.00014798	0.000166015	68	101	0.00161049	0.00175337	110	184	0.00484178	0.00511387	64	99	0.00232033	0.00252904
4036	8659	70	105	6.54112e-05	7.39024e-05	64	101	0.0156509	0.0166332	112	184	0.00195873	0.00208281	60	99	0.0219376	0.0232981
4036	8880	61	105	0.023022	0.0244983	64	101	0.0156509	0.0166332	115	184	0.00042987	0.000461845	62	99	0.00771618	0.00830041
4036	9179	66	105	0.00132689	0.00145842	68	101	0.00161049	0.00175337	118	184	7.75427e-05	8.4191e-05	60	99	0.0219376	0.0232981
4036	9700	75	105	5.57748e-07	6.54351e-07	64	101	0.0156509	0.0166332	105	184	0.0325163	0.0337801	70	99	2.30312e-05	2.61823e-05
4036	9853	64	105	0.00466752	0.00506319	66	101	0.00540895	0.00581717	112	184	0.00195873	0.00208281	59	99	0.0349503	0.036885
4036	10051	61	105	0.023022	0.0244983	65	101	0.00937046	0.0100175	104	184	0.0448459	0.0464374	69	99	5.54702e-05	6.25983e-05
4036	10152	70	105	6.54112e-05	7.39024e-05	62	101	0.0392425	0.0412253	113	184	0.00120708	0.00128795	60	99	0.0219376	0.0232981
4036	10174	64	105	0.00466752	0.00506319	76	101	2.52582e-06	2.90225e-06	113	184	0.00120708	0.00128795	61	99	0.0132626	0.0141749
4036	10298	71	105	2.76654e-05	3.14833e-05	66	101	0.00540895	0.00581717	110	184	0.00484178	0.00511387	63	99	0.00431679	0.00467401
4036	10613	62	105	0.0140447	0.0150406	67	101	0.00300804	0.00325475	115	184	0.00042987	0.000461845	59	99	0.0349503	0.036885
4036	10948	69	105	0.00014798	0.000166015	66	101	0.00540895	0.00581717	106	184	0.0231224	0.0240998	64	99	0.00232033	0.00252904
4036	11083	68	105	0.000320624	0.000357209	64	101	0.0156509	0.0166332	111	184	0.00311195	0.00329793	68	99	0.000127673	0.000143044
4036	11156	70	105	6.54112e-05	7.39024e-05	67	101	0.00300804	0.00325475	113	184	0.00120708	0.00128795	60	99	0.0219376	0.0232981
4036	22839	65	105	0.00253869	0.00277197	72	101	8.91786e-05	9.96279e-05	113	184	0.00120708	0.00128795	60	99	0.0219376	0.0232981
4036	23032	65	105	0.00253869	0.00277197	63	101	0.0252211	0.0266484	105	184	0.0325163	0.0337801	66	99	0.000592616	0.000654728
4036	23112	61	105	0.023022	0.0244983	64	101	0.0156509	0.0166332	105	184	0.0325163	0.0337801	63	99	0.00431679	0.00467401
4036	23155	68	105	0.000320624	0.000357209	62	101	0.0392425	0.0412253	109	184	0.00737886	0.00776747	61	99	0.0132626	0.0141749
4036	23300	68	105	0.000320624	0.000357209	64	101	0.0156509	0.0166332	107	184	0.0161212	0.0168581	61	99	0.0132626	0.0141749
4036	23428	65	105	0.00253869	0.00277197	63	101	0.0252211	0.0266484	107	184	0.0161212	0.0168581	65	99	0.00119731	0.00131381
4036	23522	69	105	0.00014798	0.000166015	67	101	0.00300804	0.00325475	117	184	0.000140311	0.000151805	61	99	0.0132626	0.0141749
4036	25865	61	105	0.023022	0.0244983	71	101	0.00019535	0.000216795	113	184	0.00120708	0.00128795	62	99	0.00771618	0.00830041
4036	25988	74	105	1.58994e-06	1.85065e-06	64	101	0.0156509	0.0166332	110	184	0.00484178	0.00511387	63	99	0.00431679	0.00467401
4036	26100	67	105	0.000665913	0.000736853	66	101	0.00540895	0.00581717	111	184	0.00311195	0.00329793	60	99	0.0219376	0.0232981
4036	26504	61	105	0.023022	0.0244983	72	101	8.91786e-05	9.96279e-05	107	184	0.0161212	0.0168581	65	99	0.00119731	0.00131381
4036	27141	69	105	0.00014798	0.000166015	66	101	0.00540895	0.00581717	104	184	0.0448459	0.0464374	60	99	0.0219376	0.0232981
4036	27237	65	105	0.00253869	0.00277197	70	101	0.000410726	0.000452856	108	184	0.0110176	0.0115594	68	99	0.000127673	0.000143044
4036	27352	63	105	0.00825293	0.00889484	69	101	0.000829513	0.000908777	107	184	0.0161212	0.0168581	60	99	0.0219376	0.0232981
4036	29888	69	105	0.00014798	0.000166015	71	101	0.00019535	0.000216795	113	184	0.00120708	0.00128795	61	99	0.0132626	0.0141749
4036	51087	73	105	4.31789e-06	4.9874e-06	65	101	0.00937046	0.0100175	108	184	0.0110176	0.0115594	69	99	5.54702e-05	6.25983e-05
4036	51272	67	105	0.000665913	0.000736853	63	101	0.0252211	0.0266484	117	184	0.000140311	0.000151805	60	99	0.0219376	0.0232981
4036	51295	64	105	0.00466752	0.00506319	63	101	0.0252211	0.0266484	107	184	0.0161212	0.0168581	64	99	0.00232033	0.00252904
4036	51514	72	105	1.11848e-05	1.28222e-05	64	101	0.0156509	0.0166332	123	184	2.84251e-06	3.14271e-06	61	99	0.0132626	0.0141749
4036	54545	62	105	0.0140447	0.0150406	72	101	8.91786e-05	9.96279e-05	106	184	0.0231224	0.0240998	63	99	0.00431679	0.00467401
4036	54788	67	105	0.000665913	0.000736853	67	101	0.00300804	0.00325475	107	184	0.0161212	0.0168581	64	99	0.00232033	0.00252904
4036	54956	65	105	0.00253869	0.00277197	72	101	8.91786e-05	9.96279e-05	105	184	0.0325163	0.0337801	65	99	0.00119731	0.00131381
4036	55143	75	105	5.57748e-07	6.54351e-07	63	101	0.0252211	0.0266484	106	184	0.0231224	0.0240998	70	99	2.30312e-05	2.61823e-05
4036	55229	60	105	0.0363785	0.0384681	66	101	0.00540895	0.00581717	108	184	0.0110176	0.0115594	63	99	0.00431679	0.00467401
4036	55615	72	105	1.11848e-05	1.28222e-05	63	101	0.0252211	0.0266484	110	184	0.00484178	0.00511387	60	99	0.0219376	0.0232981
4036	55620	61	105	0.023022	0.0244983	71	101	0.00019535	0.000216795	108	184	0.0110176	0.0115594	65	99	0.00119731	0.00131381
4036	55671	66	105	0.00132689	0.00145842	67	101	0.00300804	0.00325475	111	184	0.00311195	0.00329793	62	99	0.00771618	0.00830041
4036	55679	64	105	0.00466752	0.00506319	69	101	0.000829513	0.000908777	106	184	0.0231224	0.0240998	61	99	0.0132626	0.0141749
4036	55723	75	105	5.57748e-07	6.54351e-07	62	101	0.0392425	0.0412253	105	184	0.0325163	0.0337801	63	99	0.00431679	0.00467401
4036	57099	68	105	0.000320624	0.000357209	62	101	0.0392425	0.0412253	105	184	0.0325163	0.0337801	65	99	0.00119731	0.00131381
4036	57228	61	105	0.023022	0.0244983	63	101	0.0252211	0.0266484	118	184	7.75427e-05	8.4191e-05	63	99	0.00431679	0.00467401
4036	64319	72	105	1.11848e-05	1.28222e-05	69	101	0.000829513	0.000908777	106	184	0.0231224	0.0240998	63	99	0.00431679	0.00467401
4036	65095	64	105	0.00466752	0.00506319	65	101	0.00937046	0.0100175	107	184	0.0161212	0.0168581	63	99	0.00431679	0.00467401
4036	79056	67	105	0.000665913	0.000736853	70	101	0.000410726	0.000452856	112	184	0.00195873	0.00208281	60	99	0.0219376	0.0232981
4036	79701	64	105	0.00466752	0.00506319	63	101	0.0252211	0.0266484	105	184	0.0325163	0.0337801	65	99	0.00119731	0.00131381
4036	79703	70	105	6.54112e-05	7.39024e-05	65	101	0.00937046	0.0100175	112	184	0.00195873	0.00208281	65	99	0.00119731	0.00131381
4036	80271	71	105	2.76654e-05	3.14833e-05	63	101	0.0252211	0.0266484	115	184	0.00042987	0.000461845	66	99	0.000592616	0.000654728
4036	83461	73	105	4.31789e-06	4.9874e-06	63	101	0.0252211	0.0266484	106	184	0.0231224	0.0240998	66	99	0.000592616	0.000654728
4036	84619	62	105	0.0140447	0.0150406	75	101	6.57684e-06	7.50204e-06	112	184	0.00195873	0.00208281	62	99	0.00771618	0.00830041
4036	89927	69	105	0.00014798	0.000166015	62	101	0.0392425	0.0412253	106	184	0.0231224	0.0240998	59	99	0.0349503	0.036885
4036	115201	60	105	0.0363785	0.0384681	65	101	0.00937046	0.0100175	117	184	0.000140311	0.000151805	60	99	0.0219376	0.0232981
4036	126321	68	105	0.000320624	0.000357209	67	101	0.00300804	0.00325475	118	184	7.75427e-05	8.4191e-05	59	99	0.0349503	0.036885
4036	140459	73	105	4.31789e-06	4.9874e-06	64	101	0.0156509	0.0166332	113	184	0.00120708	0.00128795	60	99	0.0219376	0.0232981
4036	171017	79	105	5.06067e-09	6.14292e-09	62	101	0.0392425	0.0412253	115	184	0.00042987	0.000461845	59	99	0.0349503	0.036885
4036	283232	67	105	0.000665913	0.000736853	63	101	0.0252211	0.0266484	111	184	0.00311195	0.00329793	62	99	0.00771618	0.00830041
4036	283871	72	105	1.11848e-05	1.28222e-05	63	101	0.0252211	0.0266484	115	184	0.00042987	0.000461845	62	99	0.00771618	0.00830041
4038	55220	64	105	0.00466752	0.00506319	63	101	0.0252211	0.0266484	107	184	0.0161212	0.0168581	65	99	0.00119731	0.00131381
4038	79152	60	105	0.0363785	0.0384681	69	101	0.000829513	0.000908777	114	184	0.00072815	0.000779611	65	99	0.00119731	0.00131381
4122	79703	61	105	0.023022	0.0244983	67	101	0.00300804	0.00325475	107	184	0.0161212	0.0168581	65	99	0.00119731	0.00131381
4128	899	64	105	0.00466752	0.00506319	77	101	9.26738e-07	1.07285e-06	115	184	0.00042987	0.000461845	64	99	0.00232033	0.00252904
4128	949	74	105	1.58994e-06	1.85065e-06	65	101	0.00937046	0.0100175	104	184	0.0448459	0.0464374	60	99	0.0219376	0.0232981
4128	4173	61	105	0.023022	0.0244983	74	101	1.63777e-05	1.85491e-05	107	184	0.0161212	0.0168581	64	99	0.00232033	0.00252904
4128	4296	61	105	0.023022	0.0244983	77	101	9.26738e-07	1.07285e-06	109	184	0.00737886	0.00776747	61	99	0.0132626	0.0141749
4128	5973	71	105	2.76654e-05	3.14833e-05	62	101	0.0392425	0.0412253	105	184	0.0325163	0.0337801	62	99	0.00771618	0.00830041
4128	8914	69	105	0.00014798	0.000166015	68	101	0.00161049	0.00175337	114	184	0.00072815	0.000779611	63	99	0.00431679	0.00467401
4148	9518	62	105	0.0140447	0.0150406	78	101	3.24486e-07	3.78549e-07	105	184	0.0325163	0.0337801	59	99	0.0349503	0.036885
4152	9810	62	105	0.0140447	0.0150406	69	101	0.000829513	0.000908777	104	184	0.0448459	0.0464374	60	99	0.0219376	0.0232981
4204	9088	65	105	0.00253869	0.00277197	76	101	2.52582e-06	2.90225e-06	118	184	7.75427e-05	8.4191e-05	65	99	0.00119731	0.00131381
4205	9088	61	105	0.023022	0.0244983	85	101	5.0415e-11	6.25788e-11	115	184	0.00042987	0.000461845	63	99	0.00431679	0.00467401
4238	79019	63	105	0.00825293	0.00889484	71	101	0.00019535	0.000216795	107	184	0.0161212	0.0168581	59	99	0.0349503	0.036885
4239	11070	74	105	1.58994e-06	1.85065e-06	63	101	0.0252211	0.0266484	106	184	0.0231224	0.0240998	63	99	0.00431679	0.00467401
4239	79600	70	105	6.54112e-05	7.39024e-05	65	101	0.00937046	0.0100175	108	184	0.0110176	0.0115594	59	99	0.0349503	0.036885
4249	2624	60	105	0.0363785	0.0384681	70	101	0.000410726	0.000452856	104	184	0.0448459	0.0464374	63	99	0.00431679	0.00467401
4253	4656	69	105	0.00014798	0.000166015	66	101	0.00540895	0.00581717	112	184	0.00195873	0.00208281	63	99	0.00431679	0.00467401
4287	23457	60	105	0.0363785	0.0384681	81	101	1.03899e-08	1.24234e-08	115	184	0.00042987	0.000461845	63	99	0.00431679	0.00467401
4311	3762	73	105	4.31789e-06	4.9874e-06	64	101	0.0156509	0.0166332	106	184	0.0231224	0.0240998	64	99	0.00232033	0.00252904
4311	23331	61	105	0.023022	0.0244983	69	101	0.000829513	0.000908777	106	184	0.0231224	0.0240998	60	99	0.0219376	0.0232981
4330	10024	68	105	0.000320624	0.000357209	69	101	0.000829513	0.000908777	113	184	0.00120708	0.00128795	60	99	0.0219376	0.0232981
4485	26505	66	105	0.00132689	0.00145842	63	101	0.0252211	0.0266484	105	184	0.0325163	0.0337801	66	99	0.000592616	0.000654728
4548	10535	71	105	2.76654e-05	3.14833e-05	62	101	0.0392425	0.0412253	112	184	0.00195873	0.00208281	59	99	0.0349503	0.036885
4548	11065	60	105	0.0363785	0.0384681	84	101	2.07852e-10	2.55444e-10	122	184	5.7669e-06	6.35241e-06	59	99	0.0349503	0.036885
4604	105	67	105	0.000665913	0.000736853	68	101	0.00161049	0.00175337	113	184	0.00120708	0.00128795	66	99	0.000592616	0.000654728
4604	1723	60	105	0.0363785	0.0384681	66	101	0.00540895	0.00581717	109	184	0.00737886	0.00776747	68	99	0.000127673	0.000143044
4604	2103	68	105	0.000320624	0.000357209	62	101	0.0392425	0.0412253	116	184	0.000248309	0.000267709	61	99	0.0132626	0.0141749
4604	3697	60	105	0.0363785	0.0384681	64	101	0.0156509	0.0166332	106	184	0.0231224	0.0240998	65	99	0.00119731	0.00131381
4604	3805	64	105	0.00466752	0.00506319	67	101	0.00300804	0.00325475	107	184	0.0161212	0.0168581	63	99	0.00431679	0.00467401
4604	3975	71	105	2.76654e-05	3.14833e-05	70	101	0.000410726	0.000452856	105	184	0.0325163	0.0337801	63	99	0.00431679	0.00467401
4604	4656	62	105	0.0140447	0.0150406	85	101	5.0415e-11	6.25788e-11	107	184	0.0161212	0.0168581	68	99	0.000127673	0.000143044
4604	7827	65	105	0.00253869	0.00277197	79	101	1.08293e-07	1.27345e-07	119	184	4.19033e-05	4.56583e-05	60	99	0.0219376	0.0232981
4604	7850	64	105	0.00466752	0.00506319	62	101	0.0392425	0.0412253	107	184	0.0161212	0.0168581	65	99	0.00119731	0.00131381
4604	8526	70	105	6.54112e-05	7.39024e-05	62	101	0.0392425	0.0412253	106	184	0.0231224	0.0240998	61	99	0.0132626	0.0141749
4604	9437	66	105	0.00132689	0.00145842	62	101	0.0392425	0.0412253	113	184	0.00120708	0.00128795	63	99	0.00431679	0.00467401
4604	23114	66	105	0.00132689	0.00145842	68	101	0.00161049	0.00175337	108	184	0.0110176	0.0115594	62	99	0.00771618	0.00830041
4604	55247	64	105	0.00466752	0.00506319	68	101	0.00161049	0.00175337	107	184	0.0161212	0.0168581	67	99	0.000281104	0.000312729
4604	55635	61	105	0.023022	0.0244983	64	101	0.0156509	0.0166332	117	184	0.000140311	0.000151805	62	99	0.00771618	0.00830041
4604	57191	78	105	1.77603e-08	2.13665e-08	64	101	0.0156509	0.0166332	117	184	0.000140311	0.000151805	61	99	0.0132626	0.0141749
4604	158471	60	105	0.0363785	0.0384681	66	101	0.00540895	0.00581717	108	184	0.0110176	0.0115594	60	99	0.0219376	0.0232981
4638	11004	67	105	0.000665913	0.000736853	71	101	0.00019535	0.000216795	106	184	0.0231224	0.0240998	60	99	0.0219376	0.0232981
4643	208	63	105	0.00825293	0.00889484	62	101	0.0392425	0.0412253	109	184	0.00737886	0.00776747	64	99	0.00232033	0.00252904
4643	5536	63	105	0.00825293	0.00889484	87	101	2.47313e-12	3.13477e-12	117	184	0.000140311	0.000151805	60	99	0.0219376	0.0232981
4649	8500	67	105	0.000665913	0.000736853	62	101	0.0392425	0.0412253	104	184	0.0448459	0.0464374	60	99	0.0219376	0.0232981
4649	29926	66	105	0.00132689	0.00145842	62	101	0.0392425	0.0412253	118	184	7.75427e-05	8.4191e-05	60	99	0.0219376	0.0232981
4664	22924	73	105	4.31789e-06	4.9874e-06	73	101	3.90421e-05	4.39132e-05	106	184	0.0231224	0.0240998	59	99	0.0349503	0.036885
4678	9401	67	105	0.000665913	0.000736853	71	101	0.00019535	0.000216795	110	184	0.00484178	0.00511387	60	99	0.0219376	0.0232981
4729	1537	74	105	1.58994e-06	1.85065e-06	67	101	0.00300804	0.00325475	107	184	0.0161212	0.0168581	61	99	0.0132626	0.0141749
4747	8618	62	105	0.0140447	0.0150406	91	101	2.66454e-15	3.54344e-15	106	184	0.0231224	0.0240998	59	99	0.0349503	0.036885
4799	10112	63	105	0.00825293	0.00889484	62	101	0.0392425	0.0412253	104	184	0.0448459	0.0464374	67	99	0.000281104	0.000312729
4801	9262	61	105	0.023022	0.0244983	65	101	0.00937046	0.0100175	111	184	0.00311195	0.00329793	60	99	0.0219376	0.0232981
4801	23154	73	105	4.31789e-06	4.9874e-06	65	101	0.00937046	0.0100175	117	184	0.000140311	0.000151805	61	99	0.0132626	0.0141749
4801	54531	71	105	2.76654e-05	3.14833e-05	64	101	0.0156509	0.0166332	105	184	0.0325163	0.0337801	61	99	0.0132626	0.0141749
4801	57706	79	105	5.06067e-09	6.14292e-09	63	101	0.0252211	0.0266484	111	184	0.00311195	0.00329793	62	99	0.00771618	0.00830041
4801	79845	73	105	4.31789e-06	4.9874e-06	71	101	0.00019535	0.000216795	106	184	0.0231224	0.0240998	59	99	0.0349503	0.036885
4836	22974	67	105	0.000665913	0.000736853	71	101	0.00019535	0.000216795	116	184	0.000248309	0.000267709	61	99	0.0132626	0.0141749
4856	23457	63	105	0.00825293	0.00889484	91	101	2.66454e-15	3.54344e-15	106	184	0.0231224	0.0240998	64	99	0.00232033	0.00252904
4885	6857	66	105	0.00132689	0.00145842	66	101	0.00540895	0.00581717	111	184	0.00311195	0.00329793	59	99	0.0349503	0.036885
4900	80740	60	105	0.0363785	0.0384681	73	101	3.90421e-05	4.39132e-05	107	184	0.0161212	0.0168581	59	99	0.0349503	0.036885
4923	2707	68	105	0.000320624	0.000357209	79	101	1.08293e-07	1.27345e-07	104	184	0.0448459	0.0464374	60	99	0.0219376	0.0232981
4923	3846	64	105	0.00466752	0.00506319	74	101	1.63777e-05	1.85491e-05	109	184	0.00737886	0.00776747	62	99	0.00771618	0.00830041
4923	50943	68	105	0.000320624	0.000357209	77	101	9.26738e-07	1.07285e-06	119	184	4.19033e-05	4.56583e-05	59	99	0.0349503	0.036885
4958	10112	67	105	0.000665913	0.000736853	70	101	0.000410726	0.000452856	109	184	0.00737886	0.00776747	60	99	0.0219376	0.0232981
4958	29763	65	105	0.00253869	0.00277197	70	101	0.000410726	0.000452856	105	184	0.0325163	0.0337801	63	99	0.00431679	0.00467401
4982	27334	61	105	0.023022	0.0244983	88	101	4.97602e-13	6.37782e-13	106	184	0.0231224	0.0240998	59	99	0.0349503	0.036885
5019	1889	63	105	0.00825293	0.00889484	68	101	0.00161049	0.00175337	105	184	0.0325163	0.0337801	64	99	0.00232033	0.00252904
5020	25806	61	105	0.023022	0.0244983	77	101	9.26738e-07	1.07285e-06	106	184	0.0231224	0.0240998	61	99	0.0132626	0.0141749
5023	2678	70	105	6.54112e-05	7.39024e-05	67	101	0.00300804	0.00325475	109	184	0.00737886	0.00776747	60	99	0.0219376	0.0232981
5092	9232	64	105	0.00466752	0.00506319	67	101	0.00300804	0.00325475	105	184	0.0325163	0.0337801	61	99	0.0132626	0.0141749
5105	6005	60	105	0.0363785	0.0384681	69	101	0.000829513	0.000908777	106	184	0.0231224	0.0240998	60	99	0.0219376	0.0232981
5108	26284	66	105	0.00132689	0.00145842	72	101	8.91786e-05	9.96279e-05	108	184	0.0110176	0.0115594	59	99	0.0349503	0.036885
5125	10380	63	105	0.00825293	0.00889484	63	101	0.0252211	0.0266484	110	184	0.00484178	0.00511387	61	99	0.0132626	0.0141749
5125	51594	62	105	0.0140447	0.0150406	73	101	3.90421e-05	4.39132e-05	106	184	0.0231224	0.0240998	62	99	0.00771618	0.00830041
5125	64151	70	105	6.54112e-05	7.39024e-05	71	101	0.00019535	0.000216795	112	184	0.00195873	0.00208281	61	99	0.0132626	0.0141749
5153	9230	68	105	0.000320624	0.000357209	65	101	0.00937046	0.0100175	104	184	0.0448459	0.0464374	59	99	0.0349503	0.036885
5154	333	77	105	5.9034e-08	7.04091e-08	72	101	8.91786e-05	9.96279e-05	105	184	0.0325163	0.0337801	59	99	0.0349503	0.036885
5154	5575	62	105	0.0140447	0.0150406	79	101	1.08293e-07	1.27345e-07	113	184	0.00120708	0.00128795	59	99	0.0349503	0.036885
5166	1063	71	105	2.76654e-05	3.14833e-05	64	101	0.0156509	0.0166332	106	184	0.0231224	0.0240998	60	99	0.0219376	0.0232981
5168	8780	66	105	0.00132689	0.00145842	63	101	0.0252211	0.0266484	105	184	0.0325163	0.0337801	59	99	0.0349503	0.036885
5170	699	74	105	1.58994e-06	1.85065e-06	63	101	0.0252211	0.0266484	107	184	0.0161212	0.0168581	66	99	0.000592616	0.000654728
5179	7380	63	105	0.00825293	0.00889484	65	101	0.00937046	0.0100175	107	184	0.0161212	0.0168581	59	99	0.0349503	0.036885
5189	10112	64	105	0.00466752	0.00506319	76	101	2.52582e-06	2.90225e-06	114	184	0.00072815	0.000779611	65	99	0.00119731	0.00131381
5217	5355	61	105	0.023022	0.0244983	64	101	0.0156509	0.0166332	116	184	0.000248309	0.000267709	59	99	0.0349503	0.036885
5225	22953	67	105	0.000665913	0.000736853	69	101	0.000829513	0.000908777	104	184	0.0448459	0.0464374	65	99	0.00119731	0.00131381
5284	29781	73	105	4.31789e-06	4.9874e-06	64	101	0.0156509	0.0166332	105	184	0.0325163	0.0337801	61	99	0.0132626	0.0141749
5290	3762	74	105	1.58994e-06	1.85065e-06	66	101	0.00540895	0.00581717	106	184	0.0231224	0.0240998	61	99	0.0132626	0.0141749
5318	9704	64	105	0.00466752	0.00506319	77	101	9.26738e-07	1.07285e-06	115	184	0.00042987	0.000461845	59	99	0.0349503	0.036885
5318	23080	63	105	0.00825293	0.00889484	82	101	2.97825e-09	3.59257e-09	114	184	0.00072815	0.000779611	67	99	0.000281104	0.000312729
5318	51540	60	105	0.0363785	0.0384681	72	101	8.91786e-05	9.96279e-05	118	184	7.75427e-05	8.4191e-05	62	99	0.00771618	0.00830041
5318	54982	60	105	0.0363785	0.0384681	69	101	0.000829513	0.000908777	121	184	1.143e-05	1.25445e-05	60	99	0.0219376	0.0232981
5318	56992	63	105	0.00825293	0.00889484	67	101	0.00300804	0.00325475	114	184	0.00072815	0.000779611	63	99	0.00431679	0.00467401
5318	63035	66	105	0.00132689	0.00145842	72	101	8.91786e-05	9.96279e-05	104	184	0.0448459	0.0464374	65	99	0.00119731	0.00131381
5321	26251	69	105	0.00014798	0.000166015	77	101	9.26738e-07	1.07285e-06	104	184	0.0448459	0.0464374	60	99	0.0219376	0.0232981
5321	81930	72	105	1.11848e-05	1.28222e-05	63	101	0.0252211	0.0266484	117	184	0.000140311	0.000151805	61	99	0.0132626	0.0141749
5346	9088	80	105	1.36332e-09	1.67029e-09	62	101	0.0392425	0.0412253	105	184	0.0325163	0.0337801	61	99	0.0132626	0.0141749
5346	9513	63	105	0.00825293	0.00889484	62	101	0.0392425	0.0412253	104	184	0.0448459	0.0464374	60	99	0.0219376	0.0232981
5442	9133	69	105	0.00014798	0.000166015	64	101	0.0156509	0.0166332	107	184	0.0161212	0.0168581	59	99	0.0349503	0.036885
5446	8912	60	105	0.0363785	0.0384681	63	101	0.0252211	0.0266484	109	184	0.00737886	0.00776747	64	99	0.00232033	0.00252904
5446	81620	63	105	0.00825293	0.00889484	65	101	0.00937046	0.0100175	107	184	0.0161212	0.0168581	64	99	0.00232033	0.00252904
5465	51702	62	105	0.0140447	0.0150406	74	101	1.63777e-05	1.85491e-05	116	184	0.000248309	0.000267709	60	99	0.0219376	0.0232981
5468	3904	77	105	5.9034e-08	7.04091e-08	64	101	0.0156509	0.0166332	105	184	0.0325163	0.0337801	61	99	0.0132626	0.0141749
5475	995	76	105	1.86157e-07	2.20183e-07	62	101	0.0392425	0.0412253	119	184	4.19033e-05	4.56583e-05	61	99	0.0132626	0.0141749
5502	2902	65	105	0.00253869	0.00277197	65	101	0.00937046	0.0100175	111	184	0.00311195	0.00329793	67	99	0.000281104	0.000312729
5502	2912	69	105	0.00014798	0.000166015	64	101	0.0156509	0.0166332	124	184	1.36842e-06	1.51858e-06	65	99	0.00119731	0.00131381
5502	3904	65	105	0.00253869	0.00277197	75	101	6.57684e-06	7.50204e-06	115	184	0.00042987	0.000461845	71	99	9.1288e-06	1.04559e-05
5502	4324	62	105	0.0140447	0.0150406	64	101	0.0156509	0.0166332	107	184	0.0161212	0.0168581	72	99	3.45035e-06	3.98241e-06
5502	4791	61	105	0.023022	0.0244983	72	101	8.91786e-05	9.96279e-05	114	184	0.00072815	0.000779611	65	99	0.00119731	0.00131381
5502	5008	63	105	0.00825293	0.00889484	63	101	0.0252211	0.0266484	122	184	5.7669e-06	6.35241e-06	60	99	0.0219376	0.0232981
5502	7301	62	105	0.0140447	0.0150406	80	101	3.44038e-08	4.07902e-08	120	184	2.21368e-05	2.42074e-05	66	99	0.000592616	0.000654728
5502	7551	64	105	0.00466752	0.00506319	64	101	0.0156509	0.0166332	113	184	0.00120708	0.00128795	66	99	0.000592616	0.000654728
5502	7633	61	105	0.023022	0.0244983	71	101	0.00019535	0.000216795	116	184	0.000248309	0.000267709	61	99	0.0132626	0.0141749
5502	9063	63	105	0.00825293	0.00889484	62	101	0.0392425	0.0412253	120	184	2.21368e-05	2.42074e-05	66	99	0.000592616	0.000654728
5502	9493	62	105	0.0140447	0.0150406	64	101	0.0156509	0.0166332	127	184	1.32206e-07	1.48395e-07	64	99	0.00232033	0.00252904
5502	9704	65	105	0.00253869	0.00277197	72	101	8.91786e-05	9.96279e-05	104	184	0.0448459	0.0464374	67	99	0.000281104	0.000312729
5502	9928	63	105	0.00825293	0.00889484	68	101	0.00161049	0.00175337	109	184	0.00737886	0.00776747	65	99	0.00119731	0.00131381
5502	10578	61	105	0.023022	0.0244983	64	101	0.0156509	0.0166332	112	184	0.00195873	0.00208281	69	99	5.54702e-05	6.25983e-05
5502	22941	61	105	0.023022	0.0244983	68	101	0.00161049	0.00175337	117	184	0.000140311	0.000151805	59	99	0.0349503	0.036885
5502	26232	62	105	0.0140447	0.0150406	66	101	0.00540895	0.00581717	115	184	0.00042987	0.000461845	63	99	0.00431679	0.00467401
5502	51540	68	105	0.000320624	0.000357209	67	101	0.00300804	0.00325475	108	184	0.0110176	0.0115594	68	99	0.000127673	0.000143044
5502	53405	60	105	0.0363785	0.0384681	68	101	0.00161049	0.00175337	121	184	1.143e-05	1.25445e-05	63	99	0.00431679	0.00467401
5502	54982	61	105	0.023022	0.0244983	71	101	0.00019535	0.000216795	113	184	0.00120708	0.00128795	72	99	3.45035e-06	3.98241e-06
5502	79712	63	105	0.00825293	0.00889484	67	101	0.00300804	0.00325475	125	184	6.43267e-07	7.16541e-07	62	99	0.00771618	0.00830041
5502	79847	61	105	0.023022	0.0244983	74	101	1.63777e-05	1.85491e-05	132	184	1.63756e-09	1.87491e-09	60	99	0.0219376	0.0232981
5502	84733	64	105	0.00466752	0.00506319	67	101	0.00300804	0.00325475	124	184	1.36842e-06	1.51858e-06	67	99	0.000281104	0.000312729
5516	9725	65	105	0.00253869	0.00277197	76	101	2.52582e-06	2.90225e-06	106	184	0.0231224	0.0240998	59	99	0.0349503	0.036885
5523	9088	66	105	0.00132689	0.00145842	75	101	6.57684e-06	7.50204e-06	105	184	0.0325163	0.0337801	67	99	0.000281104	0.000312729
5532	11047	70	105	6.54112e-05	7.39024e-05	72	101	8.91786e-05	9.96279e-05	118	184	7.75427e-05	8.4191e-05	59	99	0.0349503	0.036885
5537	8270	62	105	0.0140447	0.0150406	70	101	0.000410726	0.000452856	105	184	0.0325163	0.0337801	59	99	0.0349503	0.036885
5562	84900	61	105	0.023022	0.0244983	71	101	0.00019535	0.000216795	110	184	0.00484178	0.00511387	60	99	0.0219376	0.0232981
5565	5509	65	105	0.00253869	0.00277197	69	101	0.000829513	0.000908777	111	184	0.00311195	0.00329793	60	99	0.0219376	0.0232981
5565	7355	72	105	1.11848e-05	1.28222e-05	64	101	0.0156509	0.0166332	104	184	0.0448459	0.0464374	62	99	0.00771618	0.00830041
5565	10460	61	105	0.023022	0.0244983	91	101	2.66454e-15	3.54344e-15	112	184	0.00195873	0.00208281	64	99	0.00232033	0.00252904
5565	55157	63	105	0.00825293	0.00889484	64	101	0.0156509	0.0166332	111	184	0.00311195	0.00329793	67	99	0.000281104	0.000312729
5599	23109	73	105	4.31789e-06	4.9874e-06	71	101	0.00019535	0.000216795	111	184	0.00311195	0.00329793	59	99	0.0349503	0.036885
5599	54535	65	105	0.00253869	0.00277197	64	101	0.0156509	0.0166332	119	184	4.19033e-05	4.56583e-05	60	99	0.0219376	0.0232981
5609	332	67	105	0.000665913	0.000736853	63	101	0.0252211	0.0266484	112	184	0.00195873	0.00208281	63	99	0.00431679	0.00467401
5627	6510	63	105	0.00825293	0.00889484	76	101	2.52582e-06	2.90225e-06	106	184	0.0231224	0.0240998	66	99	0.000592616	0.000654728
5627	6905	66	105	0.00132689	0.00145842	72	101	8.91786e-05	9.96279e-05	106	184	0.0231224	0.0240998	65	99	0.00119731	0.00131381
5627	9140	64	105	0.00466752	0.00506319	69	101	0.000829513	0.000908777	116	184	0.000248309	0.000267709	59	99	0.0349503	0.036885
5649	6343	69	105	0.00014798	0.000166015	69	101	0.000829513	0.000908777	107	184	0.0161212	0.0168581	61	99	0.0132626	0.0141749
5649	55220	60	105	0.0363785	0.0384681	81	101	1.03899e-08	1.24234e-08	123	184	2.84251e-06	3.14271e-06	60	99	0.0219376	0.0232981
5718	55661	63	105	0.00825293	0.00889484	65	101	0.00937046	0.0100175	108	184	0.0110176	0.0115594	60	99	0.0219376	0.0232981
5733	54805	63	105	0.00825293	0.00889484	86	101	1.15188e-11	1.44453e-11	112	184	0.00195873	0.00208281	64	99	0.00232033	0.00252904
5733	55220	68	105	0.000320624	0.000357209	78	101	3.24486e-07	3.78549e-07	118	184	7.75427e-05	8.4191e-05	60	99	0.0219376	0.0232981
5768	2064	64	105	0.00466752	0.00506319	68	101	0.00161049	0.00175337	107	184	0.0161212	0.0168581	60	99	0.0219376	0.0232981
5768	8202	67	105	0.000665913	0.000736853	77	101	9.26738e-07	1.07285e-06	111	184	0.00311195	0.00329793	61	99	0.0132626	0.0141749
5768	23659	63	105	0.00825293	0.00889484	74	101	1.63777e-05	1.85491e-05	121	184	1.143e-05	1.25445e-05	59	99	0.0349503	0.036885
5795	55220	62	105	0.0140447	0.0150406	71	101	0.00019535	0.000216795	107	184	0.0161212	0.0168581	61	99	0.0132626	0.0141749
5797	666	60	105	0.0363785	0.0384681	62	101	0.0392425	0.0412253	104	184	0.0448459	0.0464374	61	99	0.0132626	0.0141749
5798	8739	70	105	6.54112e-05	7.39024e-05	67	101	0.00300804	0.00325475	108	184	0.0110176	0.0115594	60	99	0.0219376	0.0232981
5798	56269	70	105	6.54112e-05	7.39024e-05	74	101	1.63777e-05	1.85491e-05	111	184	0.00311195	0.00329793	59	99	0.0349503	0.036885
5805	9232	72	105	1.11848e-05	1.28222e-05	78	101	3.24486e-07	3.78549e-07	109	184	0.00737886	0.00776747	67	99	0.000281104	0.000312729
5813	9700	66	105	0.00132689	0.00145842	84	101	2.07852e-10	2.55444e-10	113	184	0.00120708	0.00128795	64	99	0.00232033	0.00252904
5813	79818	60	105	0.0363785	0.0384681	73	101	3.90421e-05	4.39132e-05	105	184	0.0325163	0.0337801	61	99	0.0132626	0.0141749
5813	83461	67	105	0.000665913	0.000736853	76	101	2.52582e-06	2.90225e-06	121	184	1.143e-05	1.25445e-05	59	99	0.0349503	0.036885
5868	3833	63	105	0.00825293	0.00889484	72	101	8.91786e-05	9.96279e-05	104	184	0.0448459	0.0464374	60	99	0.0219376	0.0232981
5876	9232	68	105	0.000320624	0.000357209	69	101	0.000829513	0.000908777	111	184	0.00311195	0.00329793	66	99	0.000592616	0.000654728
5906	7112	69	105	0.00014798	0.000166015	64	101	0.0156509	0.0166332	122	184	5.7669e-06	6.35241e-06	61	99	0.0132626	0.0141749
5926	24137	77	105	5.9034e-08	7.04091e-08	69	101	0.000829513	0.000908777	106	184	0.0231224	0.0240998	60	99	0.0219376	0.0232981
5930	9088	62	105	0.0140447	0.0150406	82	101	2.97825e-09	3.59257e-09	104	184	0.0448459	0.0464374	75	99	1.38329e-07	1.63559e-07
5932	550	61	105	0.023022	0.0244983	67	101	0.00300804	0.00325475	109	184	0.00737886	0.00776747	62	99	0.00771618	0.00830041
5950	3240	62	105	0.0140447	0.0150406	74	101	1.63777e-05	1.85491e-05	106	184	0.0231224	0.0240998	62	99	0.00771618	0.00830041
5950	6343	74	105	1.58994e-06	1.85065e-06	64	101	0.0156509	0.0166332	105	184	0.0325163	0.0337801	64	99	0.00232033	0.00252904
5950	6899	70	105	6.54112e-05	7.39024e-05	63	101	0.0252211	0.0266484	105	184	0.0325163	0.0337801	60	99	0.0219376	0.0232981
5950	55220	69	105	0.00014798	0.000166015	71	101	0.00019535	0.000216795	109	184	0.00737886	0.00776747	60	99	0.0219376	0.0232981
5950	63827	68	105	0.000320624	0.000357209	67	101	0.00300804	0.00325475	104	184	0.0448459	0.0464374	61	99	0.0132626	0.0141749
5950	79152	64	105	0.00466752	0.00506319	75	101	6.57684e-06	7.50204e-06	108	184	0.0110176	0.0115594	63	99	0.00431679	0.00467401
5994	1032	63	105	0.00825293	0.00889484	79	101	1.08293e-07	1.27345e-07	109	184	0.00737886	0.00776747	61	99	0.0132626	0.0141749
6019	2583	61	105	0.023022	0.0244983	65	101	0.00937046	0.0100175	107	184	0.0161212	0.0168581	59	99	0.0349503	0.036885
6019	3824	66	105	0.00132689	0.00145842	67	101	0.00300804	0.00325475	107	184	0.0161212	0.0168581	60	99	0.0219376	0.0232981
6019	6698	67	105	0.000665913	0.000736853	69	101	0.000829513	0.000908777	119	184	4.19033e-05	4.56583e-05	59	99	0.0349503	0.036885
6019	64849	60	105	0.0363785	0.0384681	71	101	0.00019535	0.000216795	105	184	0.0325163	0.0337801	61	99	0.0132626	0.0141749
6103	9156	68	105	0.000320624	0.000357209	66	101	0.00540895	0.00581717	114	184	0.00072815	0.000779611	60	99	0.0219376	0.0232981
6120	51512	76	105	1.86157e-07	2.20183e-07	75	101	6.57684e-06	7.50204e-06	109	184	0.00737886	0.00776747	59	99	0.0349503	0.036885
6196	51514	63	105	0.00825293	0.00889484	62	101	0.0392425	0.0412253	106	184	0.0231224	0.0240998	65	99	0.00119731	0.00131381
6236	3805	65	105	0.00253869	0.00277197	71	101	0.00019535	0.000216795	106	184	0.0231224	0.0240998	59	99	0.0349503	0.036885
6253	22974	60	105	0.0363785	0.0384681	72	101	8.91786e-05	9.96279e-05	104	184	0.0448459	0.0464374	64	99	0.00232033	0.00252904
6257	10024	61	105	0.023022	0.0244983	65	101	0.00937046	0.0100175	114	184	0.00072815	0.000779611	62	99	0.00771618	0.00830041
6273	2305	61	105	0.023022	0.0244983	68	101	0.00161049	0.00175337	106	184	0.0231224	0.0240998	62	99	0.00771618	0.00830041
6273	51512	64	105	0.00466752	0.00506319	69	101	0.000829513	0.000908777	111	184	0.00311195	0.00329793	64	99	0.00232033	0.00252904
6304	6939	68	105	0.000320624	0.000357209	64	101	0.0156509	0.0166332	112	184	0.00195873	0.00208281	62	99	0.00771618	0.00830041
6332	186	80	105	1.36332e-09	1.67029e-09	63	101	0.0252211	0.0266484	104	184	0.0448459	0.0464374	60	99	0.0219376	0.0232981
6422	8914	66	105	0.00132689	0.00145842	74	101	1.63777e-05	1.85491e-05	105	184	0.0325163	0.0337801	65	99	0.00119731	0.00131381
6422	11020	68	105	0.000320624	0.000357209	74	101	1.63777e-05	1.85491e-05	104	184	0.0448459	0.0464374	62	99	0.00771618	0.00830041
6422	23383	62	105	0.0140447	0.0150406	74	101	1.63777e-05	1.85491e-05	106	184	0.0231224	0.0240998	62	99	0.00771618	0.00830041
6422	51312	65	105	0.00253869	0.00277197	74	101	1.63777e-05	1.85491e-05	112	184	0.00195873	0.00208281	61	99	0.0132626	0.0141749
6422	55558	77	105	5.9034e-08	7.04091e-08	67	101	0.00300804	0.00325475	107	184	0.0161212	0.0168581	61	99	0.0132626	0.0141749
6422	55776	62	105	0.0140447	0.0150406	72	101	8.91786e-05	9.96279e-05	107	184	0.0161212	0.0168581	62	99	0.00771618	0.00830041
6422	57466	68	105	0.000320624	0.000357209	62	101	0.0392425	0.0412253	115	184	0.00042987	0.000461845	59	99	0.0349503	0.036885
6422	81622	63	105	0.00825293	0.00889484	76	101	2.52582e-06	2.90225e-06	108	184	0.0110176	0.0115594	60	99	0.0219376	0.0232981
6422	112611	68	105	0.000320624	0.000357209	64	101	0.0156509	0.0166332	106	184	0.0231224	0.0240998	62	99	0.00771618	0.00830041
6422	114884	63	105	0.00825293	0.00889484	66	101	0.00540895	0.00581717	104	184	0.0448459	0.0464374	61	99	0.0132626	0.0141749
6422	115703	66	105	0.00132689	0.00145842	77	101	9.26738e-07	1.07285e-06	109	184	0.00737886	0.00776747	60	99	0.0219376	0.0232981
6424	712	62	105	0.0140447	0.0150406	77	101	9.26738e-07	1.07285e-06	108	184	0.0110176	0.0115594	63	99	0.00431679	0.00467401
6432	1209	69	105	0.00014798	0.000166015	65	101	0.00937046	0.0100175	107	184	0.0161212	0.0168581	59	99	0.0349503	0.036885
6443	2624	65	105	0.00253869	0.00277197	68	101	0.00161049	0.00175337	114	184	0.00072815	0.000779611	61	99	0.0132626	0.0141749
6443	54455	69	105	0.00014798	0.000166015	62	101	0.0392425	0.0412253	116	184	0.000248309	0.000267709	64	99	0.00232033	0.00252904
6457	64344	71	105	2.76654e-05	3.14833e-05	65	101	0.00937046	0.0100175	107	184	0.0161212	0.0168581	59	99	0.0349503	0.036885
6468	1365	61	105	0.023022	0.0244983	67	101	0.00300804	0.00325475	106	184	0.0231224	0.0240998	60	99	0.0219376	0.0232981
6474	80740	61	105	0.023022	0.0244983	63	101	0.0252211	0.0266484	105	184	0.0325163	0.0337801	59	99	0.0349503	0.036885
6505	79087	60	105	0.0363785	0.0384681	67	101	0.00300804	0.00325475	113	184	0.00120708	0.00128795	63	99	0.00431679	0.00467401
6590	3833	62	105	0.0140447	0.0150406	80	101	3.44038e-08	4.07902e-08	104	184	0.0448459	0.0464374	60	99	0.0219376	0.0232981
6590	55040	70	105	6.54112e-05	7.39024e-05	65	101	0.00937046	0.0100175	104	184	0.0448459	0.0464374	60	99	0.0219376	0.0232981
6594	2054	66	105	0.00132689	0.00145842	66	101	0.00540895	0.00581717	110	184	0.00484178	0.00511387	60	99	0.0219376	0.0232981
6594	6688	77	105	5.9034e-08	7.04091e-08	67	101	0.00300804	0.00325475	105	184	0.0325163	0.0337801	59	99	0.0349503	0.036885
6594	10024	69	105	0.00014798	0.000166015	67	101	0.00300804	0.00325475	116	184	0.000248309	0.000267709	61	99	0.0132626	0.0141749
6594	55157	60	105	0.0363785	0.0384681	62	101	0.0392425	0.0412253	117	184	0.000140311	0.000151805	66	99	0.000592616	0.000654728
6594	79019	64	105	0.00466752	0.00506319	65	101	0.00937046	0.0100175	125	184	6.43267e-07	7.16541e-07	60	99	0.0219376	0.0232981
6594	80178	71	105	2.76654e-05	3.14833e-05	71	101	0.00019535	0.000216795	117	184	0.000140311	0.000151805	59	99	0.0349503	0.036885
6594	80196	66	105	0.00132689	0.00145842	67	101	0.00300804	0.00325475	105	184	0.0325163	0.0337801	63	99	0.00431679	0.00467401
6594	80230	65	105	0.00253869	0.00277197	63	101	0.0252211	0.0266484	106	184	0.0231224	0.0240998	60	99	0.0219376	0.0232981
6594	113251	61	105	0.023022	0.0244983	76	101	2.52582e-06	2.90225e-06	117	184	0.000140311	0.000151805	59	99	0.0349503	0.036885
6595	2125	66	105	0.00132689	0.00145842	79	101	1.08293e-07	1.27345e-07	116	184	0.000248309	0.000267709	59	99	0.0349503	0.036885
6595	5711	70	105	6.54112e-05	7.39024e-05	66	101	0.00540895	0.00581717	111	184	0.00311195	0.00329793	60	99	0.0219376	0.0232981
6617	79019	62	105	0.0140447	0.0150406	80	101	3.44038e-08	4.07902e-08	105	184	0.0325163	0.0337801	68	99	0.000127673	0.000143044
6641	699	77	105	5.9034e-08	7.04091e-08	63	101	0.0252211	0.0266484	108	184	0.0110176	0.0115594	66	99	0.000592616	0.000654728
6642	10051	65	105	0.00253869	0.00277197	63	101	0.0252211	0.0266484	104	184	0.0448459	0.0464374	68	99	0.000127673	0.000143044
6642	10280	64	105	0.00466752	0.00506319	79	101	1.08293e-07	1.27345e-07	112	184	0.00195873	0.00208281	59	99	0.0349503	0.036885
6683	9928	75	105	5.57748e-07	6.54351e-07	69	101	0.000829513	0.000908777	111	184	0.00311195	0.00329793	60	99	0.0219376	0.0232981
6715	79019	61	105	0.023022	0.0244983	62	101	0.0392425	0.0412253	104	184	0.0448459	0.0464374	61	99	0.0132626	0.0141749
6744	10024	60	105	0.0363785	0.0384681	87	101	2.47313e-12	3.13477e-12	108	184	0.0110176	0.0115594	60	99	0.0219376	0.0232981
6774	9232	75	105	5.57748e-07	6.54351e-07	62	101	0.0392425	0.0412253	109	184	0.00737886	0.00776747	70	99	2.30312e-05	2.61823e-05
6877	332	68	105	0.000320624	0.000357209	73	101	3.90421e-05	4.39132e-05	114	184	0.00072815	0.000779611	64	99	0.00232033	0.00252904
6884	2305	68	105	0.000320624	0.000357209	88	101	4.97602e-13	6.37782e-13	107	184	0.0161212	0.0168581	69	99	5.54702e-05	6.25983e-05
6919	10024	69	105	0.00014798	0.000166015	63	101	0.0252211	0.0266484	115	184	0.00042987	0.000461845	66	99	0.000592616	0.000654728
6926	79818	64	105	0.00466752	0.00506319	72	101	8.91786e-05	9.96279e-05	104	184	0.0448459	0.0464374	63	99	0.00431679	0.00467401
6942	79019	60	105	0.0363785	0.0384681	62	101	0.0392425	0.0412253	110	184	0.00484178	0.00511387	63	99	0.00431679	0.00467401
7018	9518	68	105	0.000320624	0.000357209	73	101	3.90421e-05	4.39132e-05	108	184	0.0110176	0.0115594	64	99	0.00232033	0.00252904
7049	991	74	105	1.58994e-06	1.85065e-06	63	101	0.0252211	0.0266484	109	184	0.00737886	0.00776747	62	99	0.00771618	0.00830041
7049	5298	65	105	0.00253869	0.00277197	70	101	0.000410726	0.000452856	104	184	0.0448459	0.0464374	61	99	0.0132626	0.0141749
7049	5824	63	105	0.00825293	0.00889484	70	101	0.000410726	0.000452856	110	184	0.00484178	0.00511387	59	99	0.0349503	0.036885
7049	8309	74	105	1.58994e-06	1.85065e-06	62	101	0.0392425	0.0412253	110	184	0.00484178	0.00511387	60	99	0.0219376	0.0232981
7049	9056	67	105	0.000665913	0.000736853	62	101	0.0392425	0.0412253	111	184	0.00311195	0.00329793	60	99	0.0219376	0.0232981
7049	9232	67	105	0.000665913	0.000736853	74	101	1.63777e-05	1.85491e-05	108	184	0.0110176	0.0115594	64	99	0.00232033	0.00252904
7049	26574	60	105	0.0363785	0.0384681	74	101	1.63777e-05	1.85491e-05	106	184	0.0231224	0.0240998	61	99	0.0132626	0.0141749
7049	56987	61	105	0.023022	0.0244983	66	101	0.00540895	0.00581717	105	184	0.0325163	0.0337801	62	99	0.00771618	0.00830041
7049	79415	67	105	0.000665913	0.000736853	68	101	0.00161049	0.00175337	108	184	0.0110176	0.0115594	59	99	0.0349503	0.036885
7060	9232	62	105	0.0140447	0.0150406	62	101	0.0392425	0.0412253	109	184	0.00737886	0.00776747	60	99	0.0219376	0.0232981
7105	10565	69	105	0.00014798	0.000166015	67	101	0.00300804	0.00325475	104	184	0.0448459	0.0464374	61	99	0.0132626	0.0141749
7124	2036	61	105	0.023022	0.0244983	70	101	0.000410726	0.000452856	129	184	2.46242e-08	2.78561e-08	60	99	0.0219376	0.0232981
7140	4656	66	105	0.00132689	0.00145842	77	101	9.26738e-07	1.07285e-06	105	184	0.0325163	0.0337801	62	99	0.00771618	0.00830041
7140	79152	62	105	0.0140447	0.0150406	75	101	6.57684e-06	7.50204e-06	107	184	0.0161212	0.0168581	62	99	0.00771618	0.00830041
7155	1509	63	105	0.00825293	0.00889484	62	101	0.0392425	0.0412253	109	184	0.00737886	0.00776747	65	99	0.00119731	0.00131381
7168	9232	71	105	2.76654e-05	3.14833e-05	67	101	0.00300804	0.00325475	112	184	0.00195873	0.00208281	60	99	0.0219376	0.0232981
7174	24137	61	105	0.023022	0.0244983	71	101	0.00019535	0.000216795	107	184	0.0161212	0.0168581	69	99	5.54702e-05	6.25983e-05
7174	51512	68	105	0.000320624	0.000357209	84	101	2.07852e-10	2.55444e-10	112	184	0.00195873	0.00208281	63	99	0.00431679	0.00467401
7175	9918	63	105	0.00825293	0.00889484	72	101	8.91786e-05	9.96279e-05	109	184	0.00737886	0.00776747	61	99	0.0132626	0.0141749
7188	51512	62	105	0.0140447	0.0150406	65	101	0.00937046	0.0100175	105	184	0.0325163	0.0337801	65	99	0.00119731	0.00131381
7189	9088	61	105	0.023022	0.0244983	89	101	9.35918e-14	1.21361e-13	113	184	0.00120708	0.00128795	65	99	0.00119731	0.00131381
7220	7262	62	105	0.0140447	0.0150406	73	101	3.90421e-05	4.39132e-05	111	184	0.00311195	0.00329793	63	99	0.00431679	0.00467401
7220	54982	60	105	0.0363785	0.0384681	77	101	9.26738e-07	1.07285e-06	111	184	0.00311195	0.00329793	62	99	0.00771618	0.00830041
7220	55388	67	105	0.000665913	0.000736853	66	101	0.00540895	0.00581717	118	184	7.75427e-05	8.4191e-05	64	99	0.00232033	0.00252904
7360	1457	74	105	1.58994e-06	1.85065e-06	62	101	0.0392425	0.0412253	106	184	0.0231224	0.0240998	69	99	5.54702e-05	6.25983e-05
7373	23457	70	105	6.54112e-05	7.39024e-05	80	101	3.44038e-08	4.07902e-08	105	184	0.0325163	0.0337801	64	99	0.00232033	0.00252904
7403	8318	70	105	6.54112e-05	7.39024e-05	69	101	0.000829513	0.000908777	110	184	0.00484178	0.00511387	62	99	0.00771618	0.00830041
7403	56905	64	105	0.00466752	0.00506319	72	101	8.91786e-05	9.96279e-05	107	184	0.0161212	0.0168581	61	99	0.0132626	0.0141749
7424	6016	66	105	0.00132689	0.00145842	64	101	0.0156509	0.0166332	112	184	0.00195873	0.00208281	60	99	0.0219376	0.0232981
7434	80740	61	105	0.023022	0.0244983	63	101	0.0252211	0.0266484	110	184	0.00484178	0.00511387	60	99	0.0219376	0.0232981
7436	8438	73	105	4.31789e-06	4.9874e-06	74	101	1.63777e-05	1.85491e-05	106	184	0.0231224	0.0240998	61	99	0.0132626	0.0141749
7436	29781	69	105	0.00014798	0.000166015	68	101	0.00161049	0.00175337	110	184	0.00484178	0.00511387	60	99	0.0219376	0.0232981
7486	9986	65	105	0.00253869	0.00277197	72	101	8.91786e-05	9.96279e-05	116	184	0.000248309	0.000267709	61	99	0.0132626	0.0141749
7486	10112	68	105	0.000320624	0.000357209	71	101	0.00019535	0.000216795	112	184	0.00195873	0.00208281	68	99	0.000127673	0.000143044
7543	80178	74	105	1.58994e-06	1.85065e-06	74	101	1.63777e-05	1.85491e-05	115	184	0.00042987	0.000461845	61	99	0.0132626	0.0141749
7570	9232	60	105	0.0363785	0.0384681	93	101	0	0	121	184	1.143e-05	1.25445e-05	59	99	0.0349503	0.036885
7570	26133	72	105	1.11848e-05	1.28222e-05	74	101	1.63777e-05	1.85491e-05	104	184	0.0448459	0.0464374	59	99	0.0349503	0.036885
7570	27161	69	105	0.00014798	0.000166015	81	101	1.03899e-08	1.24234e-08	106	184	0.0231224	0.0240998	60	99	0.0219376	0.0232981
7625	51512	62	105	0.0140447	0.0150406	77	101	9.26738e-07	1.07285e-06	111	184	0.00311195	0.00329793	61	99	0.0132626	0.0141749
7704	9156	70	105	6.54112e-05	7.39024e-05	65	101	0.00937046	0.0100175	120	184	2.21368e-05	2.42074e-05	59	99	0.0349503	0.036885
7704	10847	63	105	0.00825293	0.00889484	64	101	0.0156509	0.0166332	104	184	0.0448459	0.0464374	61	99	0.0132626	0.0141749
7704	29781	61	105	0.023022	0.0244983	68	101	0.00161049	0.00175337	113	184	0.00120708	0.00128795	61	99	0.0132626	0.0141749
7704	57332	69	105	0.00014798	0.000166015	71	101	0.00019535	0.000216795	111	184	0.00311195	0.00329793	60	99	0.0219376	0.0232981
7705	11065	71	105	2.76654e-05	3.14833e-05	66	101	0.00540895	0.00581717	109	184	0.00737886	0.00776747	63	99	0.00431679	0.00467401
7741	51514	67	105	0.000665913	0.000736853	67	101	0.00300804	0.00325475	111	184	0.00311195	0.00329793	59	99	0.0349503	0.036885
7750	11004	60	105	0.0363785	0.0384681	70	101	0.000410726	0.000452856	107	184	0.0161212	0.0168581	61	99	0.0132626	0.0141749
7771	332	65	105	0.00253869	0.00277197	66	101	0.00540895	0.00581717	108	184	0.0110176	0.0115594	66	99	0.000592616	0.000654728
7771	1062	63	105	0.00825293	0.00889484	62	101	0.0392425	0.0412253	112	184	0.00195873	0.00208281	64	99	0.00232033	0.00252904
7771	3014	64	105	0.00466752	0.00506319	68	101	0.00161049	0.00175337	123	184	2.84251e-06	3.14271e-06	62	99	0.00771618	0.00830041
7771	24137	64	105	0.00466752	0.00506319	78	101	3.24486e-07	3.78549e-07	121	184	1.143e-05	1.25445e-05	63	99	0.00431679	0.00467401
7771	54478	67	105	0.000665913	0.000736853	63	101	0.0252211	0.0266484	126	184	2.95193e-07	3.30073e-07	63	99	0.00431679	0.00467401
7775	22974	67	105	0.000665913	0.000736853	71	101	0.00019535	0.000216795	105	184	0.0325163	0.0337801	64	99	0.00232033	0.00252904
7776	1130	68	105	0.000320624	0.000357209	64	101	0.0156509	0.0166332	111	184	0.00311195	0.00329793	59	99	0.0349503	0.036885
7776	8438	75	105	5.57748e-07	6.54351e-07	74	101	1.63777e-05	1.85491e-05	110	184	0.00484178	0.00511387	61	99	0.0132626	0.0141749
7776	29781	68	105	0.000320624	0.000357209	71	101	0.00019535	0.000216795	109	184	0.00737886	0.00776747	63	99	0.00431679	0.00467401
7776	54676	66	105	0.00132689	0.00145842	72	101	8.91786e-05	9.96279e-05	105	184	0.0325163	0.0337801	59	99	0.0349503	0.036885
7776	55203	61	105	0.023022	0.0244983	80	101	3.44038e-08	4.07902e-08	112	184	0.00195873	0.00208281	66	99	0.000592616	0.000654728
7776	79153	61	105	0.023022	0.0244983	76	101	2.52582e-06	2.90225e-06	107	184	0.0161212	0.0168581	59	99	0.0349503	0.036885
7798	2932	60	105	0.0363785	0.0384681	68	101	0.00161049	0.00175337	117	184	0.000140311	0.000151805	64	99	0.00232033	0.00252904
7798	5684	60	105	0.0363785	0.0384681	78	101	3.24486e-07	3.78549e-07	104	184	0.0448459	0.0464374	59	99	0.0349503	0.036885
7881	6698	70	105	6.54112e-05	7.39024e-05	69	101	0.000829513	0.000908777	110	184	0.00484178	0.00511387	65	99	0.00119731	0.00131381
7978	673	62	105	0.0140447	0.0150406	68	101	0.00161049	0.00175337	106	184	0.0231224	0.0240998	60	99	0.0219376	0.0232981
7978	8438	62	105	0.0140447	0.0150406	88	101	4.97602e-13	6.37782e-13	108	184	0.0110176	0.0115594	60	99	0.0219376	0.0232981
7978	8608	66	105	0.00132689	0.00145842	71	101	0.00019535	0.000216795	105	184	0.0325163	0.0337801	62	99	0.00771618	0.00830041
7978	9493	73	105	4.31789e-06	4.9874e-06	65	101	0.00937046	0.0100175	104	184	0.0448459	0.0464374	61	99	0.0132626	0.0141749
7984	10460	67	105	0.000665913	0.000736853	65	101	0.00937046	0.0100175	104	184	0.0448459	0.0464374	59	99	0.0349503	0.036885
8148	9055	66	105	0.00132689	0.00145842	69	101	0.000829513	0.000908777	106	184	0.0231224	0.0240998	61	99	0.0132626	0.0141749
8189	2305	63	105	0.00825293	0.00889484	63	101	0.0252211	0.0266484	113	184	0.00120708	0.00128795	59	99	0.0349503	0.036885
8209	9232	70	105	6.54112e-05	7.39024e-05	72	101	8.91786e-05	9.96279e-05	117	184	0.000140311	0.000151805	61	99	0.0132626	0.0141749
8228	22933	76	105	1.86157e-07	2.20183e-07	65	101	0.00937046	0.0100175	106	184	0.0231224	0.0240998	61	99	0.0132626	0.0141749
8243	57332	64	105	0.00466752	0.00506319	76	101	2.52582e-06	2.90225e-06	111	184	0.00311195	0.00329793	61	99	0.0132626	0.0141749
8321	1058	62	105	0.0140447	0.0150406	72	101	8.91786e-05	9.96279e-05	111	184	0.00311195	0.00329793	64	99	0.00232033	0.00252904
8321	5347	80	105	1.36332e-09	1.67029e-09	78	101	3.24486e-07	3.78549e-07	105	184	0.0325163	0.0337801	61	99	0.0132626	0.0141749
8321	81620	73	105	4.31789e-06	4.9874e-06	74	101	1.63777e-05	1.85491e-05	107	184	0.0161212	0.0168581	63	99	0.00431679	0.00467401
8322	10342	67	105	0.000665913	0.000736853	68	101	0.00161049	0.00175337	105	184	0.0325163	0.0337801	60	99	0.0219376	0.0232981
8382	3695	68	105	0.000320624	0.000357209	69	101	0.000829513	0.000908777	105	184	0.0325163	0.0337801	59	99	0.0349503	0.036885
8382	6688	73	105	4.31789e-06	4.9874e-06	68	101	0.00161049	0.00175337	107	184	0.0161212	0.0168581	59	99	0.0349503	0.036885
8382	7355	69	105	0.00014798	0.000166015	65	101	0.00937046	0.0100175	107	184	0.0161212	0.0168581	60	99	0.0219376	0.0232981
8382	10024	70	105	6.54112e-05	7.39024e-05	63	101	0.0252211	0.0266484	112	184	0.00195873	0.00208281	60	99	0.0219376	0.0232981
8382	10460	67	105	0.000665913	0.000736853	81	101	1.03899e-08	1.24234e-08	108	184	0.0110176	0.0115594	60	99	0.0219376	0.0232981
8382	22974	60	105	0.0363785	0.0384681	79	101	1.08293e-07	1.27345e-07	115	184	0.00042987	0.000461845	61	99	0.0132626	0.0141749
8382	55157	70	105	6.54112e-05	7.39024e-05	65	101	0.00937046	0.0100175	110	184	0.00484178	0.00511387	63	99	0.00431679	0.00467401
8382	64924	60	105	0.0363785	0.0384681	67	101	0.00300804	0.00325475	109	184	0.00737886	0.00776747	60	99	0.0219376	0.0232981
8382	79088	63	105	0.00825293	0.00889484	76	101	2.52582e-06	2.90225e-06	104	184	0.0448459	0.0464374	63	99	0.00431679	0.00467401
8382	79980	66	105	0.00132689	0.00145842	62	101	0.0392425	0.0412253	105	184	0.0325163	0.0337801	60	99	0.0219376	0.0232981
8395	3805	60	105	0.0363785	0.0384681	73	101	3.90421e-05	4.39132e-05	105	184	0.0325163	0.0337801	62	99	0.00771618	0.00830041
8435	10317	61	105	0.023022	0.0244983	62	101	0.0392425	0.0412253	112	184	0.00195873	0.00208281	59	99	0.0349503	0.036885
8436	699	74	105	1.58994e-06	1.85065e-06	78	101	3.24486e-07	3.78549e-07	105	184	0.0325163	0.0337801	63	99	0.00431679	0.00467401
8436	2306	78	105	1.77603e-08	2.13665e-08	65	101	0.00937046	0.0100175	113	184	0.00120708	0.00128795	62	99	0.00771618	0.00830041
8436	53820	60	105	0.0363785	0.0384681	70	101	0.000410726	0.000452856	105	184	0.0325163	0.0337801	59	99	0.0349503	0.036885
8450	9700	81	105	3.46546e-10	4.28701e-10	63	101	0.0252211	0.0266484	115	184	0.00042987	0.000461845	62	99	0.00771618	0.00830041
8459	9232	81	105	3.46546e-10	4.28701e-10	62	101	0.0392425	0.0412253	115	184	0.00042987	0.000461845	60	99	0.0219376	0.0232981
8470	332	67	105	0.000665913	0.000736853	65	101	0.00937046	0.0100175	125	184	6.43267e-07	7.16541e-07	64	99	0.00232033	0.00252904
8470	5347	73	105	4.31789e-06	4.9874e-06	66	101	0.00540895	0.00581717	108	184	0.0110176	0.0115594	66	99	0.000592616	0.000654728
8470	79037	65	105	0.00253869	0.00277197	64	101	0.0156509	0.0166332	119	184	4.19033e-05	4.56583e-05	59	99	0.0349503	0.036885
8470	81620	71	105	2.76654e-05	3.14833e-05	64	101	0.0156509	0.0166332	107	184	0.0161212	0.0168581	61	99	0.0132626	0.0141749
8473	6522	72	105	1.11848e-05	1.28222e-05	72	101	8.91786e-05	9.96279e-05	111	184	0.00311195	0.00329793	60	99	0.0219376	0.0232981
8477	55765	67	105	0.000665913	0.000736853	65	101	0.00937046	0.0100175	104	184	0.0448459	0.0464374	60	99	0.0219376	0.0232981
8509	80019	61	105	0.023022	0.0244983	63	101	0.0252211	0.0266484	110	184	0.00484178	0.00511387	59	99	0.0349503	0.036885
8515	489	61	105	0.023022	0.0244983	64	101	0.0156509	0.0166332	110	184	0.00484178	0.00511387	59	99	0.0349503	0.036885
8515	55222	68	105	0.000320624	0.000357209	67	101	0.00300804	0.00325475	105	184	0.0325163	0.0337801	62	99	0.00771618	0.00830041
8528	4656	66	105	0.00132689	0.00145842	73	101	3.90421e-05	4.39132e-05	106	184	0.0231224	0.0240998	60	99	0.0219376	0.0232981
8558	10460	74	105	1.58994e-06	1.85065e-06	65	101	0.00937046	0.0100175	111	184	0.00311195	0.00329793	60	99	0.0219376	0.0232981
8601	8739	65	105	0.00253869	0.00277197	72	101	8.91786e-05	9.96279e-05	120	184	2.21368e-05	2.42074e-05	60	99	0.0219376	0.0232981
8604	9725	69	105	0.00014798	0.000166015	73	101	3.90421e-05	4.39132e-05	109	184	0.00737886	0.00776747	59	99	0.0349503	0.036885
8644	1040	64	105	0.00466752	0.00506319	71	101	0.00019535	0.000216795	104	184	0.0448459	0.0464374	61	99	0.0132626	0.0141749
8644	2288	77	105	5.9034e-08	7.04091e-08	64	101	0.0156509	0.0166332	107	184	0.0161212	0.0168581	66	99	0.000592616	0.000654728
8644	6813	65	105	0.00253869	0.00277197	78	101	3.24486e-07	3.78549e-07	110	184	0.00484178	0.00511387	61	99	0.0132626	0.0141749
8644	11033	64	105	0.00466752	0.00506319	75	101	6.57684e-06	7.50204e-06	104	184	0.0448459	0.0464374	60	99	0.0219376	0.0232981
8644	11311	74	105	1.58994e-06	1.85065e-06	63	101	0.0252211	0.0266484	104	184	0.0448459	0.0464374	61	99	0.0132626	0.0141749
8644	27301	70	105	6.54112e-05	7.39024e-05	66	101	0.00540895	0.00581717	111	184	0.00311195	0.00329793	63	99	0.00431679	0.00467401
8644	51067	60	105	0.0363785	0.0384681	73	101	3.90421e-05	4.39132e-05	110	184	0.00484178	0.00511387	59	99	0.0349503	0.036885
8660	54867	69	105	0.00014798	0.000166015	65	101	0.00937046	0.0100175	109	184	0.00737886	0.00776747	59	99	0.0349503	0.036885
8674	83461	69	105	0.00014798	0.000166015	68	101	0.00161049	0.00175337	117	184	0.000140311	0.000151805	61	99	0.0132626	0.0141749
8678	7083	62	105	0.0140447	0.0150406	64	101	0.0156509	0.0166332	109	184	0.00737886	0.00776747	60	99	0.0219376	0.0232981
8706	332	65	105	0.00253869	0.00277197	62	101	0.0392425	0.0412253	110	184	0.00484178	0.00511387	61	99	0.0132626	0.0141749
8731	54552	74	105	1.58994e-06	1.85065e-06	62	101	0.0392425	0.0412253	104	184	0.0448459	0.0464374	61	99	0.0132626	0.0141749
8842	892	60	105	0.0363785	0.0384681	66	101	0.00540895	0.00581717	105	184	0.0325163	0.0337801	59	99	0.0349503	0.036885
8842	1317	61	105	0.023022	0.0244983	62	101	0.0392425	0.0412253	107	184	0.0161212	0.0168581	59	99	0.0349503	0.036885
8842	2064	63	105	0.00825293	0.00889484	74	101	1.63777e-05	1.85491e-05	108	184	0.0110176	0.0115594	59	99	0.0349503	0.036885
8842	3321	64	105	0.00466752	0.00506319	68	101	0.00161049	0.00175337	105	184	0.0325163	0.0337801	62	99	0.00771618	0.00830041
8842	3712	70	105	6.54112e-05	7.39024e-05	75	101	6.57684e-06	7.50204e-06	104	184	0.0448459	0.0464374	60	99	0.0219376	0.0232981
8842	6004	75	105	5.57748e-07	6.54351e-07	64	101	0.0156509	0.0166332	108	184	0.0110176	0.0115594	60	99	0.0219376	0.0232981
8842	6790	76	105	1.86157e-07	2.20183e-07	63	101	0.0252211	0.0266484	112	184	0.00195873	0.00208281	60	99	0.0219376	0.0232981
8842	10058	77	105	5.9034e-08	7.04091e-08	65	101	0.00937046	0.0100175	110	184	0.00484178	0.00511387	60	99	0.0219376	0.0232981
8842	27253	67	105	0.000665913	0.000736853	66	101	0.00540895	0.00581717	108	184	0.0110176	0.0115594	59	99	0.0349503	0.036885
8842	51805	69	105	0.00014798	0.000166015	67	101	0.00300804	0.00325475	106	184	0.0231224	0.0240998	60	99	0.0219376	0.0232981
8875	6698	61	105	0.023022	0.0244983	73	101	3.90421e-05	4.39132e-05	116	184	0.000248309	0.000267709	60	99	0.0219376	0.0232981
8897	10024	61	105	0.023022	0.0244983	71	101	0.00019535	0.000216795	104	184	0.0448459	0.0464374	63	99	0.00431679	0.00467401
8908	1368	62	105	0.0140447	0.0150406	73	101	3.90421e-05	4.39132e-05	123	184	2.84251e-06	3.14271e-06	61	99	0.0132626	0.0141749
8908	2036	80	105	1.36332e-09	1.67029e-09	63	101	0.0252211	0.0266484	121	184	1.143e-05	1.25445e-05	63	99	0.00431679	0.00467401
8908	6495	62	105	0.0140447	0.0150406	72	101	8.91786e-05	9.96279e-05	112	184	0.00195873	0.00208281	60	99	0.0219376	0.0232981
8908	8438	61	105	0.023022	0.0244983	84	101	2.07852e-10	2.55444e-10	109	184	0.00737886	0.00776747	62	99	0.00771618	0.00830041
8908	9156	70	105	6.54112e-05	7.39024e-05	71	101	0.00019535	0.000216795	122	184	5.7669e-06	6.35241e-06	65	99	0.00119731	0.00131381
8908	81554	68	105	0.000320624	0.000357209	65	101	0.00937046	0.0100175	107	184	0.0161212	0.0168581	64	99	0.00232033	0.00252904
8945	10612	61	105	0.023022	0.0244983	78	101	3.24486e-07	3.78549e-07	104	184	0.0448459	0.0464374	60	99	0.0219376	0.0232981
9014	9518	70	105	6.54112e-05	7.39024e-05	64	101	0.0156509	0.0166332	108	184	0.0110176	0.0115594	60	99	0.0219376	0.0232981
9016	22974	66	105	0.00132689	0.00145842	68	101	0.00161049	0.00175337	121	184	1.143e-05	1.25445e-05	60	99	0.0219376	0.0232981
9020	51512	66	105	0.00132689	0.00145842	66	101	0.00540895	0.00581717	105	184	0.0325163	0.0337801	61	99	0.0132626	0.0141749
9050	10112	73	105	4.31789e-06	4.9874e-06	71	101	0.00019535	0.000216795	104	184	0.0448459	0.0464374	68	99	0.000127673	0.000143044
9057	11004	62	105	0.0140447	0.0150406	65	101	0.00937046	0.0100175	107	184	0.0161212	0.0168581	63	99	0.00431679	0.00467401
9073	2357	60	105	0.0363785	0.0384681	80	101	3.44038e-08	4.07902e-08	105	184	0.0325163	0.0337801	60	99	0.0219376	0.0232981
9073	3902	74	105	1.58994e-06	1.85065e-06	74	101	1.63777e-05	1.85491e-05	108	184	0.0110176	0.0115594	59	99	0.0349503	0.036885
9073	6518	68	105	0.000320624	0.000357209	84	101	2.07852e-10	2.55444e-10	107	184	0.0161212	0.0168581	60	99	0.0219376	0.0232981
9073	79140	64	105	0.00466752	0.00506319	82	101	2.97825e-09	3.59257e-09	112	184	0.00195873	0.00208281	59	99	0.0349503	0.036885
9073	84525	63	105	0.00825293	0.00889484	83	101	8.08977e-10	9.84799e-10	105	184	0.0325163	0.0337801	61	99	0.0132626	0.0141749
9076	923	75	105	5.57748e-07	6.54351e-07	64	101	0.0156509	0.0166332	106	184	0.0231224	0.0240998	60	99	0.0219376	0.0232981
9076	1063	73	105	4.31789e-06	4.9874e-06	73	101	3.90421e-05	4.39132e-05	113	184	0.00120708	0.00128795	61	99	0.0132626	0.0141749
9076	4705	68	105	0.000320624	0.000357209	77	101	9.26738e-07	1.07285e-06	105	184	0.0325163	0.0337801	60	99	0.0219376	0.0232981
9076	84900	68	105	0.000320624	0.000357209	77	101	9.26738e-07	1.07285e-06	108	184	0.0110176	0.0115594	61	99	0.0132626	0.0141749
9077	6698	65	105	0.00253869	0.00277197	70	101	0.000410726	0.000452856	114	184	0.00072815	0.000779611	69	99	5.54702e-05	6.25983e-05
9079	9133	62	105	0.0140447	0.0150406	74	101	1.63777e-05	1.85491e-05	112	184	0.00195873	0.00208281	60	99	0.0219376	0.0232981
9107	10112	60	105	0.0363785	0.0384681	85	101	5.0415e-11	6.25788e-11	105	184	0.0325163	0.0337801	65	99	0.00119731	0.00131381
9107	23404	62	105	0.0140447	0.0150406	88	101	4.97602e-13	6.37782e-13	104	184	0.0448459	0.0464374	59	99	0.0349503	0.036885
9118	51350	61	105	0.023022	0.0244983	68	101	0.00161049	0.00175337	110	184	0.00484178	0.00511387	61	99	0.0132626	0.0141749
9121	10460	61	105	0.023022	0.0244983	82	101	2.97825e-09	3.59257e-09	107	184	0.0161212	0.0168581	60	99	0.0219376	0.0232981
9122	2305	66	105	0.00132689	0.00145842	81	101	1.03899e-08	1.24234e-08	105	184	0.0325163	0.0337801	63	99	0.00431679	0.00467401
9122	24137	65	105	0.00253869	0.00277197	72	101	8.91786e-05	9.96279e-05	104	184	0.0448459	0.0464374	68	99	0.000127673	0.000143044
9126	9319	60	105	0.0363785	0.0384681	86	101	1.15188e-11	1.44453e-11	107	184	0.0161212	0.0168581	62	99	0.00771618	0.00830041
9166	11065	82	105	8.29385e-11	1.03643e-10	77	101	9.26738e-07	1.07285e-06	111	184	0.00311195	0.00329793	59	99	0.0349503	0.036885
9182	651	60	105	0.0363785	0.0384681	90	101	1.64313e-14	2.15699e-14	105	184	0.0325163	0.0337801	68	99	0.000127673	0.000143044
9187	55355	60	105	0.0363785	0.0384681	77	101	9.26738e-07	1.07285e-06	107	184	0.0161212	0.0168581	66	99	0.000592616	0.000654728
9189	404093	68	105	0.000320624	0.000357209	68	101	0.00161049	0.00175337	108	184	0.0110176	0.0115594	66	99	0.000592616	0.000654728
9201	11329	60	105	0.0363785	0.0384681	74	101	1.63777e-05	1.85491e-05	105	184	0.0325163	0.0337801	63	99	0.00431679	0.00467401
9218	5724	65	105	0.00253869	0.00277197	65	101	0.00937046	0.0100175	108	184	0.0110176	0.0115594	71	99	9.1288e-06	1.04559e-05
9218	84818	65	105	0.00253869	0.00277197	75	101	6.57684e-06	7.50204e-06	104	184	0.0448459	0.0464374	62	99	0.00771618	0.00830041
9236	10058	61	105	0.023022	0.0244983	92	101	4.44089e-16	5.98775e-16	107	184	0.0161212	0.0168581	59	99	0.0349503	0.036885
9252	11004	68	105	0.000320624	0.000357209	63	101	0.0252211	0.0266484	106	184	0.0231224	0.0240998	61	99	0.0132626	0.0141749
9370	360	71	105	2.76654e-05	3.14833e-05	64	101	0.0156509	0.0166332	117	184	0.000140311	0.000151805	62	99	0.00771618	0.00830041
9370	701	69	105	0.00014798	0.000166015	69	101	0.000829513	0.000908777	109	184	0.00737886	0.00776747	61	99	0.0132626	0.0141749
9370	1656	67	105	0.000665913	0.000736853	63	101	0.0252211	0.0266484	109	184	0.00737886	0.00776747	59	99	0.0349503	0.036885
9370	1663	75	105	5.57748e-07	6.54351e-07	65	101	0.00937046	0.0100175	106	184	0.0231224	0.0240998	62	99	0.00771618	0.00830041
9370	2188	71	105	2.76654e-05	3.14833e-05	67	101	0.00300804	0.00325475	108	184	0.0110176	0.0115594	63	99	0.00431679	0.00467401
9370	2355	65	105	0.00253869	0.00277197	69	101	0.000829513	0.000908777	105	184	0.0325163	0.0337801	59	99	0.0349503	0.036885
9370	3383	78	105	1.77603e-08	2.13665e-08	62	101	0.0392425	0.0412253	104	184	0.0448459	0.0464374	65	99	0.00119731	0.00131381
9370	5128	76	105	1.86157e-07	2.20183e-07	65	101	0.00937046	0.0100175	116	184	0.000248309	0.000267709	59	99	0.0349503	0.036885
9370	5810	62	105	0.0140447	0.0150406	66	101	0.00540895	0.00581717	106	184	0.0231224	0.0240998	61	99	0.0132626	0.0141749
9370	27037	72	105	1.11848e-05	1.28222e-05	64	101	0.0156509	0.0166332	111	184	0.00311195	0.00329793	59	99	0.0349503	0.036885
9370	29882	67	105	0.000665913	0.000736853	71	101	0.00019535	0.000216795	105	184	0.0325163	0.0337801	63	99	0.00431679	0.00467401
9370	79874	63	105	0.00825293	0.00889484	70	101	0.000410726	0.000452856	109	184	0.00737886	0.00776747	61	99	0.0132626	0.0141749
9370	81839	69	105	0.00014798	0.000166015	65	101	0.00937046	0.0100175	108	184	0.0110176	0.0115594	61	99	0.0132626	0.0141749
9399	3297	68	105	0.000320624	0.000357209	72	101	8.91786e-05	9.96279e-05	108	184	0.0110176	0.0115594	59	99	0.0349503	0.036885
9413	2068	60	105	0.0363785	0.0384681	63	101	0.0252211	0.0266484	113	184	0.00120708	0.00128795	64	99	0.00232033	0.00252904
9413	4486	62	105	0.0140447	0.0150406	74	101	1.63777e-05	1.85491e-05	108	184	0.0110176	0.0115594	62	99	0.00771618	0.00830041
9413	4665	64	105	0.00466752	0.00506319	66	101	0.00540895	0.00581717	120	184	2.21368e-05	2.42074e-05	64	99	0.00232033	0.00252904
9413	4940	66	105	0.00132689	0.00145842	70	101	0.000410726	0.000452856	115	184	0.00042987	0.000461845	65	99	0.00119731	0.00131381
9413	5914	61	105	0.023022	0.0244983	68	101	0.00161049	0.00175337	110	184	0.00484178	0.00511387	70	99	2.30312e-05	2.61823e-05
9413	7186	60	105	0.0363785	0.0384681	64	101	0.0156509	0.0166332	110	184	0.00484178	0.00511387	66	99	0.000592616	0.000654728
9413	7693	62	105	0.0140447	0.0150406	63	101	0.0252211	0.0266484	115	184	0.00042987	0.000461845	66	99	0.000592616	0.000654728
9413	8506	68	105	0.000320624	0.000357209	62	101	0.0392425	0.0412253	123	184	2.84251e-06	3.14271e-06	60	99	0.0219376	0.0232981
9413	9700	61	105	0.023022	0.0244983	75	101	6.57684e-06	7.50204e-06	112	184	0.00195873	0.00208281	70	99	2.30312e-05	2.61823e-05
9413	10024	65	105	0.00253869	0.00277197	62	101	0.0392425	0.0412253	110	184	0.00484178	0.00511387	74	99	4.253e-07	4.98738e-07
9413	23529	68	105	0.000320624	0.000357209	67	101	0.00300804	0.00325475	115	184	0.00042987	0.000461845	64	99	0.00232033	0.00252904
9413	54913	62	105	0.0140447	0.0150406	62	101	0.0392425	0.0412253	114	184	0.00072815	0.000779611	59	99	0.0349503	0.036885
9413	80178	72	105	1.11848e-05	1.28222e-05	62	101	0.0392425	0.0412253	107	184	0.0161212	0.0168581	73	99	1.24206e-06	1.44489e-06
9413	83461	61	105	0.023022	0.0244983	72	101	8.91786e-05	9.96279e-05	115	184	0.00042987	0.000461845	64	99	0.00232033	0.00252904
9419	3148	62	105	0.0140447	0.0150406	76	101	2.52582e-06	2.90225e-06	108	184	0.0110176	0.0115594	61	99	0.0132626	0.0141749
9425	3069	70	105	6.54112e-05	7.39024e-05	62	101	0.0392425	0.0412253	104	184	0.0448459	0.0464374	60	99	0.0219376	0.0232981
9439	55143	65	105	0.00253869	0.00277197	77	101	9.26738e-07	1.07285e-06	116	184	0.000248309	0.000267709	59	99	0.0349503	0.036885
9443	79019	74	105	1.58994e-06	1.85065e-06	69	101	0.000829513	0.000908777	106	184	0.0231224	0.0240998	72	99	3.45035e-06	3.98241e-06
9443	83461	66	105	0.00132689	0.00145842	83	101	8.08977e-10	9.84799e-10	111	184	0.00311195	0.00329793	64	99	0.00232033	0.00252904
9451	5833	60	105	0.0363785	0.0384681	66	101	0.00540895	0.00581717	105	184	0.0325163	0.0337801	61	99	0.0132626	0.0141749
9451	24137	63	105	0.00825293	0.00889484	63	101	0.0252211	0.0266484	117	184	0.000140311	0.000151805	60	99	0.0219376	0.0232981
9452	6737	83	105	1.8644e-11	2.35492e-11	66	101	0.00540895	0.00581717	105	184	0.0325163	0.0337801	63	99	0.00431679	0.00467401
9452	9170	84	105	3.92597e-12	5.01401e-12	63	101	0.0252211	0.0266484	104	184	0.0448459	0.0464374	61	99	0.0132626	0.0141749
9452	51172	80	105	1.36332e-09	1.67029e-09	64	101	0.0156509	0.0166332	107	184	0.0161212	0.0168581	59	99	0.0349503	0.036885
9452	64419	86	105	1.41331e-13	1.84775e-13	63	101	0.0252211	0.0266484	104	184	0.0448459	0.0464374	59	99	0.0349503	0.036885
9459	8884	65	105	0.00253869	0.00277197	75	101	6.57684e-06	7.50204e-06	112	184	0.00195873	0.00208281	62	99	0.00771618	0.00830041
9474	9833	66	105	0.00132689	0.00145842	71	101	0.00019535	0.000216795	111	184	0.00311195	0.00329793	62	99	0.00771618	0.00830041
9474	54542	78	105	1.77603e-08	2.13665e-08	65	101	0.00937046	0.0100175	104	184	0.0448459	0.0464374	60	99	0.0219376	0.0232981
9487	79847	63	105	0.00825293	0.00889484	81	101	1.03899e-08	1.24234e-08	105	184	0.0325163	0.0337801	66	99	0.000592616	0.000654728
9488	10682	70	105	6.54112e-05	7.39024e-05	62	101	0.0392425	0.0412253	113	184	0.00120708	0.00128795	64	99	0.00232033	0.00252904
9512	27301	71	105	2.76654e-05	3.14833e-05	62	101	0.0392425	0.0412253	113	184	0.00120708	0.00128795	64	99	0.00232033	0.00252904
9529	22974	74	105	1.58994e-06	1.85065e-06	72	101	8.91786e-05	9.96279e-05	109	184	0.00737886	0.00776747	67	99	0.000281104	0.000312729
9534	6857	67	105	0.000665913	0.000736853	69	101	0.000829513	0.000908777	110	184	0.00484178	0.00511387	59	99	0.0349503	0.036885
9538	9232	78	105	1.77603e-08	2.13665e-08	64	101	0.0156509	0.0166332	108	184	0.0110176	0.0115594	67	99	0.000281104	0.000312729
9547	57680	67	105	0.000665913	0.000736853	70	101	0.000410726	0.000452856	113	184	0.00120708	0.00128795	61	99	0.0132626	0.0141749
9586	4656	68	105	0.000320624	0.000357209	69	101	0.000829513	0.000908777	117	184	0.000140311	0.000151805	64	99	0.00232033	0.00252904
9586	6939	60	105	0.0363785	0.0384681	82	101	2.97825e-09	3.59257e-09	107	184	0.0161212	0.0168581	61	99	0.0132626	0.0141749
9607	5365	62	105	0.0140447	0.0150406	80	101	3.44038e-08	4.07902e-08	116	184	0.000248309	0.000267709	60	99	0.0219376	0.0232981
9647	7153	64	105	0.00466752	0.00506319	66	101	0.00540895	0.00581717	113	184	0.00120708	0.00128795	64	99	0.00232033	0.00252904
9647	54820	72	105	1.11848e-05	1.28222e-05	73	101	3.90421e-05	4.39132e-05	106	184	0.0231224	0.0240998	70	99	2.30312e-05	2.61823e-05
9653	10518	70	105	6.54112e-05	7.39024e-05	72	101	8.91786e-05	9.96279e-05	109	184	0.00737886	0.00776747	61	99	0.0132626	0.0141749
9653	25806	79	105	5.06067e-09	6.14292e-09	66	101	0.00540895	0.00581717	107	184	0.0161212	0.0168581	61	99	0.0132626	0.0141749
9658	1760	63	105	0.00825293	0.00889484	75	101	6.57684e-06	7.50204e-06	105	184	0.0325163	0.0337801	64	99	0.00232033	0.00252904
9658	5129	65	105	0.00253869	0.00277197	62	101	0.0392425	0.0412253	121	184	1.143e-05	1.25445e-05	60	99	0.0219376	0.0232981
9658	5536	64	105	0.00466752	0.00506319	69	101	0.000829513	0.000908777	113	184	0.00120708	0.00128795	62	99	0.00771618	0.00830041
9659	3559	64	105	0.00466752	0.00506319	75	101	6.57684e-06	7.50204e-06	105	184	0.0325163	0.0337801	60	99	0.0219376	0.0232981
9669	1468	66	105	0.00132689	0.00145842	77	101	9.26738e-07	1.07285e-06	106	184	0.0231224	0.0240998	59	99	0.0349503	0.036885
9678	11004	61	105	0.023022	0.0244983	70	101	0.000410726	0.000452856	109	184	0.00737886	0.00776747	61	99	0.0132626	0.0141749
9705	50837	69	105	0.00014798	0.000166015	74	101	1.63777e-05	1.85491e-05	104	184	0.0448459	0.0464374	62	99	0.00771618	0.00830041
9731	332	78	105	1.77603e-08	2.13665e-08	62	101	0.0392425	0.0412253	111	184	0.00311195	0.00329793	59	99	0.0349503	0.036885
9743	375	63	105	0.00825293	0.00889484	73	101	3.90421e-05	4.39132e-05	109	184	0.00737886	0.00776747	62	99	0.00771618	0.00830041
9759	3925	77	105	5.9034e-08	7.04091e-08	63	101	0.0252211	0.0266484	109	184	0.00737886	0.00776747	66	99	0.000592616	0.000654728
9759	4597	61	105	0.023022	0.0244983	73	101	3.90421e-05	4.39132e-05	104	184	0.0448459	0.0464374	63	99	0.00431679	0.00467401
9759	23035	62	105	0.0140447	0.0150406	65	101	0.00937046	0.0100175	106	184	0.0231224	0.0240998	60	99	0.0219376	0.0232981
9759	80758	66	105	0.00132689	0.00145842	68	101	0.00161049	0.00175337	123	184	2.84251e-06	3.14271e-06	59	99	0.0349503	0.036885
9778	3221	62	105	0.0140447	0.0150406	75	101	6.57684e-06	7.50204e-06	115	184	0.00042987	0.000461845	68	99	0.000127673	0.000143044
9783	63892	67	105	0.000665913	0.000736853	62	101	0.0392425	0.0412253	130	184	1.02348e-08	1.1624e-08	60	99	0.0219376	0.0232981
9801	1058	70	105	6.54112e-05	7.39024e-05	63	101	0.0252211	0.0266484	106	184	0.0231224	0.0240998	61	99	0.0132626	0.0141749
9849	9810	60	105	0.0363785	0.0384681	72	101	8.91786e-05	9.96279e-05	108	184	0.0110176	0.0115594	61	99	0.0132626	0.0141749
9849	10024	68	105	0.000320624	0.000357209	64	101	0.0156509	0.0166332	125	184	6.43267e-07	7.16541e-07	62	99	0.00771618	0.00830041
9849	80178	70	105	6.54112e-05	7.39024e-05	66	101	0.00540895	0.00581717	122	184	5.7669e-06	6.35241e-06	65	99	0.00119731	0.00131381
9849	80196	62	105	0.0140447	0.0150406	63	101	0.0252211	0.0266484	108	184	0.0110176	0.0115594	61	99	0.0132626	0.0141749
9851	79690	67	105	0.000665913	0.000736853	67	101	0.00300804	0.00325475	107	184	0.0161212	0.0168581	65	99	0.00119731	0.00131381
9858	22974	71	105	2.76654e-05	3.14833e-05	64	101	0.0156509	0.0166332	109	184	0.00737886	0.00776747	70	99	2.30312e-05	2.61823e-05
9880	6712	70	105	6.54112e-05	7.39024e-05	78	101	3.24486e-07	3.78549e-07	114	184	0.00072815	0.000779611	63	99	0.00431679	0.00467401
9880	57332	75	105	5.57748e-07	6.54351e-07	64	101	0.0156509	0.0166332	109	184	0.00737886	0.00776747	61	99	0.0132626	0.0141749
9903	55040	60	105	0.0363785	0.0384681	65	101	0.00937046	0.0100175	108	184	0.0110176	0.0115594	67	99	0.000281104	0.000312729
9921	11065	65	105	0.00253869	0.00277197	71	101	0.00019535	0.000216795	106	184	0.0231224	0.0240998	61	99	0.0132626	0.0141749
9949	332	63	105	0.00825293	0.00889484	74	101	1.63777e-05	1.85491e-05	111	184	0.00311195	0.00329793	59	99	0.0349503	0.036885
9967	79019	75	105	5.57748e-07	6.54351e-07	64	101	0.0156509	0.0166332	106	184	0.0231224	0.0240998	65	99	0.00119731	0.00131381
9967	83461	72	105	1.11848e-05	1.28222e-05	73	101	3.90421e-05	4.39132e-05	109	184	0.00737886	0.00776747	61	99	0.0132626	0.0141749
9976	6676	72	105	1.11848e-05	1.28222e-05	69	101	0.000829513	0.000908777	104	184	0.0448459	0.0464374	59	99	0.0349503	0.036885
9976	23154	64	105	0.00466752	0.00506319	78	101	3.24486e-07	3.78549e-07	107	184	0.0161212	0.0168581	60	99	0.0219376	0.0232981
9987	6520	66	105	0.00132689	0.00145842	69	101	0.000829513	0.000908777	105	184	0.0325163	0.0337801	59	99	0.0349503	0.036885
10006	3297	64	105	0.00466752	0.00506319	64	101	0.0156509	0.0166332	108	184	0.0110176	0.0115594	59	99	0.0349503	0.036885
10006	83461	66	105	0.00132689	0.00145842	64	101	0.0156509	0.0166332	105	184	0.0325163	0.0337801	65	99	0.00119731	0.00131381
10010	24137	70	105	6.54112e-05	7.39024e-05	62	101	0.0392425	0.0412253	111	184	0.00311195	0.00329793	60	99	0.0219376	0.0232981
10075	4839	60	105	0.0363785	0.0384681	84	101	2.07852e-10	2.55444e-10	108	184	0.0110176	0.0115594	59	99	0.0349503	0.036885
10111	9088	66	105	0.00132689	0.00145842	70	101	0.000410726	0.000452856	104	184	0.0448459	0.0464374	71	99	9.1288e-06	1.04559e-05
10149	284904	62	105	0.0140447	0.0150406	67	101	0.00300804	0.00325475	108	184	0.0110176	0.0115594	59	99	0.0349503	0.036885
10152	51514	65	105	0.00253869	0.00277197	62	101	0.0392425	0.0412253	106	184	0.0231224	0.0240998	60	99	0.0219376	0.0232981
10157	255057	72	105	1.11848e-05	1.28222e-05	66	101	0.00540895	0.00581717	104	184	0.0448459	0.0464374	59	99	0.0349503	0.036885
10158	83461	63	105	0.00825293	0.00889484	63	101	0.0252211	0.0266484	104	184	0.0448459	0.0464374	59	99	0.0349503	0.036885
10160	22974	71	105	2.76654e-05	3.14833e-05	63	101	0.0252211	0.0266484	107	184	0.0161212	0.0168581	66	99	0.000592616	0.000654728
10161	54552	67	105	0.000665913	0.000736853	71	101	0.00019535	0.000216795	105	184	0.0325163	0.0337801	63	99	0.00431679	0.00467401
10163	8535	65	105	0.00253869	0.00277197	72	101	8.91786e-05	9.96279e-05	109	184	0.00737886	0.00776747	64	99	0.00232033	0.00252904
10166	7170	61	105	0.023022	0.0244983	75	101	6.57684e-06	7.50204e-06	108	184	0.0110176	0.0115594	61	99	0.0132626	0.0141749
10179	2305	78	105	1.77603e-08	2.13665e-08	62	101	0.0392425	0.0412253	105	184	0.0325163	0.0337801	59	99	0.0349503	0.036885
10188	23457	61	105	0.023022	0.0244983	64	101	0.0156509	0.0166332	107	184	0.0161212	0.0168581	67	99	0.000281104	0.000312729
10200	1058	74	105	1.58994e-06	1.85065e-06	62	101	0.0392425	0.0412253	105	184	0.0325163	0.0337801	61	99	0.0132626	0.0141749
10208	8318	63	105	0.00825293	0.00889484	72	101	8.91786e-05	9.96279e-05	123	184	2.84251e-06	3.14271e-06	64	99	0.00232033	0.00252904
10224	5347	62	105	0.0140447	0.0150406	91	101	2.66454e-15	3.54344e-15	108	184	0.0110176	0.0115594	60	99	0.0219376	0.0232981
10229	83451	65	105	0.00253869	0.00277197	64	101	0.0156509	0.0166332	114	184	0.00072815	0.000779611	61	99	0.0132626	0.0141749
10231	79703	61	105	0.023022	0.0244983	73	101	3.90421e-05	4.39132e-05	112	184	0.00195873	0.00208281	61	99	0.0132626	0.0141749
10250	1509	63	105	0.00825293	0.00889484	64	101	0.0156509	0.0166332	104	184	0.0448459	0.0464374	62	99	0.00771618	0.00830041
10253	873	61	105	0.023022	0.0244983	70	101	0.000410726	0.000452856	108	184	0.0110176	0.0115594	59	99	0.0349503	0.036885
10253	9319	62	105	0.0140447	0.0150406	70	101	0.000410726	0.000452856	110	184	0.00484178	0.00511387	66	99	0.000592616	0.000654728
10253	10024	76	105	1.86157e-07	2.20183e-07	65	101	0.00937046	0.0100175	119	184	4.19033e-05	4.56583e-05	59	99	0.0349503	0.036885
10253	10112	73	105	4.31789e-06	4.9874e-06	70	101	0.000410726	0.000452856	105	184	0.0325163	0.0337801	69	99	5.54702e-05	6.25983e-05
10253	10146	61	105	0.023022	0.0244983	76	101	2.52582e-06	2.90225e-06	106	184	0.0231224	0.0240998	65	99	0.00119731	0.00131381
10253	10241	71	105	2.76654e-05	3.14833e-05	71	101	0.00019535	0.000216795	104	184	0.0448459	0.0464374	69	99	5.54702e-05	6.25983e-05
10253	10712	75	105	5.57748e-07	6.54351e-07	69	101	0.000829513	0.000908777	109	184	0.00737886	0.00776747	60	99	0.0219376	0.0232981
10253	10775	69	105	0.00014798	0.000166015	76	101	2.52582e-06	2.90225e-06	110	184	0.00484178	0.00511387	59	99	0.0349503	0.036885
10253	23299	65	105	0.00253869	0.00277197	76	101	2.52582e-06	2.90225e-06	108	184	0.0110176	0.0115594	60	99	0.0219376	0.0232981
10253	55832	71	105	2.76654e-05	3.14833e-05	71	101	0.00019535	0.000216795	113	184	0.00120708	0.00128795	62	99	0.00771618	0.00830041
10253	57019	63	105	0.00825293	0.00889484	77	101	9.26738e-07	1.07285e-06	114	184	0.00072815	0.000779611	59	99	0.0349503	0.036885
10253	60489	71	105	2.76654e-05	3.14833e-05	65	101	0.00937046	0.0100175	110	184	0.00484178	0.00511387	65	99	0.00119731	0.00131381
10254	10024	69	105	0.00014798	0.000166015	72	101	8.91786e-05	9.96279e-05	105	184	0.0325163	0.0337801	59	99	0.0349503	0.036885
10279	6712	63	105	0.00825293	0.00889484	86	101	1.15188e-11	1.44453e-11	110	184	0.00484178	0.00511387	62	99	0.00771618	0.00830041
10279	8438	68	105	0.000320624	0.000357209	80	101	3.44038e-08	4.07902e-08	106	184	0.0231224	0.0240998	59	99	0.0349503	0.036885
10279	9156	71	105	2.76654e-05	3.14833e-05	68	101	0.00161049	0.00175337	111	184	0.00311195	0.00329793	59	99	0.0349503	0.036885
10279	25852	62	105	0.0140447	0.0150406	63	101	0.0252211	0.0266484	106	184	0.0231224	0.0240998	61	99	0.0132626	0.0141749
10279	51360	61	105	0.023022	0.0244983	67	101	0.00300804	0.00325475	105	184	0.0325163	0.0337801	60	99	0.0219376	0.0232981
10279	85021	62	105	0.0140447	0.0150406	79	101	1.08293e-07	1.27345e-07	105	184	0.0325163	0.0337801	59	99	0.0349503	0.036885
10302	83461	73	105	4.31789e-06	4.9874e-06	62	101	0.0392425	0.0412253	109	184	0.00737886	0.00776747	63	99	0.00431679	0.00467401
10324	2491	60	105	0.0363785	0.0384681	62	101	0.0392425	0.0412253	115	184	0.00042987	0.000461845	62	99	0.00771618	0.00830041
10329	51337	66	105	0.00132689	0.00145842	69	101	0.000829513	0.000908777	104	184	0.0448459	0.0464374	64	99	0.00232033	0.00252904
10413	9055	75	105	5.57748e-07	6.54351e-07	63	101	0.0252211	0.0266484	106	184	0.0231224	0.0240998	67	99	0.000281104	0.000312729
10413	9232	70	105	6.54112e-05	7.39024e-05	68	101	0.00161049	0.00175337	106	184	0.0231224	0.0240998	66	99	0.000592616	0.000654728
10464	3954	69	105	0.00014798	0.000166015	80	101	3.44038e-08	4.07902e-08	104	184	0.0448459	0.0464374	60	99	0.0219376	0.0232981
10464	51514	75	105	5.57748e-07	6.54351e-07	73	101	3.90421e-05	4.39132e-05	115	184	0.00042987	0.000461845	62	99	0.00771618	0.00830041
10468	10112	73	105	4.31789e-06	4.9874e-06	64	101	0.0156509	0.0166332	116	184	0.000248309	0.000267709	59	99	0.0349503	0.036885
10539	10112	62	105	0.0140447	0.0150406	72	101	8.91786e-05	9.96279e-05	112	184	0.00195873	0.00208281	61	99	0.0132626	0.0141749
10544	54913	66	105	0.00132689	0.00145842	77	101	9.26738e-07	1.07285e-06	109	184	0.00737886	0.00776747	61	99	0.0132626	0.0141749
10556	3882	61	105	0.023022	0.0244983	89	101	9.35918e-14	1.21361e-13	111	184	0.00311195	0.00329793	62	99	0.00771618	0.00830041
10568	7369	76	105	1.86157e-07	2.20183e-07	71	101	0.00019535	0.000216795	106	184	0.0231224	0.0240998	60	99	0.0219376	0.0232981
10568	9283	77	105	5.9034e-08	7.04091e-08	62	101	0.0392425	0.0412253	122	184	5.7669e-06	6.35241e-06	60	99	0.0219376	0.0232981
10607	55143	63	105	0.00825293	0.00889484	69	101	0.000829513	0.000908777	106	184	0.0231224	0.0240998	59	99	0.0349503	0.036885
10631	9232	68	105	0.000320624	0.000357209	68	101	0.00161049	0.00175337	104	184	0.0448459	0.0464374	64	99	0.00232033	0.00252904
10633	79847	67	105	0.000665913	0.000736853	70	101	0.000410726	0.000452856	104	184	0.0448459	0.0464374	64	99	0.00232033	0.00252904
10640	2305	61	105	0.023022	0.0244983	72	101	8.91786e-05	9.96279e-05	107	184	0.0161212	0.0168581	64	99	0.00232033	0.00252904
10656	10461	70	105	6.54112e-05	7.39024e-05	63	101	0.0252211	0.0266484	108	184	0.0110176	0.0115594	59	99	0.0349503	0.036885
10668	7298	65	105	0.00253869	0.00277197	83	101	8.08977e-10	9.84799e-10	105	184	0.0325163	0.0337801	61	99	0.0132626	0.0141749
10675	993	69	105	0.00014798	0.000166015	78	101	3.24486e-07	3.78549e-07	105	184	0.0325163	0.0337801	60	99	0.0219376	0.0232981
10691	10024	75	105	5.57748e-07	6.54351e-07	65	101	0.00937046	0.0100175	104	184	0.0448459	0.0464374	65	99	0.00119731	0.00131381
10693	2710	68	105	0.000320624	0.000357209	72	101	8.91786e-05	9.96279e-05	108	184	0.0110176	0.0115594	62	99	0.00771618	0.00830041
10693	3161	60	105	0.0363785	0.0384681	71	101	0.00019535	0.000216795	104	184	0.0448459	0.0464374	66	99	0.000592616	0.000654728
10693	79133	63	105	0.00825293	0.00889484	75	101	6.57684e-06	7.50204e-06	110	184	0.00484178	0.00511387	61	99	0.0132626	0.0141749
10738	22953	80	105	1.36332e-09	1.67029e-09	67	101	0.00300804	0.00325475	111	184	0.00311195	0.00329793	61	99	0.0132626	0.0141749
10742	11066	60	105	0.0363785	0.0384681	69	101	0.000829513	0.000908777	117	184	0.000140311	0.000151805	59	99	0.0349503	0.036885
10742	55679	65	105	0.00253869	0.00277197	65	101	0.00937046	0.0100175	113	184	0.00120708	0.00128795	59	99	0.0349503	0.036885
10785	55355	71	105	2.76654e-05	3.14833e-05	64	101	0.0156509	0.0166332	108	184	0.0110176	0.0115594	59	99	0.0349503	0.036885
10793	50804	62	105	0.0140447	0.0150406	65	101	0.00937046	0.0100175	112	184	0.00195873	0.00208281	60	99	0.0219376	0.0232981
10795	23397	68	105	0.000320624	0.000357209	72	101	8.91786e-05	9.96279e-05	107	184	0.0161212	0.0168581	61	99	0.0132626	0.0141749
10795	80351	62	105	0.0140447	0.0150406	74	101	1.63777e-05	1.85491e-05	105	184	0.0325163	0.0337801	62	99	0.00771618	0.00830041
10810	55765	63	105	0.00825293	0.00889484	68	101	0.00161049	0.00175337	106	184	0.0231224	0.0240998	61	99	0.0132626	0.0141749
10840	4656	65	105	0.00253869	0.00277197	76	101	2.52582e-06	2.90225e-06	108	184	0.0110176	0.0115594	62	99	0.00771618	0.00830041
10840	55220	72	105	1.11848e-05	1.28222e-05	70	101	0.000410726	0.000452856	105	184	0.0325163	0.0337801	64	99	0.00232033	0.00252904
10840	79152	71	105	2.76654e-05	3.14833e-05	69	101	0.000829513	0.000908777	106	184	0.0231224	0.0240998	62	99	0.00771618	0.00830041
10882	6698	61	105	0.023022	0.0244983	64	101	0.0156509	0.0166332	111	184	0.00311195	0.00329793	60	99	0.0219376	0.0232981
10902	10112	63	105	0.00825293	0.00889484	65	101	0.00937046	0.0100175	106	184	0.0231224	0.0240998	63	99	0.00431679	0.00467401
10905	1062	65	105	0.00253869	0.00277197	68	101	0.00161049	0.00175337	104	184	0.0448459	0.0464374	61	99	0.0132626	0.0141749
10905	54478	62	105	0.0140447	0.0150406	79	101	1.08293e-07	1.27345e-07	113	184	0.00120708	0.00128795	63	99	0.00431679	0.00467401
10921	2052	65	105	0.00253869	0.00277197	74	101	1.63777e-05	1.85491e-05	107	184	0.0161212	0.0168581	60	99	0.0219376	0.0232981
11012	79890	70	105	6.54112e-05	7.39024e-05	74	101	1.63777e-05	1.85491e-05	107	184	0.0161212	0.0168581	60	99	0.0219376	0.0232981
11019	1515	65	105	0.00253869	0.00277197	73	101	3.90421e-05	4.39132e-05	106	184	0.0231224	0.0240998	59	99	0.0349503	0.036885
11043	51514	67	105	0.000665913	0.000736853	65	101	0.00937046	0.0100175	104	184	0.0448459	0.0464374	59	99	0.0349503	0.036885
11069	344	71	105	2.76654e-05	3.14833e-05	74	101	1.63777e-05	1.85491e-05	114	184	0.00072815	0.000779611	59	99	0.0349503	0.036885
11069	9205	61	105	0.023022	0.0244983	79	101	1.08293e-07	1.27345e-07	106	184	0.0231224	0.0240998	59	99	0.0349503	0.036885
11069	51806	61	105	0.023022	0.0244983	80	101	3.44038e-08	4.07902e-08	118	184	7.75427e-05	8.4191e-05	59	99	0.0349503	0.036885
11069	55704	73	105	4.31789e-06	4.9874e-06	66	101	0.00540895	0.00581717	110	184	0.00484178	0.00511387	67	99	0.000281104	0.000312729
11069	79230	75	105	5.57748e-07	6.54351e-07	69	101	0.000829513	0.000908777	104	184	0.0448459	0.0464374	60	99	0.0219376	0.0232981
11081	1756	65	105	0.00253869	0.00277197	86	101	1.15188e-11	1.44453e-11	107	184	0.0161212	0.0168581	59	99	0.0349503	0.036885
11081	81543	78	105	1.77603e-08	2.13665e-08	76	101	2.52582e-06	2.90225e-06	105	184	0.0325163	0.0337801	61	99	0.0132626	0.0141749
11095	105	73	105	4.31789e-06	4.9874e-06	71	101	0.00019535	0.000216795	105	184	0.0325163	0.0337801	67	99	0.000281104	0.000312729
11095	4843	60	105	0.0363785	0.0384681	91	101	2.66454e-15	3.54344e-15	116	184	0.000248309	0.000267709	59	99	0.0349503	0.036885
11095	7827	69	105	0.00014798	0.000166015	79	101	1.08293e-07	1.27345e-07	109	184	0.00737886	0.00776747	62	99	0.00771618	0.00830041
11095	26280	74	105	1.58994e-06	1.85065e-06	79	101	1.08293e-07	1.27345e-07	107	184	0.0161212	0.0168581	67	99	0.000281104	0.000312729
11095	56475	71	105	2.76654e-05	3.14833e-05	66	101	0.00540895	0.00581717	111	184	0.00311195	0.00329793	64	99	0.00232033	0.00252904
11095	80032	62	105	0.0140447	0.0150406	64	101	0.0156509	0.0166332	116	184	0.000248309	0.000267709	61	99	0.0132626	0.0141749
11095	347853	74	105	1.58994e-06	1.85065e-06	74	101	1.63777e-05	1.85491e-05	111	184	0.00311195	0.00329793	61	99	0.0132626	0.0141749
11096	8355	71	105	2.76654e-05	3.14833e-05	68	101	0.00161049	0.00175337	112	184	0.00195873	0.00208281	59	99	0.0349503	0.036885
11099	993	78	105	1.77603e-08	2.13665e-08	62	101	0.0392425	0.0412253	114	184	0.00072815	0.000779611	64	99	0.00232033	0.00252904
11099	6871	61	105	0.023022	0.0244983	67	101	0.00300804	0.00325475	104	184	0.0448459	0.0464374	68	99	0.000127673	0.000143044
11099	25822	63	105	0.00825293	0.00889484	72	101	8.91786e-05	9.96279e-05	111	184	0.00311195	0.00329793	61	99	0.0132626	0.0141749
11116	10024	73	105	4.31789e-06	4.9874e-06	68	101	0.00161049	0.00175337	111	184	0.00311195	0.00329793	68	99	0.000127673	0.000143044
11116	79019	69	105	0.00014798	0.000166015	66	101	0.00540895	0.00581717	119	184	4.19033e-05	4.56583e-05	63	99	0.00431679	0.00467401
11116	80178	73	105	4.31789e-06	4.9874e-06	71	101	0.00019535	0.000216795	108	184	0.0110176	0.0115594	67	99	0.000281104	0.000312729
11122	80131	61	105	0.023022	0.0244983	63	101	0.0252211	0.0266484	104	184	0.0448459	0.0464374	59	99	0.0349503	0.036885
11138	23060	60	105	0.0363785	0.0384681	67	101	0.00300804	0.00325475	109	184	0.00737886	0.00776747	59	99	0.0349503	0.036885
11146	54913	63	105	0.00825293	0.00889484	84	101	2.07852e-10	2.55444e-10	104	184	0.0448459	0.0464374	63	99	0.00431679	0.00467401
11146	55765	62	105	0.0140447	0.0150406	65	101	0.00937046	0.0100175	104	184	0.0448459	0.0464374	59	99	0.0349503	0.036885
11160	22974	70	105	6.54112e-05	7.39024e-05	72	101	8.91786e-05	9.96279e-05	104	184	0.0448459	0.0464374	61	99	0.0132626	0.0141749
11167	5977	65	105	0.00253869	0.00277197	74	101	1.63777e-05	1.85491e-05	113	184	0.00120708	0.00128795	59	99	0.0349503	0.036885
11170	5451	65	105	0.00253869	0.00277197	71	101	0.00019535	0.000216795	107	184	0.0161212	0.0168581	60	99	0.0219376	0.0232981
11170	55355	72	105	1.11848e-05	1.28222e-05	68	101	0.00161049	0.00175337	105	184	0.0325163	0.0337801	59	99	0.0349503	0.036885
11196	7298	73	105	4.31789e-06	4.9874e-06	70	101	0.000410726	0.000452856	107	184	0.0161212	0.0168581	68	99	0.000127673	0.000143044
11197	4342	65	105	0.00253869	0.00277197	67	101	0.00300804	0.00325475	110	184	0.00484178	0.00511387	62	99	0.00771618	0.00830041
11197	4606	60	105	0.0363785	0.0384681	70	101	0.000410726	0.000452856	104	184	0.0448459	0.0464374	60	99	0.0219376	0.0232981
11197	5455	77	105	5.9034e-08	7.04091e-08	62	101	0.0392425	0.0412253	121	184	1.143e-05	1.25445e-05	61	99	0.0132626	0.0141749
11197	7379	63	105	0.00825293	0.00889484	70	101	0.000410726	0.000452856	104	184	0.0448459	0.0464374	66	99	0.000592616	0.000654728
11197	9468	72	105	1.11848e-05	1.28222e-05	68	101	0.00161049	0.00175337	104	184	0.0448459	0.0464374	59	99	0.0349503	0.036885
11197	10660	61	105	0.023022	0.0244983	64	101	0.0156509	0.0166332	108	184	0.0110176	0.0115594	59	99	0.0349503	0.036885
11197	29767	61	105	0.023022	0.0244983	66	101	0.00540895	0.00581717	106	184	0.0231224	0.0240998	59	99	0.0349503	0.036885
11197	56300	63	105	0.00825293	0.00889484	72	101	8.91786e-05	9.96279e-05	108	184	0.0110176	0.0115594	59	99	0.0349503	0.036885
11200	24137	66	105	0.00132689	0.00145842	65	101	0.00937046	0.0100175	112	184	0.00195873	0.00208281	63	99	0.00431679	0.00467401
11201	80045	68	105	0.000320624	0.000357209	63	101	0.0252211	0.0266484	105	184	0.0325163	0.0337801	59	99	0.0349503	0.036885
11234	22974	75	105	5.57748e-07	6.54351e-07	75	101	6.57684e-06	7.50204e-06	108	184	0.0110176	0.0115594	65	99	0.00119731	0.00131381
11235	3838	65	105	0.00253869	0.00277197	82	101	2.97825e-09	3.59257e-09	127	184	1.32206e-07	1.48395e-07	59	99	0.0349503	0.036885
11253	10963	75	105	5.57748e-07	6.54351e-07	66	101	0.00540895	0.00581717	104	184	0.0448459	0.0464374	60	99	0.0219376	0.0232981
11254	10879	60	105	0.0363785	0.0384681	70	101	0.000410726	0.000452856	111	184	0.00311195	0.00329793	59	99	0.0349503	0.036885
11275	11066	77	105	5.9034e-08	7.04091e-08	68	101	0.00161049	0.00175337	105	184	0.0325163	0.0337801	61	99	0.0132626	0.0141749
11275	79690	76	105	1.86157e-07	2.20183e-07	77	101	9.26738e-07	1.07285e-06	122	184	5.7669e-06	6.35241e-06	61	99	0.0132626	0.0141749
11275	84619	77	105	5.9034e-08	7.04091e-08	75	101	6.57684e-06	7.50204e-06	112	184	0.00195873	0.00208281	59	99	0.0349503	0.036885
11275	283459	72	105	1.11848e-05	1.28222e-05	72	101	8.91786e-05	9.96279e-05	106	184	0.0231224	0.0240998	66	99	0.000592616	0.000654728
11321	9232	60	105	0.0363785	0.0384681	74	101	1.63777e-05	1.85491e-05	114	184	0.00072815	0.000779611	59	99	0.0349503	0.036885
22800	1033	63	105	0.00825293	0.00889484	68	101	0.00161049	0.00175337	128	184	5.7771e-08	6.50972e-08	59	99	0.0349503	0.036885
22800	54972	66	105	0.00132689	0.00145842	82	101	2.97825e-09	3.59257e-09	108	184	0.0110176	0.0115594	62	99	0.00771618	0.00830041
22808	2305	76	105	1.86157e-07	2.20183e-07	64	101	0.0156509	0.0166332	104	184	0.0448459	0.0464374	63	99	0.00431679	0.00467401
22835	2146	60	105	0.0363785	0.0384681	91	101	2.66454e-15	3.54344e-15	110	184	0.00484178	0.00511387	62	99	0.00771618	0.00830041
22835	51514	66	105	0.00132689	0.00145842	79	101	1.08293e-07	1.27345e-07	109	184	0.00737886	0.00776747	68	99	0.000127673	0.000143044
22846	3224	63	105	0.00825293	0.00889484	64	101	0.0156509	0.0166332	119	184	4.19033e-05	4.56583e-05	64	99	0.00232033	0.00252904
22847	333	64	105	0.00466752	0.00506319	91	101	2.66454e-15	3.54344e-15	113	184	0.00120708	0.00128795	61	99	0.0132626	0.0141749
22847	27112	75	105	5.57748e-07	6.54351e-07	64	101	0.0156509	0.0166332	118	184	7.75427e-05	8.4191e-05	60	99	0.0219376	0.0232981
22847	27120	72	105	1.11848e-05	1.28222e-05	67	101	0.00300804	0.00325475	114	184	0.00072815	0.000779611	59	99	0.0349503	0.036885
22847	54825	65	105	0.00253869	0.00277197	78	101	3.24486e-07	3.78549e-07	105	184	0.0325163	0.0337801	60	99	0.0219376	0.0232981
22849	699	73	105	4.31789e-06	4.9874e-06	66	101	0.00540895	0.00581717	105	184	0.0325163	0.0337801	66	99	0.000592616	0.000654728
22862	332	64	105	0.00466752	0.00506319	80	101	3.44038e-08	4.07902e-08	114	184	0.00072815	0.000779611	63	99	0.00431679	0.00467401
22884	6790	70	105	6.54112e-05	7.39024e-05	78	101	3.24486e-07	3.78549e-07	115	184	0.00042987	0.000461845	64	99	0.00232033	0.00252904
22884	7296	61	105	0.023022	0.0244983	65	101	0.00937046	0.0100175	115	184	0.00042987	0.000461845	69	99	5.54702e-05	6.25983e-05
22884	57466	69	105	0.00014798	0.000166015	70	101	0.000410726	0.000452856	116	184	0.000248309	0.000267709	65	99	0.00119731	0.00131381
22885	4591	62	105	0.0140447	0.0150406	67	101	0.00300804	0.00325475	104	184	0.0448459	0.0464374	60	99	0.0219376	0.0232981
22885	9088	62	105	0.0140447	0.0150406	73	101	3.90421e-05	4.39132e-05	117	184	0.000140311	0.000151805	61	99	0.0132626	0.0141749
22885	11232	64	105	0.00466752	0.00506319	71	101	0.00019535	0.000216795	107	184	0.0161212	0.0168581	59	99	0.0349503	0.036885
22897	9700	68	105	0.000320624	0.000357209	74	101	1.63777e-05	1.85491e-05	105	184	0.0325163	0.0337801	66	99	0.000592616	0.000654728
22899	333	70	105	6.54112e-05	7.39024e-05	73	101	3.90421e-05	4.39132e-05	104	184	0.0448459	0.0464374	59	99	0.0349503	0.036885
22900	8318	64	105	0.00466752	0.00506319	70	101	0.000410726	0.000452856	105	184	0.0325163	0.0337801	65	99	0.00119731	0.00131381
22902	51514	68	105	0.000320624	0.000357209	64	101	0.0156509	0.0166332	113	184	0.00120708	0.00128795	62	99	0.00771618	0.00830041
22903	376267	66	105	0.00132689	0.00145842	69	101	0.000829513	0.000908777	106	184	0.0231224	0.0240998	62	99	0.00771618	0.00830041
22907	10112	60	105	0.0363785	0.0384681	68	101	0.00161049	0.00175337	110	184	0.00484178	0.00511387	59	99	0.0349503	0.036885
22918	5230	64	105	0.00466752	0.00506319	65	101	0.00937046	0.0100175	111	184	0.00311195	0.00329793	59	99	0.0349503	0.036885
22918	9948	70	105	6.54112e-05	7.39024e-05	78	101	3.24486e-07	3.78549e-07	104	184	0.0448459	0.0464374	64	99	0.00232033	0.00252904
22994	10024	62	105	0.0140447	0.0150406	66	101	0.00540895	0.00581717	108	184	0.0110176	0.0115594	60	99	0.0219376	0.0232981
23012	6241	64	105	0.00466752	0.00506319	73	101	3.90421e-05	4.39132e-05	105	184	0.0325163	0.0337801	67	99	0.000281104	0.000312729
23015	54919	62	105	0.0140447	0.0150406	63	101	0.0252211	0.0266484	104	184	0.0448459	0.0464374	61	99	0.0132626	0.0141749
23020	22974	64	105	0.00466752	0.00506319	67	101	0.00300804	0.00325475	106	184	0.0231224	0.0240998	72	99	3.45035e-06	3.98241e-06
23035	55176	81	105	3.46546e-10	4.28701e-10	65	101	0.00937046	0.0100175	110	184	0.00484178	0.00511387	61	99	0.0132626	0.0141749
23036	1263	75	105	5.57748e-07	6.54351e-07	65	101	0.00937046	0.0100175	107	184	0.0161212	0.0168581	61	99	0.0132626	0.0141749
23041	8914	68	105	0.000320624	0.000357209	82	101	2.97825e-09	3.59257e-09	123	184	2.84251e-06	3.14271e-06	64	99	0.00232033	0.00252904
23041	23649	61	105	0.023022	0.0244983	71	101	0.00019535	0.000216795	105	184	0.0325163	0.0337801	64	99	0.00232033	0.00252904
23052	10460	70	105	6.54112e-05	7.39024e-05	64	101	0.0156509	0.0166332	106	184	0.0231224	0.0240998	62	99	0.00771618	0.00830041
23078	79075	61	105	0.023022	0.0244983	71	101	0.00019535	0.000216795	116	184	0.000248309	0.000267709	61	99	0.0132626	0.0141749
23092	4656	60	105	0.0363785	0.0384681	89	101	9.35918e-14	1.21361e-13	105	184	0.0325163	0.0337801	62	99	0.00771618	0.00830041
23093	9212	63	105	0.00825293	0.00889484	69	101	0.000829513	0.000908777	110	184	0.00484178	0.00511387	62	99	0.00771618	0.00830041
23095	10112	70	105	6.54112e-05	7.39024e-05	65	101	0.00937046	0.0100175	112	184	0.00195873	0.00208281	68	99	0.000127673	0.000143044
23095	54542	62	105	0.0140447	0.0150406	72	101	8.91786e-05	9.96279e-05	110	184	0.00484178	0.00511387	60	99	0.0219376	0.0232981
23095	56731	65	105	0.00253869	0.00277197	77	101	9.26738e-07	1.07285e-06	110	184	0.00484178	0.00511387	59	99	0.0349503	0.036885
23096	55176	61	105	0.023022	0.0244983	73	101	3.90421e-05	4.39132e-05	112	184	0.00195873	0.00208281	64	99	0.00232033	0.00252904
23108	3159	64	105	0.00466752	0.00506319	66	101	0.00540895	0.00581717	105	184	0.0325163	0.0337801	59	99	0.0349503	0.036885
23111	5347	61	105	0.023022	0.0244983	87	101	2.47313e-12	3.13477e-12	104	184	0.0448459	0.0464374	65	99	0.00119731	0.00131381
23122	10024	65	105	0.00253869	0.00277197	64	101	0.0156509	0.0166332	113	184	0.00120708	0.00128795	65	99	0.00119731	0.00131381
23122	80178	62	105	0.0140447	0.0150406	68	101	0.00161049	0.00175337	107	184	0.0161212	0.0168581	60	99	0.0219376	0.0232981
23171	1509	69	105	0.00014798	0.000166015	65	101	0.00937046	0.0100175	112	184	0.00195873	0.00208281	59	99	0.0349503	0.036885
23179	9056	72	105	1.11848e-05	1.28222e-05	68	101	0.00161049	0.00175337	108	184	0.0110176	0.0115594	60	99	0.0219376	0.0232981
23179	9232	66	105	0.00132689	0.00145842	79	101	1.08293e-07	1.27345e-07	110	184	0.00484178	0.00511387	63	99	0.00431679	0.00467401
23200	23080	71	105	2.76654e-05	3.14833e-05	74	101	1.63777e-05	1.85491e-05	105	184	0.0325163	0.0337801	62	99	0.00771618	0.00830041
23200	56992	64	105	0.00466752	0.00506319	62	101	0.0392425	0.0412253	111	184	0.00311195	0.00329793	59	99	0.0349503	0.036885
23205	30012	61	105	0.023022	0.0244983	62	101	0.0392425	0.0412253	108	184	0.0110176	0.0115594	61	99	0.0132626	0.0141749
23221	6712	68	105	0.000320624	0.000357209	76	101	2.52582e-06	2.90225e-06	112	184	0.00195873	0.00208281	62	99	0.00771618	0.00830041
23221	8438	79	105	5.06067e-09	6.14292e-09	66	101	0.00540895	0.00581717	106	184	0.0231224	0.0240998	63	99	0.00431679	0.00467401
23229	5536	61	105	0.023022	0.0244983	71	101	0.00019535	0.000216795	108	184	0.0110176	0.0115594	63	99	0.00431679	0.00467401
23252	7975	60	105	0.0363785	0.0384681	66	101	0.00540895	0.00581717	104	184	0.0448459	0.0464374	59	99	0.0349503	0.036885
23253	9735	77	105	5.9034e-08	7.04091e-08	74	101	1.63777e-05	1.85491e-05	107	184	0.0161212	0.0168581	59	99	0.0349503	0.036885
23253	23475	72	105	1.11848e-05	1.28222e-05	64	101	0.0156509	0.0166332	105	184	0.0325163	0.0337801	62	99	0.00771618	0.00830041
23253	55705	79	105	5.06067e-09	6.14292e-09	65	101	0.00937046	0.0100175	105	184	0.0325163	0.0337801	60	99	0.0219376	0.0232981
23255	29882	61	105	0.023022	0.0244983	64	101	0.0156509	0.0166332	109	184	0.00737886	0.00776747	60	99	0.0219376	0.0232981
23261	5753	60	105	0.0363785	0.0384681	81	101	1.03899e-08	1.24234e-08	107	184	0.0161212	0.0168581	60	99	0.0219376	0.0232981
23261	55040	66	105	0.00132689	0.00145842	76	101	2.52582e-06	2.90225e-06	107	184	0.0161212	0.0168581	61	99	0.0132626	0.0141749
23264	6939	63	105	0.00825293	0.00889484	73	101	3.90421e-05	4.39132e-05	104	184	0.0448459	0.0464374	59	99	0.0349503	0.036885
23285	654	66	105	0.00132689	0.00145842	73	101	3.90421e-05	4.39132e-05	106	184	0.0231224	0.0240998	59	99	0.0349503	0.036885
23285	10855	60	105	0.0363785	0.0384681	76	101	2.52582e-06	2.90225e-06	121	184	1.143e-05	1.25445e-05	61	99	0.0132626	0.0141749
23285	53637	67	105	0.000665913	0.000736853	78	101	3.24486e-07	3.78549e-07	114	184	0.00072815	0.000779611	62	99	0.00771618	0.00830041
23293	4656	74	105	1.58994e-06	1.85065e-06	64	101	0.0156509	0.0166332	116	184	0.000248309	0.000267709	64	99	0.00232033	0.00252904
23294	9289	69	105	0.00014798	0.000166015	62	101	0.0392425	0.0412253	105	184	0.0325163	0.0337801	64	99	0.00232033	0.00252904
23301	6510	65	105	0.00253869	0.00277197	74	101	1.63777e-05	1.85491e-05	113	184	0.00120708	0.00128795	60	99	0.0219376	0.0232981
23303	9055	65	105	0.00253869	0.00277197	63	101	0.0252211	0.0266484	120	184	2.21368e-05	2.42074e-05	59	99	0.0349503	0.036885
23308	332	70	105	6.54112e-05	7.39024e-05	71	101	0.00019535	0.000216795	112	184	0.00195873	0.00208281	60	99	0.0219376	0.0232981
23315	83461	60	105	0.0363785	0.0384681	68	101	0.00161049	0.00175337	105	184	0.0325163	0.0337801	69	99	5.54702e-05	6.25983e-05
23324	9232	66	105	0.00132689	0.00145842	69	101	0.000829513	0.000908777	125	184	6.43267e-07	7.16541e-07	59	99	0.0349503	0.036885
23327	9409	66	105	0.00132689	0.00145842	76	101	2.52582e-06	2.90225e-06	105	184	0.0325163	0.0337801	59	99	0.0349503	0.036885
23327	55317	72	105	1.11848e-05	1.28222e-05	71	101	0.00019535	0.000216795	112	184	0.00195873	0.00208281	61	99	0.0132626	0.0141749
23336	9088	75	105	5.57748e-07	6.54351e-07	66	101	0.00540895	0.00581717	111	184	0.00311195	0.00329793	61	99	0.0132626	0.0141749
23347	7425	63	105	0.00825293	0.00889484	88	101	4.97602e-13	6.37782e-13	119	184	4.19033e-05	4.56583e-05	59	99	0.0349503	0.036885
23347	23210	64	105	0.00466752	0.00506319	63	101	0.0252211	0.0266484	108	184	0.0110176	0.0115594	67	99	0.000281104	0.000312729
23357	9260	61	105	0.023022	0.0244983	76	101	2.52582e-06	2.90225e-06	107	184	0.0161212	0.0168581	65	99	0.00119731	0.00131381
23362	126353	60	105	0.0363785	0.0384681	65	101	0.00937046	0.0100175	106	184	0.0231224	0.0240998	60	99	0.0219376	0.0232981
23366	4751	66	105	0.00132689	0.00145842	76	101	2.52582e-06	2.90225e-06	107	184	0.0161212	0.0168581	61	99	0.0132626	0.0141749
23368	6199	69	105	0.00014798	0.000166015	64	101	0.0156509	0.0166332	107	184	0.0161212	0.0168581	59	99	0.0349503	0.036885
23411	2960	65	105	0.00253869	0.00277197	70	101	0.000410726	0.000452856	112	184	0.00195873	0.00208281	59	99	0.0349503	0.036885
23411	4176	61	105	0.023022	0.0244983	92	101	4.44089e-16	5.98775e-16	104	184	0.0448459	0.0464374	60	99	0.0219376	0.0232981
23411	10535	65	105	0.00253869	0.00277197	74	101	1.63777e-05	1.85491e-05	107	184	0.0161212	0.0168581	66	99	0.000592616	0.000654728
23421	10535	68	105	0.000320624	0.000357209	71	101	0.00019535	0.000216795	104	184	0.0448459	0.0464374	60	99	0.0219376	0.0232981
23436	4656	63	105	0.00825293	0.00889484	75	101	6.57684e-06	7.50204e-06	113	184	0.00120708	0.00128795	59	99	0.0349503	0.036885
23446	396	60	105	0.0363785	0.0384681	87	101	2.47313e-12	3.13477e-12	104	184	0.0448459	0.0464374	60	99	0.0219376	0.0232981
23466	1365	61	105	0.023022	0.0244983	65	101	0.00937046	0.0100175	115	184	0.00042987	0.000461845	62	99	0.00771618	0.00830041
23498	5575	65	105	0.00253869	0.00277197	63	101	0.0252211	0.0266484	104	184	0.0448459	0.0464374	60	99	0.0219376	0.0232981
23548	6857	71	105	2.76654e-05	3.14833e-05	65	101	0.00937046	0.0100175	106	184	0.0231224	0.0240998	60	99	0.0219376	0.0232981
23607	3297	66	105	0.00132689	0.00145842	66	101	0.00540895	0.00581717	106	184	0.0231224	0.0240998	61	99	0.0132626	0.0141749
23607	83461	72	105	1.11848e-05	1.28222e-05	66	101	0.00540895	0.00581717	109	184	0.00737886	0.00776747	66	99	0.000592616	0.000654728
23708	1033	60	105	0.0363785	0.0384681	65	101	0.00937046	0.0100175	114	184	0.00072815	0.000779611	59	99	0.0349503	0.036885
23708	51742	67	105	0.000665913	0.000736853	65	101	0.00937046	0.0100175	105	184	0.0325163	0.0337801	59	99	0.0349503	0.036885
23764	9088	77	105	5.9034e-08	7.04091e-08	65	101	0.00937046	0.0100175	106	184	0.0231224	0.0240998	64	99	0.00232033	0.00252904
25776	11004	65	105	0.00253869	0.00277197	69	101	0.000829513	0.000908777	112	184	0.00195873	0.00208281	61	99	0.0132626	0.0141749
25801	51191	68	105	0.000320624	0.000357209	67	101	0.00300804	0.00325475	104	184	0.0448459	0.0464374	60	99	0.0219376	0.0232981
25888	51512	62	105	0.0140447	0.0150406	65	101	0.00937046	0.0100175	108	184	0.0110176	0.0115594	63	99	0.00431679	0.00467401
25895	8996	64	105	0.00466752	0.00506319	76	101	2.52582e-06	2.90225e-06	104	184	0.0448459	0.0464374	61	99	0.0132626	0.0141749
25901	9055	77	105	5.9034e-08	7.04091e-08	65	101	0.00937046	0.0100175	107	184	0.0161212	0.0168581	62	99	0.00771618	0.00830041
25901	9232	69	105	0.00014798	0.000166015	83	101	8.08977e-10	9.84799e-10	106	184	0.0231224	0.0240998	69	99	5.54702e-05	6.25983e-05
25901	9289	75	105	5.57748e-07	6.54351e-07	76	101	2.52582e-06	2.90225e-06	107	184	0.0161212	0.0168581	62	99	0.00771618	0.00830041
25949	7298	71	105	2.76654e-05	3.14833e-05	64	101	0.0156509	0.0166332	115	184	0.00042987	0.000461845	60	99	0.0219376	0.0232981
25950	9700	73	105	4.31789e-06	4.9874e-06	75	101	6.57684e-06	7.50204e-06	104	184	0.0448459	0.0464374	61	99	0.0132626	0.0141749
25950	83461	73	105	4.31789e-06	4.9874e-06	63	101	0.0252211	0.0266484	112	184	0.00195873	0.00208281	59	99	0.0349503	0.036885
25999	54552	62	105	0.0140447	0.0150406	66	101	0.00540895	0.00581717	113	184	0.00120708	0.00128795	63	99	0.00431679	0.00467401
26013	5365	69	105	0.00014798	0.000166015	73	101	3.90421e-05	4.39132e-05	107	184	0.0161212	0.0168581	62	99	0.00771618	0.00830041
26034	255057	62	105	0.0140447	0.0150406	72	101	8.91786e-05	9.96279e-05	113	184	0.00120708	0.00128795	60	99	0.0219376	0.0232981
26035	6713	73	105	4.31789e-06	4.9874e-06	63	101	0.0252211	0.0266484	106	184	0.0231224	0.0240998	59	99	0.0349503	0.036885
26035	7298	71	105	2.76654e-05	3.14833e-05	69	101	0.000829513	0.000908777	109	184	0.00737886	0.00776747	62	99	0.00771618	0.00830041
26035	51182	62	105	0.0140447	0.0150406	78	101	3.24486e-07	3.78549e-07	105	184	0.0325163	0.0337801	59	99	0.0349503	0.036885
26040	8140	66	105	0.00132689	0.00145842	63	101	0.0252211	0.0266484	105	184	0.0325163	0.0337801	62	99	0.00771618	0.00830041
26040	10445	63	105	0.00825293	0.00889484	65	101	0.00937046	0.0100175	109	184	0.00737886	0.00776747	61	99	0.0132626	0.0141749
26040	57192	64	105	0.00466752	0.00506319	62	101	0.0392425	0.0412253	113	184	0.00120708	0.00128795	62	99	0.00771618	0.00830041
26049	51350	62	105	0.0140447	0.0150406	71	101	0.00019535	0.000216795	104	184	0.0448459	0.0464374	60	99	0.0219376	0.0232981
26051	920	67	105	0.000665913	0.000736853	65	101	0.00937046	0.0100175	106	184	0.0231224	0.0240998	59	99	0.0349503	0.036885
26054	3297	71	105	2.76654e-05	3.14833e-05	67	101	0.00300804	0.00325475	112	184	0.00195873	0.00208281	60	99	0.0219376	0.0232981
26054	83461	75	105	5.57748e-07	6.54351e-07	67	101	0.00300804	0.00325475	108	184	0.0110176	0.0115594	61	99	0.0132626	0.0141749
26091	10721	60	105	0.0363785	0.0384681	72	101	8.91786e-05	9.96279e-05	107	184	0.0161212	0.0168581	59	99	0.0349503	0.036885
26206	6701	61	105	0.023022	0.0244983	63	101	0.0252211	0.0266484	104	184	0.0448459	0.0464374	59	99	0.0349503	0.036885
26263	332	69	105	0.00014798	0.000166015	64	101	0.0156509	0.0166332	106	184	0.0231224	0.0240998	61	99	0.0132626	0.0141749
26278	863	65	105	0.00253869	0.00277197	63	101	0.0252211	0.0266484	107	184	0.0161212	0.0168581	61	99	0.0132626	0.0141749
26278	2251	65	105	0.00253869	0.00277197	69	101	0.000829513	0.000908777	124	184	1.36842e-06	1.51858e-06	60	99	0.0219376	0.0232981
26278	4610	66	105	0.00132689	0.00145842	63	101	0.0252211	0.0266484	109	184	0.00737886	0.00776747	63	99	0.00431679	0.00467401
26278	50804	62	105	0.0140447	0.0150406	66	101	0.00540895	0.00581717	123	184	2.84251e-06	3.14271e-06	59	99	0.0349503	0.036885
26278	79869	61	105	0.023022	0.0244983	74	101	1.63777e-05	1.85491e-05	108	184	0.0110176	0.0115594	66	99	0.000592616	0.000654728
26289	3755	80	105	1.36332e-09	1.67029e-09	69	101	0.000829513	0.000908777	108	184	0.0110176	0.0115594	62	99	0.00771618	0.00830041
26289	4656	79	105	5.06067e-09	6.14292e-09	70	101	0.000410726	0.000452856	118	184	7.75427e-05	8.4191e-05	63	99	0.00431679	0.00467401
26289	6886	70	105	6.54112e-05	7.39024e-05	62	101	0.0392425	0.0412253	107	184	0.0161212	0.0168581	61	99	0.0132626	0.0141749
26289	6939	63	105	0.00825293	0.00889484	76	101	2.52582e-06	2.90225e-06	112	184	0.00195873	0.00208281	62	99	0.00771618	0.00830041
26289	8844	60	105	0.0363785	0.0384681	72	101	8.91786e-05	9.96279e-05	109	184	0.00737886	0.00776747	64	99	0.00232033	0.00252904
26289	55220	78	105	1.77603e-08	2.13665e-08	64	101	0.0156509	0.0166332	109	184	0.00737886	0.00776747	64	99	0.00232033	0.00252904
26289	55906	66	105	0.00132689	0.00145842	78	101	3.24486e-07	3.78549e-07	104	184	0.0448459	0.0464374	65	99	0.00119731	0.00131381
26289	79742	69	105	0.00014798	0.000166015	69	101	0.000829513	0.000908777	109	184	0.00737886	0.00776747	60	99	0.0219376	0.0232981
26289	80757	71	105	2.76654e-05	3.14833e-05	64	101	0.0156509	0.0166332	105	184	0.0325163	0.0337801	65	99	0.00119731	0.00131381
26512	8318	69	105	0.00014798	0.000166015	76	101	2.52582e-06	2.90225e-06	107	184	0.0161212	0.0168581	65	99	0.00119731	0.00131381
26575	84296	72	105	1.11848e-05	1.28222e-05	75	101	6.57684e-06	7.50204e-06	104	184	0.0448459	0.0464374	63	99	0.00431679	0.00467401
26577	11006	66	105	0.00132689	0.00145842	75	101	6.57684e-06	7.50204e-06	122	184	5.7669e-06	6.35241e-06	59	99	0.0349503	0.036885
26953	6241	63	105	0.00825293	0.00889484	69	101	0.000829513	0.000908777	117	184	0.000140311	0.000151805	63	99	0.00431679	0.00467401
26984	23649	61	105	0.023022	0.0244983	79	101	1.08293e-07	1.27345e-07	107	184	0.0161212	0.0168581	59	99	0.0349503	0.036885
27072	54972	60	105	0.0363785	0.0384681	78	101	3.24486e-07	3.78549e-07	107	184	0.0161212	0.0168581	59	99	0.0349503	0.036885
27095	22913	74	105	1.58994e-06	1.85065e-06	68	101	0.00161049	0.00175337	113	184	0.00120708	0.00128795	59	99	0.0349503	0.036885
27230	2052	67	105	0.000665913	0.000736853	80	101	3.44038e-08	4.07902e-08	104	184	0.0448459	0.0464374	61	99	0.0132626	0.0141749
27236	22974	82	105	8.29385e-11	1.03643e-10	66	101	0.00540895	0.00581717	106	184	0.0231224	0.0240998	59	99	0.0349503	0.036885
27285	255057	62	105	0.0140447	0.0150406	66	101	0.00540895	0.00581717	105	184	0.0325163	0.0337801	59	99	0.0349503	0.036885
27289	9088	65	105	0.00253869	0.00277197	68	101	0.00161049	0.00175337	111	184	0.00311195	0.00329793	59	99	0.0349503	0.036885
27303	9493	67	105	0.000665913	0.000736853	62	101	0.0392425	0.0412253	106	184	0.0231224	0.0240998	61	99	0.0132626	0.0141749
27330	7932	65	105	0.00253869	0.00277197	62	101	0.0392425	0.0412253	104	184	0.0448459	0.0464374	60	99	0.0219376	0.0232981
27345	332	64	105	0.00466752	0.00506319	68	101	0.00161049	0.00175337	111	184	0.00311195	0.00329793	60	99	0.0219376	0.0232981
29068	9088	65	105	0.00253869	0.00277197	86	101	1.15188e-11	1.44453e-11	116	184	0.000248309	0.000267709	61	99	0.0132626	0.0141749
29071	10024	74	105	1.58994e-06	1.85065e-06	68	101	0.00161049	0.00175337	112	184	0.00195873	0.00208281	59	99	0.0349503	0.036885
29071	80178	77	105	5.9034e-08	7.04091e-08	72	101	8.91786e-05	9.96279e-05	107	184	0.0161212	0.0168581	60	99	0.0219376	0.0232981
29078	1515	74	105	1.58994e-06	1.85065e-06	63	101	0.0252211	0.0266484	112	184	0.00195873	0.00208281	63	99	0.00431679	0.00467401
29110	9232	74	105	1.58994e-06	1.85065e-06	69	101	0.000829513	0.000908777	116	184	0.000248309	0.000267709	65	99	0.00119731	0.00131381
29123	10201	63	105	0.00825293	0.00889484	64	101	0.0156509	0.0166332	115	184	0.00042987	0.000461845	62	99	0.00771618	0.00830041
29842	24137	64	105	0.00466752	0.00506319	65	101	0.00937046	0.0100175	115	184	0.00042987	0.000461845	61	99	0.0132626	0.0141749
29906	22953	60	105	0.0363785	0.0384681	92	101	4.44089e-16	5.98775e-16	108	184	0.0110176	0.0115594	59	99	0.0349503	0.036885
50624	11045	60	105	0.0363785	0.0384681	77	101	9.26738e-07	1.07285e-06	107	184	0.0161212	0.0168581	63	99	0.00431679	0.00467401
50624	57211	61	105	0.023022	0.0244983	72	101	8.91786e-05	9.96279e-05	105	184	0.0325163	0.0337801	63	99	0.00431679	0.00467401
50937	6701	64	105	0.00466752	0.00506319	67	101	0.00300804	0.00325475	111	184	0.00311195	0.00329793	59	99	0.0349503	0.036885
50937	22953	63	105	0.00825293	0.00889484	79	101	1.08293e-07	1.27345e-07	105	184	0.0325163	0.0337801	66	99	0.000592616	0.000654728
51001	9232	73	105	4.31789e-06	4.9874e-06	73	101	3.90421e-05	4.39132e-05	104	184	0.0448459	0.0464374	62	99	0.00771618	0.00830041
51002	29127	71	105	2.76654e-05	3.14833e-05	72	101	8.91786e-05	9.96279e-05	104	184	0.0448459	0.0464374	59	99	0.0349503	0.036885
51065	1040	74	105	1.58994e-06	1.85065e-06	69	101	0.000829513	0.000908777	104	184	0.0448459	0.0464374	60	99	0.0219376	0.0232981
51074	6790	71	105	2.76654e-05	3.14833e-05	70	101	0.000410726	0.000452856	109	184	0.00737886	0.00776747	59	99	0.0349503	0.036885
51085	333	76	105	1.86157e-07	2.20183e-07	65	101	0.00937046	0.0100175	107	184	0.0161212	0.0168581	59	99	0.0349503	0.036885
51086	651	61	105	0.023022	0.0244983	91	101	2.66454e-15	3.54344e-15	105	184	0.0325163	0.0337801	66	99	0.000592616	0.000654728
51086	1142	72	105	1.11848e-05	1.28222e-05	66	101	0.00540895	0.00581717	104	184	0.0448459	0.0464374	64	99	0.00232033	0.00252904
51106	6790	63	105	0.00825293	0.00889484	81	101	1.03899e-08	1.24234e-08	111	184	0.00311195	0.00329793	63	99	0.00431679	0.00467401
51133	124583	71	105	2.76654e-05	3.14833e-05	62	101	0.0392425	0.0412253	117	184	0.000140311	0.000151805	60	99	0.0219376	0.0232981
51187	192286	72	105	1.11848e-05	1.28222e-05	68	101	0.00161049	0.00175337	106	184	0.0231224	0.0240998	60	99	0.0219376	0.0232981
51193	7480	72	105	1.11848e-05	1.28222e-05	69	101	0.000829513	0.000908777	112	184	0.00195873	0.00208281	60	99	0.0219376	0.0232981
51193	64405	71	105	2.76654e-05	3.14833e-05	73	101	3.90421e-05	4.39132e-05	106	184	0.0231224	0.0240998	59	99	0.0349503	0.036885
51205	10112	65	105	0.00253869	0.00277197	65	101	0.00937046	0.0100175	109	184	0.00737886	0.00776747	66	99	0.000592616	0.000654728
51232	5213	66	105	0.00132689	0.00145842	63	101	0.0252211	0.0266484	107	184	0.0161212	0.0168581	60	99	0.0219376	0.0232981
51257	3221	63	105	0.00825293	0.00889484	76	101	2.52582e-06	2.90225e-06	120	184	2.21368e-05	2.42074e-05	59	99	0.0349503	0.036885
51279	80023	63	105	0.00825293	0.00889484	79	101	1.08293e-07	1.27345e-07	118	184	7.75427e-05	8.4191e-05	61	99	0.0132626	0.0141749
51280	22974	60	105	0.0363785	0.0384681	75	101	6.57684e-06	7.50204e-06	120	184	2.21368e-05	2.42074e-05	59	99	0.0349503	0.036885
51285	55143	62	105	0.0140447	0.0150406	69	101	0.000829513	0.000908777	112	184	0.00195873	0.00208281	62	99	0.00771618	0.00830041
51285	83461	60	105	0.0363785	0.0384681	68	101	0.00161049	0.00175337	118	184	7.75427e-05	8.4191e-05	59	99	0.0349503	0.036885
51290	5165	65	105	0.00253869	0.00277197	72	101	8.91786e-05	9.96279e-05	104	184	0.0448459	0.0464374	60	99	0.0219376	0.0232981
51307	9232	69	105	0.00014798	0.000166015	75	101	6.57684e-06	7.50204e-06	104	184	0.0448459	0.0464374	69	99	5.54702e-05	6.25983e-05
51339	9088	62	105	0.0140447	0.0150406	72	101	8.91786e-05	9.96279e-05	105	184	0.0325163	0.0337801	59	99	0.0349503	0.036885
51364	332	63	105	0.00825293	0.00889484	68	101	0.00161049	0.00175337	105	184	0.0325163	0.0337801	64	99	0.00232033	0.00252904
51371	51282	61	105	0.023022	0.0244983	68	101	0.00161049	0.00175337	104	184	0.0448459	0.0464374	60	99	0.0219376	0.0232981
51375	11130	64	105	0.00466752	0.00506319	72	101	8.91786e-05	9.96279e-05	113	184	0.00120708	0.00128795	59	99	0.0349503	0.036885
51435	55176	70	105	6.54112e-05	7.39024e-05	67	101	0.00300804	0.00325475	108	184	0.0110176	0.0115594	66	99	0.000592616	0.000654728
51439	220988	72	105	1.11848e-05	1.28222e-05	70	101	0.000410726	0.000452856	110	184	0.00484178	0.00511387	59	99	0.0349503	0.036885
51444	1844	63	105	0.00825293	0.00889484	84	101	2.07852e-10	2.55444e-10	104	184	0.0448459	0.0464374	62	99	0.00771618	0.00830041
51447	11065	65	105	0.00253869	0.00277197	65	101	0.00937046	0.0100175	105	184	0.0325163	0.0337801	62	99	0.00771618	0.00830041
51533	993	70	105	6.54112e-05	7.39024e-05	76	101	2.52582e-06	2.90225e-06	123	184	2.84251e-06	3.14271e-06	59	99	0.0349503	0.036885
51554	2220	67	105	0.000665913	0.000736853	77	101	9.26738e-07	1.07285e-06	111	184	0.00311195	0.00329793	62	99	0.00771618	0.00830041
51562	890	66	105	0.00132689	0.00145842	66	101	0.00540895	0.00581717	112	184	0.00195873	0.00208281	65	99	0.00119731	0.00131381
51562	23457	64	105	0.00466752	0.00506319	78	101	3.24486e-07	3.78549e-07	121	184	1.143e-05	1.25445e-05	60	99	0.0219376	0.0232981
51562	79064	65	105	0.00253869	0.00277197	79	101	1.08293e-07	1.27345e-07	120	184	2.21368e-05	2.42074e-05	62	99	0.00771618	0.00830041
51621	5782	72	105	1.11848e-05	1.28222e-05	67	101	0.00300804	0.00325475	114	184	0.00072815	0.000779611	60	99	0.0219376	0.0232981
51621	10318	72	105	1.11848e-05	1.28222e-05	63	101	0.0252211	0.0266484	121	184	1.143e-05	1.25445e-05	59	99	0.0349503	0.036885
51621	55252	67	105	0.000665913	0.000736853	75	101	6.57684e-06	7.50204e-06	121	184	1.143e-05	1.25445e-05	62	99	0.00771618	0.00830041
51621	168544	69	105	0.00014798	0.000166015	65	101	0.00937046	0.0100175	106	184	0.0231224	0.0240998	60	99	0.0219376	0.0232981
51650	92140	60	105	0.0363785	0.0384681	72	101	8.91786e-05	9.96279e-05	109	184	0.00737886	0.00776747	59	99	0.0349503	0.036885
51665	9212	67	105	0.000665913	0.000736853	74	101	1.63777e-05	1.85491e-05	105	184	0.0325163	0.0337801	73	99	1.24206e-06	1.44489e-06
51700	83461	64	105	0.00466752	0.00506319	68	101	0.00161049	0.00175337	109	184	0.00737886	0.00776747	60	99	0.0219376	0.0232981
51705	80271	61	105	0.023022	0.0244983	81	101	1.03899e-08	1.24234e-08	104	184	0.0448459	0.0464374	62	99	0.00771618	0.00830041
51715	22974	62	105	0.0140447	0.0150406	84	101	2.07852e-10	2.55444e-10	114	184	0.00072815	0.000779611	61	99	0.0132626	0.0141749
51751	55715	67	105	0.000665913	0.000736853	69	101	0.000829513	0.000908777	108	184	0.0110176	0.0115594	59	99	0.0349503	0.036885
51761	993	63	105	0.00825293	0.00889484	87	101	2.47313e-12	3.13477e-12	106	184	0.0231224	0.0240998	60	99	0.0219376	0.0232981
51761	6698	67	105	0.000665913	0.000736853	74	101	1.63777e-05	1.85491e-05	115	184	0.00042987	0.000461845	63	99	0.00431679	0.00467401
51780	10367	65	105	0.00253869	0.00277197	62	101	0.0392425	0.0412253	107	184	0.0161212	0.0168581	63	99	0.00431679	0.00467401
53340	9133	83	105	1.8644e-11	2.35492e-11	63	101	0.0252211	0.0266484	105	184	0.0325163	0.0337801	63	99	0.00431679	0.00467401
53615	3833	63	105	0.00825293	0.00889484	73	101	3.90421e-05	4.39132e-05	104	184	0.0448459	0.0464374	63	99	0.00431679	0.00467401
53615	22974	64	105	0.00466752	0.00506319	72	101	8.91786e-05	9.96279e-05	104	184	0.0448459	0.0464374	64	99	0.00232033	0.00252904
53832	4751	68	105	0.000320624	0.000357209	72	101	8.91786e-05	9.96279e-05	110	184	0.00484178	0.00511387	59	99	0.0349503	0.036885
54093	51512	63	105	0.00825293	0.00889484	70	101	0.000410726	0.000452856	105	184	0.0325163	0.0337801	60	99	0.0219376	0.0232981
54205	22974	68	105	0.000320624	0.000357209	80	101	3.44038e-08	4.07902e-08	106	184	0.0231224	0.0240998	62	99	0.00771618	0.00830041
54431	57446	65	105	0.00253869	0.00277197	71	101	0.00019535	0.000216795	105	184	0.0325163	0.0337801	60	99	0.0219376	0.0232981
54436	11004	65	105	0.00253869	0.00277197	64	101	0.0156509	0.0166332	104	184	0.0448459	0.0464374	67	99	0.000281104	0.000312729
54468	1468	69	105	0.00014798	0.000166015	74	101	1.63777e-05	1.85491e-05	107	184	0.0161212	0.0168581	59	99	0.0349503	0.036885
54494	3227	60	105	0.0363785	0.0384681	71	101	0.00019535	0.000216795	104	184	0.0448459	0.0464374	59	99	0.0349503	0.036885
54494	8638	68	105	0.000320624	0.000357209	73	101	3.90421e-05	4.39132e-05	110	184	0.00484178	0.00511387	59	99	0.0349503	0.036885
54494	24137	70	105	6.54112e-05	7.39024e-05	62	101	0.0392425	0.0412253	112	184	0.00195873	0.00208281	68	99	0.000127673	0.000143044
54494	54069	63	105	0.00825293	0.00889484	70	101	0.000410726	0.000452856	115	184	0.00042987	0.000461845	59	99	0.0349503	0.036885
54554	22933	62	105	0.0140447	0.0150406	73	101	3.90421e-05	4.39132e-05	112	184	0.00195873	0.00208281	61	99	0.0132626	0.0141749
54555	10645	60	105	0.0363785	0.0384681	71	101	0.00019535	0.000216795	107	184	0.0161212	0.0168581	63	99	0.00431679	0.00467401
54556	8608	60	105	0.0363785	0.0384681	79	101	1.08293e-07	1.27345e-07	108	184	0.0110176	0.0115594	61	99	0.0132626	0.0141749
54558	54361	61	105	0.023022	0.0244983	79	101	1.08293e-07	1.27345e-07	112	184	0.00195873	0.00208281	59	99	0.0349503	0.036885
54585	8914	66	105	0.00132689	0.00145842	75	101	6.57684e-06	7.50204e-06	111	184	0.00311195	0.00329793	67	99	0.000281104	0.000312729
54622	54455	64	105	0.00466752	0.00506319	80	101	3.44038e-08	4.07902e-08	111	184	0.00311195	0.00329793	59	99	0.0349503	0.036885
54662	55129	64	105	0.00466752	0.00506319	63	101	0.0252211	0.0266484	106	184	0.0231224	0.0240998	75	99	1.38329e-07	1.63559e-07
54665	4860	69	105	0.00014798	0.000166015	62	101	0.0392425	0.0412253	117	184	0.000140311	0.000151805	60	99	0.0219376	0.0232981
54674	8973	68	105	0.000320624	0.000357209	72	101	8.91786e-05	9.96279e-05	104	184	0.0448459	0.0464374	62	99	0.00771618	0.00830041
54708	79690	74	105	1.58994e-06	1.85065e-06	65	101	0.00937046	0.0100175	114	184	0.00072815	0.000779611	60	99	0.0219376	0.0232981
54733	11329	74	105	1.58994e-06	1.85065e-06	65	101	0.00937046	0.0100175	106	184	0.0231224	0.0240998	62	99	0.00771618	0.00830041
54762	1029	62	105	0.0140447	0.0150406	87	101	2.47313e-12	3.13477e-12	110	184	0.00484178	0.00511387	60	99	0.0219376	0.0232981
54762	1263	61	105	0.023022	0.0244983	86	101	1.15188e-11	1.44453e-11	113	184	0.00120708	0.00128795	68	99	0.000127673	0.000143044
54762	7112	64	105	0.00466752	0.00506319	70	101	0.000410726	0.000452856	111	184	0.00311195	0.00329793	62	99	0.00771618	0.00830041
54762	9015	63	105	0.00825293	0.00889484	66	101	0.00540895	0.00581717	106	184	0.0231224	0.0240998	59	99	0.0349503	0.036885
54762	26517	62	105	0.0140447	0.0150406	81	101	1.03899e-08	1.24234e-08	109	184	0.00737886	0.00776747	61	99	0.0132626	0.0141749
54762	79172	65	105	0.00253869	0.00277197	65	101	0.00937046	0.0100175	119	184	4.19033e-05	4.56583e-05	60	99	0.0219376	0.0232981
54793	9833	66	105	0.00132689	0.00145842	73	101	3.90421e-05	4.39132e-05	104	184	0.0448459	0.0464374	62	99	0.00771618	0.00830041
54793	56731	84	105	3.92597e-12	5.01401e-12	66	101	0.00540895	0.00581717	104	184	0.0448459	0.0464374	60	99	0.0219376	0.0232981
54793	81575	71	105	2.76654e-05	3.14833e-05	66	101	0.00540895	0.00581717	106	184	0.0231224	0.0240998	60	99	0.0219376	0.0232981
54856	22974	62	105	0.0140447	0.0150406	71	101	0.00019535	0.000216795	104	184	0.0448459	0.0464374	70	99	2.30312e-05	2.61823e-05
54858	7480	67	105	0.000665913	0.000736853	73	101	3.90421e-05	4.39132e-05	105	184	0.0325163	0.0337801	59	99	0.0349503	0.036885
54872	8318	63	105	0.00825293	0.00889484	64	101	0.0156509	0.0166332	109	184	0.00737886	0.00776747	63	99	0.00431679	0.00467401
54875	88	63	105	0.00825293	0.00889484	64	101	0.0156509	0.0166332	104	184	0.0448459	0.0464374	60	99	0.0219376	0.0232981
54902	2052	64	105	0.00466752	0.00506319	82	101	2.97825e-09	3.59257e-09	108	184	0.0110176	0.0115594	62	99	0.00771618	0.00830041
54932	9493	63	105	0.00825293	0.00889484	62	101	0.0392425	0.0412253	113	184	0.00120708	0.00128795	60	99	0.0219376	0.0232981
54955	9319	62	105	0.0140447	0.0150406	76	101	2.52582e-06	2.90225e-06	106	184	0.0231224	0.0240998	67	99	0.000281104	0.000312729
54960	10024	62	105	0.0140447	0.0150406	63	101	0.0252211	0.0266484	109	184	0.00737886	0.00776747	64	99	0.00232033	0.00252904
54960	79019	62	105	0.0140447	0.0150406	66	101	0.00540895	0.00581717	127	184	1.32206e-07	1.48395e-07	59	99	0.0349503	0.036885
54960	80178	68	105	0.000320624	0.000357209	67	101	0.00300804	0.00325475	114	184	0.00072815	0.000779611	59	99	0.0349503	0.036885
54969	6790	72	105	1.11848e-05	1.28222e-05	67	101	0.00300804	0.00325475	109	184	0.00737886	0.00776747	59	99	0.0349503	0.036885
54989	6790	73	105	4.31789e-06	4.9874e-06	72	101	8.91786e-05	9.96279e-05	118	184	7.75427e-05	8.4191e-05	62	99	0.00771618	0.00830041
54995	9700	80	105	1.36332e-09	1.67029e-09	62	101	0.0392425	0.0412253	130	184	1.02348e-08	1.1624e-08	59	99	0.0349503	0.036885
54995	22950	67	105	0.000665913	0.000736853	76	101	2.52582e-06	2.90225e-06	115	184	0.00042987	0.000461845	60	99	0.0219376	0.0232981
54995	22974	71	105	2.76654e-05	3.14833e-05	74	101	1.63777e-05	1.85491e-05	105	184	0.0325163	0.0337801	65	99	0.00119731	0.00131381
55022	57172	68	105	0.000320624	0.000357209	71	101	0.00019535	0.000216795	107	184	0.0161212	0.0168581	59	99	0.0349503	0.036885
55031	3714	73	105	4.31789e-06	4.9874e-06	65	101	0.00937046	0.0100175	106	184	0.0231224	0.0240998	61	99	0.0132626	0.0141749
55032	928	63	105	0.00825293	0.00889484	66	101	0.00540895	0.00581717	107	184	0.0161212	0.0168581	60	99	0.0219376	0.0232981
55032	26133	63	105	0.00825293	0.00889484	72	101	8.91786e-05	9.96279e-05	106	184	0.0231224	0.0240998	65	99	0.00119731	0.00131381
55032	79709	75	105	5.57748e-07	6.54351e-07	67	101	0.00300804	0.00325475	108	184	0.0110176	0.0115594	60	99	0.0219376	0.0232981
55035	55661	64	105	0.00466752	0.00506319	73	101	3.90421e-05	4.39132e-05	114	184	0.00072815	0.000779611	64	99	0.00232033	0.00252904
55081	332	77	105	5.9034e-08	7.04091e-08	69	101	0.000829513	0.000908777	113	184	0.00120708	0.00128795	62	99	0.00771618	0.00830041
55081	6619	64	105	0.00466752	0.00506319	64	101	0.0156509	0.0166332	106	184	0.0231224	0.0240998	60	99	0.0219376	0.0232981
55109	10112	76	105	1.86157e-07	2.20183e-07	68	101	0.00161049	0.00175337	109	184	0.00737886	0.00776747	62	99	0.00771618	0.00830041
55124	51350	66	105	0.00132689	0.00145842	63	101	0.0252211	0.0266484	110	184	0.00484178	0.00511387	61	99	0.0132626	0.0141749
55124	79836	62	105	0.0140447	0.0150406	84	101	2.07852e-10	2.55444e-10	104	184	0.0448459	0.0464374	61	99	0.0132626	0.0141749
55125	9700	68	105	0.000320624	0.000357209	82	101	2.97825e-09	3.59257e-09	118	184	7.75427e-05	8.4191e-05	63	99	0.00431679	0.00467401
55125	83461	69	105	0.00014798	0.000166015	68	101	0.00161049	0.00175337	115	184	0.00042987	0.000461845	60	99	0.0219376	0.0232981
55145	83461	69	105	0.00014798	0.000166015	81	101	1.03899e-08	1.24234e-08	105	184	0.0325163	0.0337801	60	99	0.0219376	0.0232981
55151	141	66	105	0.00132689	0.00145842	64	101	0.0156509	0.0166332	108	184	0.0110176	0.0115594	61	99	0.0132626	0.0141749
55151	9134	67	105	0.000665913	0.000736853	62	101	0.0392425	0.0412253	106	184	0.0231224	0.0240998	66	99	0.000592616	0.000654728
55167	3226	63	105	0.00825293	0.00889484	75	101	6.57684e-06	7.50204e-06	105	184	0.0325163	0.0337801	59	99	0.0349503	0.036885
55187	5536	62	105	0.0140447	0.0150406	71	101	0.00019535	0.000216795	109	184	0.00737886	0.00776747	64	99	0.00232033	0.00252904
55194	6510	73	105	4.31789e-06	4.9874e-06	75	101	6.57684e-06	7.50204e-06	105	184	0.0325163	0.0337801	66	99	0.000592616	0.000654728
55196	3187	60	105	0.0363785	0.0384681	65	101	0.00937046	0.0100175	104	184	0.0448459	0.0464374	59	99	0.0349503	0.036885
55196	5335	69	105	0.00014798	0.000166015	76	101	2.52582e-06	2.90225e-06	105	184	0.0325163	0.0337801	63	99	0.00431679	0.00467401
55212	6857	62	105	0.0140447	0.0150406	71	101	0.00019535	0.000216795	105	184	0.0325163	0.0337801	62	99	0.00771618	0.00830041
55214	1839	76	105	1.86157e-07	2.20183e-07	62	101	0.0392425	0.0412253	109	184	0.00737886	0.00776747	64	99	0.00232033	0.00252904
55214	23457	76	105	1.86157e-07	2.20183e-07	71	101	0.00019535	0.000216795	124	184	1.36842e-06	1.51858e-06	64	99	0.00232033	0.00252904
55227	10460	74	105	1.58994e-06	1.85065e-06	65	101	0.00937046	0.0100175	117	184	0.000140311	0.000151805	59	99	0.0349503	0.036885
55240	51512	60	105	0.0363785	0.0384681	68	101	0.00161049	0.00175337	112	184	0.00195873	0.00208281	61	99	0.0132626	0.0141749
55243	843	77	105	5.9034e-08	7.04091e-08	80	101	3.44038e-08	4.07902e-08	109	184	0.00737886	0.00776747	62	99	0.00771618	0.00830041
55246	1717	76	105	1.86157e-07	2.20183e-07	67	101	0.00300804	0.00325475	105	184	0.0325163	0.0337801	66	99	0.000592616	0.000654728
55254	10024	67	105	0.000665913	0.000736853	69	101	0.000829513	0.000908777	109	184	0.00737886	0.00776747	59	99	0.0349503	0.036885
55254	80178	69	105	0.00014798	0.000166015	74	101	1.63777e-05	1.85491e-05	107	184	0.0161212	0.0168581	61	99	0.0132626	0.0141749
55259	2306	66	105	0.00132689	0.00145842	65	101	0.00937046	0.0100175	106	184	0.0231224	0.0240998	61	99	0.0132626	0.0141749
55268	10262	62	105	0.0140447	0.0150406	66	101	0.00540895	0.00581717	110	184	0.00484178	0.00511387	66	99	0.000592616	0.000654728
55268	23623	73	105	4.31789e-06	4.9874e-06	63	101	0.0252211	0.0266484	123	184	2.84251e-06	3.14271e-06	62	99	0.00771618	0.00830041
55269	11004	75	105	5.57748e-07	6.54351e-07	71	101	0.00019535	0.000216795	106	184	0.0231224	0.0240998	61	99	0.0132626	0.0141749
55270	139322	71	105	2.76654e-05	3.14833e-05	64	101	0.0156509	0.0166332	108	184	0.0110176	0.0115594	59	99	0.0349503	0.036885
55294	332	75	105	5.57748e-07	6.54351e-07	64	101	0.0156509	0.0166332	110	184	0.00484178	0.00511387	61	99	0.0132626	0.0141749
55319	1674	67	105	0.000665913	0.000736853	76	101	2.52582e-06	2.90225e-06	105	184	0.0325163	0.0337801	61	99	0.0132626	0.0141749
55319	2220	68	105	0.000320624	0.000357209	74	101	1.63777e-05	1.85491e-05	114	184	0.00072815	0.000779611	59	99	0.0349503	0.036885
55319	2488	69	105	0.00014798	0.000166015	71	101	0.00019535	0.000216795	107	184	0.0161212	0.0168581	65	99	0.00119731	0.00131381
55319	2774	63	105	0.00825293	0.00889484	78	101	3.24486e-07	3.78549e-07	104	184	0.0448459	0.0464374	61	99	0.0132626	0.0141749
55319	5080	76	105	1.86157e-07	2.20183e-07	63	101	0.0252211	0.0266484	105	184	0.0325163	0.0337801	59	99	0.0349503	0.036885
55319	6550	72	105	1.11848e-05	1.28222e-05	71	101	0.00019535	0.000216795	118	184	7.75427e-05	8.4191e-05	59	99	0.0349503	0.036885
55319	8330	71	105	2.76654e-05	3.14833e-05	66	101	0.00540895	0.00581717	104	184	0.0448459	0.0464374	61	99	0.0132626	0.0141749
55319	22999	76	105	1.86157e-07	2.20183e-07	62	101	0.0392425	0.0412253	104	184	0.0448459	0.0464374	59	99	0.0349503	0.036885
55319	23742	67	105	0.000665913	0.000736853	68	101	0.00161049	0.00175337	105	184	0.0325163	0.0337801	64	99	0.00232033	0.00252904
55319	51440	66	105	0.00132689	0.00145842	73	101	3.90421e-05	4.39132e-05	107	184	0.0161212	0.0168581	64	99	0.00232033	0.00252904
55335	2765	64	105	0.00466752	0.00506319	88	101	4.97602e-13	6.37782e-13	106	184	0.0231224	0.0240998	68	99	0.000127673	0.000143044
55347	8780	60	105	0.0363785	0.0384681	75	101	6.57684e-06	7.50204e-06	105	184	0.0325163	0.0337801	63	99	0.00431679	0.00467401
55421	10024	68	105	0.000320624	0.000357209	69	101	0.000829513	0.000908777	116	184	0.000248309	0.000267709	59	99	0.0349503	0.036885
55425	11093	73	105	4.31789e-06	4.9874e-06	66	101	0.00540895	0.00581717	106	184	0.0231224	0.0240998	64	99	0.00232033	0.00252904
55520	1510	63	105	0.00825293	0.00889484	67	101	0.00300804	0.00325475	105	184	0.0325163	0.0337801	66	99	0.000592616	0.000654728
55520	2842	70	105	6.54112e-05	7.39024e-05	68	101	0.00161049	0.00175337	111	184	0.00311195	0.00329793	61	99	0.0132626	0.0141749
55520	6698	62	105	0.0140447	0.0150406	77	101	9.26738e-07	1.07285e-06	116	184	0.000248309	0.000267709	68	99	0.000127673	0.000143044
55540	22974	69	105	0.00014798	0.000166015	63	101	0.0252211	0.0266484	113	184	0.00120708	0.00128795	62	99	0.00771618	0.00830041
55589	2766	73	105	4.31789e-06	4.9874e-06	69	101	0.000829513	0.000908777	118	184	7.75427e-05	8.4191e-05	59	99	0.0349503	0.036885
55589	7301	73	105	4.31789e-06	4.9874e-06	78	101	3.24486e-07	3.78549e-07	113	184	0.00120708	0.00128795	59	99	0.0349503	0.036885
55589	80758	79	105	5.06067e-09	6.14292e-09	74	101	1.63777e-05	1.85491e-05	109	184	0.00737886	0.00776747	64	99	0.00232033	0.00252904
55623	2810	66	105	0.00132689	0.00145842	63	101	0.0252211	0.0266484	113	184	0.00120708	0.00128795	60	99	0.0219376	0.0232981
55691	26233	69	105	0.00014798	0.000166015	68	101	0.00161049	0.00175337	104	184	0.0448459	0.0464374	63	99	0.00431679	0.00467401
55720	9088	68	105	0.000320624	0.000357209	80	101	3.44038e-08	4.07902e-08	108	184	0.0110176	0.0115594	63	99	0.00431679	0.00467401
55740	9088	74	105	1.58994e-06	1.85065e-06	76	101	2.52582e-06	2.90225e-06	121	184	1.143e-05	1.25445e-05	65	99	0.00119731	0.00131381
55769	5514	63	105	0.00825293	0.00889484	64	101	0.0156509	0.0166332	119	184	4.19033e-05	4.56583e-05	63	99	0.00431679	0.00467401
55779	55061	62	105	0.0140447	0.0150406	64	101	0.0156509	0.0166332	109	184	0.00737886	0.00776747	60	99	0.0219376	0.0232981
55786	6004	65	105	0.00253869	0.00277197	62	101	0.0392425	0.0412253	105	184	0.0325163	0.0337801	63	99	0.00431679	0.00467401
55786	10058	69	105	0.00014798	0.000166015	67	101	0.00300804	0.00325475	105	184	0.0325163	0.0337801	59	99	0.0349503	0.036885
55800	9480	69	105	0.00014798	0.000166015	66	101	0.00540895	0.00581717	118	184	7.75427e-05	8.4191e-05	62	99	0.00771618	0.00830041
55812	1515	66	105	0.00132689	0.00145842	62	101	0.0392425	0.0412253	123	184	2.84251e-06	3.14271e-06	59	99	0.0349503	0.036885
55812	5347	81	105	3.46546e-10	4.28701e-10	62	101	0.0392425	0.0412253	109	184	0.00737886	0.00776747	62	99	0.00771618	0.00830041
55812	81620	83	105	1.8644e-11	2.35492e-11	62	101	0.0392425	0.0412253	109	184	0.00737886	0.00776747	63	99	0.00431679	0.00467401
55816	54905	74	105	1.58994e-06	1.85065e-06	80	101	3.44038e-08	4.07902e-08	109	184	0.00737886	0.00776747	63	99	0.00431679	0.00467401
55818	11004	61	105	0.023022	0.0244983	72	101	8.91786e-05	9.96279e-05	110	184	0.00484178	0.00511387	60	99	0.0219376	0.0232981
55848	6240	67	105	0.000665913	0.000736853	82	101	2.97825e-09	3.59257e-09	105	184	0.0325163	0.0337801	60	99	0.0219376	0.0232981
55850	9700	70	105	6.54112e-05	7.39024e-05	75	101	6.57684e-06	7.50204e-06	124	184	1.36842e-06	1.51858e-06	60	99	0.0219376	0.0232981
55850	22974	61	105	0.023022	0.0244983	80	101	3.44038e-08	4.07902e-08	108	184	0.0110176	0.0115594	68	99	0.000127673	0.000143044
55888	3755	71	105	2.76654e-05	3.14833e-05	80	101	3.44038e-08	4.07902e-08	107	184	0.0161212	0.0168581	65	99	0.00119731	0.00131381
55888	4656	65	105	0.00253869	0.00277197	76	101	2.52582e-06	2.90225e-06	112	184	0.00195873	0.00208281	64	99	0.00232033	0.00252904
55900	29127	62	105	0.0140447	0.0150406	73	101	3.90421e-05	4.39132e-05	119	184	4.19033e-05	4.56583e-05	65	99	0.00119731	0.00131381
55909	4775	61	105	0.023022	0.0244983	70	101	0.000410726	0.000452856	105	184	0.0325163	0.0337801	66	99	0.000592616	0.000654728
55909	9401	63	105	0.00825293	0.00889484	65	101	0.00937046	0.0100175	112	184	0.00195873	0.00208281	66	99	0.000592616	0.000654728
55909	23373	70	105	6.54112e-05	7.39024e-05	66	101	0.00540895	0.00581717	105	184	0.0325163	0.0337801	59	99	0.0349503	0.036885
55915	10112	62	105	0.0140447	0.0150406	62	101	0.0392425	0.0412253	113	184	0.00120708	0.00128795	60	99	0.0219376	0.0232981
55937	10721	65	105	0.00253869	0.00277197	62	101	0.0392425	0.0412253	108	184	0.0110176	0.0115594	59	99	0.0349503	0.036885
55954	10024	83	105	1.8644e-11	2.35492e-11	67	101	0.00300804	0.00325475	110	184	0.00484178	0.00511387	59	99	0.0349503	0.036885
55970	11065	61	105	0.023022	0.0244983	86	101	1.15188e-11	1.44453e-11	107	184	0.0161212	0.0168581	61	99	0.0132626	0.0141749
55970	57446	82	105	8.29385e-11	1.03643e-10	66	101	0.00540895	0.00581717	105	184	0.0325163	0.0337801	60	99	0.0219376	0.0232981
55973	10024	66	105	0.00132689	0.00145842	73	101	3.90421e-05	4.39132e-05	104	184	0.0448459	0.0464374	64	99	0.00232033	0.00252904
55975	54478	61	105	0.023022	0.0244983	78	101	3.24486e-07	3.78549e-07	105	184	0.0325163	0.0337801	65	99	0.00119731	0.00131381
56171	56660	77	105	5.9034e-08	7.04091e-08	63	101	0.0252211	0.0266484	104	184	0.0448459	0.0464374	60	99	0.0219376	0.0232981
56267	6421	74	105	1.58994e-06	1.85065e-06	67	101	0.00300804	0.00325475	108	184	0.0110176	0.0115594	68	99	0.000127673	0.000143044
56271	2873	81	105	3.46546e-10	4.28701e-10	62	101	0.0392425	0.0412253	114	184	0.00072815	0.000779611	61	99	0.0132626	0.0141749
56271	5861	70	105	6.54112e-05	7.39024e-05	67	101	0.00300804	0.00325475	107	184	0.0161212	0.0168581	61	99	0.0132626	0.0141749
56301	993	61	105	0.023022	0.0244983	81	101	1.03899e-08	1.24234e-08	120	184	2.21368e-05	2.42074e-05	60	99	0.0219376	0.0232981
56521	1040	70	105	6.54112e-05	7.39024e-05	63	101	0.0252211	0.0266484	106	184	0.0231224	0.0240998	59	99	0.0349503	0.036885
56888	54455	69	105	0.00014798	0.000166015	71	101	0.00019535	0.000216795	106	184	0.0231224	0.0240998	61	99	0.0132626	0.0141749
56890	23547	73	105	4.31789e-06	4.9874e-06	68	101	0.00161049	0.00175337	109	184	0.00737886	0.00776747	60	99	0.0219376	0.0232981
56890	80740	68	105	0.000320624	0.000357209	65	101	0.00937046	0.0100175	104	184	0.0448459	0.0464374	65	99	0.00119731	0.00131381
56892	6059	61	105	0.023022	0.0244983	64	101	0.0156509	0.0166332	112	184	0.00195873	0.00208281	59	99	0.0349503	0.036885
56892	6576	67	105	0.000665913	0.000736853	66	101	0.00540895	0.00581717	105	184	0.0325163	0.0337801	63	99	0.00431679	0.00467401
56892	7022	73	105	4.31789e-06	4.9874e-06	62	101	0.0392425	0.0412253	106	184	0.0231224	0.0240998	62	99	0.00771618	0.00830041
56892	9184	65	105	0.00253869	0.00277197	62	101	0.0392425	0.0412253	108	184	0.0110176	0.0115594	59	99	0.0349503	0.036885
56892	10128	60	105	0.0363785	0.0384681	74	101	1.63777e-05	1.85491e-05	104	184	0.0448459	0.0464374	62	99	0.00771618	0.00830041
56892	10616	62	105	0.0140447	0.0150406	68	101	0.00161049	0.00175337	111	184	0.00311195	0.00329793	59	99	0.0349503	0.036885
56892	22977	62	105	0.0140447	0.0150406	65	101	0.00937046	0.0100175	107	184	0.0161212	0.0168581	59	99	0.0349503	0.036885
56895	79847	61	105	0.023022	0.0244983	72	101	8.91786e-05	9.96279e-05	106	184	0.0231224	0.0240998	69	99	5.54702e-05	6.25983e-05
56906	983	64	105	0.00466752	0.00506319	68	101	0.00161049	0.00175337	115	184	0.00042987	0.000461845	65	99	0.00119731	0.00131381
56906	10024	67	105	0.000665913	0.000736853	78	101	3.24486e-07	3.78549e-07	105	184	0.0325163	0.0337801	68	99	0.000127673	0.000143044
56906	11004	69	105	0.00014798	0.000166015	71	101	0.00019535	0.000216795	111	184	0.00311195	0.00329793	61	99	0.0132626	0.0141749
56906	23529	67	105	0.000665913	0.000736853	82	101	2.97825e-09	3.59257e-09	112	184	0.00195873	0.00208281	60	99	0.0219376	0.0232981
56906	79019	64	105	0.00466752	0.00506319	80	101	3.44038e-08	4.07902e-08	117	184	0.000140311	0.000151805	64	99	0.00232033	0.00252904
56944	2052	70	105	6.54112e-05	7.39024e-05	82	101	2.97825e-09	3.59257e-09	106	184	0.0231224	0.0240998	60	99	0.0219376	0.0232981
56980	81620	75	105	5.57748e-07	6.54351e-07	69	101	0.000829513	0.000908777	106	184	0.0231224	0.0240998	60	99	0.0219376	0.0232981
56995	10112	72	105	1.11848e-05	1.28222e-05	71	101	0.00019535	0.000216795	117	184	0.000140311	0.000151805	64	99	0.00232033	0.00252904
56998	9261	62	105	0.0140447	0.0150406	74	101	1.63777e-05	1.85491e-05	105	184	0.0325163	0.0337801	60	99	0.0219376	0.0232981
57045	1717	66	105	0.00132689	0.00145842	70	101	0.000410726	0.000452856	111	184	0.00311195	0.00329793	63	99	0.00431679	0.00467401
57053	3623	65	105	0.00253869	0.00277197	70	101	0.000410726	0.000452856	104	184	0.0448459	0.0464374	62	99	0.00771618	0.00830041
57053	4843	61	105	0.023022	0.0244983	82	101	2.97825e-09	3.59257e-09	108	184	0.0110176	0.0115594	60	99	0.0219376	0.0232981
57088	5360	74	105	1.58994e-06	1.85065e-06	76	101	2.52582e-06	2.90225e-06	105	184	0.0325163	0.0337801	63	99	0.00431679	0.00467401
57102	83461	74	105	1.58994e-06	1.85065e-06	73	101	3.90421e-05	4.39132e-05	106	184	0.0231224	0.0240998	65	99	0.00119731	0.00131381
57103	22974	62	105	0.0140447	0.0150406	87	101	2.47313e-12	3.13477e-12	104	184	0.0448459	0.0464374	59	99	0.0349503	0.036885
57157	3755	66	105	0.00132689	0.00145842	74	101	1.63777e-05	1.85491e-05	108	184	0.0110176	0.0115594	64	99	0.00232033	0.00252904
57157	4656	61	105	0.023022	0.0244983	83	101	8.08977e-10	9.84799e-10	116	184	0.000248309	0.000267709	62	99	0.00771618	0.00830041
57157	5046	68	105	0.000320624	0.000357209	65	101	0.00937046	0.0100175	106	184	0.0231224	0.0240998	59	99	0.0349503	0.036885
57157	55220	66	105	0.00132689	0.00145842	63	101	0.0252211	0.0266484	112	184	0.00195873	0.00208281	64	99	0.00232033	0.00252904
57157	79152	66	105	0.00132689	0.00145842	70	101	0.000410726	0.000452856	107	184	0.0161212	0.0168581	61	99	0.0132626	0.0141749
57185	4173	62	105	0.0140447	0.0150406	63	101	0.0252211	0.0266484	108	184	0.0110176	0.0115594	63	99	0.00431679	0.00467401
57209	11004	66	105	0.00132689	0.00145842	63	101	0.0252211	0.0266484	111	184	0.00311195	0.00329793	63	99	0.00431679	0.00467401
57396	8318	65	105	0.00253869	0.00277197	66	101	0.00540895	0.00581717	106	184	0.0231224	0.0240998	67	99	0.000281104	0.000312729
57396	23404	67	105	0.000665913	0.000736853	67	101	0.00300804	0.00325475	105	184	0.0325163	0.0337801	64	99	0.00232033	0.00252904
57396	64601	67	105	0.000665913	0.000736853	70	101	0.000410726	0.000452856	107	184	0.0161212	0.0168581	61	99	0.0132626	0.0141749
57403	9232	62	105	0.0140447	0.0150406	81	101	1.03899e-08	1.24234e-08	106	184	0.0231224	0.0240998	70	99	2.30312e-05	2.61823e-05
57403	9289	70	105	6.54112e-05	7.39024e-05	71	101	0.00019535	0.000216795	108	184	0.0110176	0.0115594	62	99	0.00771618	0.00830041
57493	11065	68	105	0.000320624	0.000357209	70	101	0.000410726	0.000452856	112	184	0.00195873	0.00208281	61	99	0.0132626	0.0141749
57570	1365	67	105	0.000665913	0.000736853	65	101	0.00937046	0.0100175	107	184	0.0161212	0.0168581	59	99	0.0349503	0.036885
57576	4656	67	105	0.000665913	0.000736853	65	101	0.00937046	0.0100175	114	184	0.00072815	0.000779611	64	99	0.00232033	0.00252904
57579	56660	61	105	0.023022	0.0244983	93	101	0	0	104	184	0.0448459	0.0464374	63	99	0.00431679	0.00467401
57596	993	61	105	0.023022	0.0244983	71	101	0.00019535	0.000216795	108	184	0.0110176	0.0115594	63	99	0.00431679	0.00467401
57669	55143	67	105	0.000665913	0.000736853	79	101	1.08293e-07	1.27345e-07	107	184	0.0161212	0.0168581	59	99	0.0349503	0.036885
57669	80178	78	105	1.77603e-08	2.13665e-08	64	101	0.0156509	0.0166332	113	184	0.00120708	0.00128795	63	99	0.00431679	0.00467401
57711	8914	62	105	0.0140447	0.0150406	85	101	5.0415e-11	6.25788e-11	118	184	7.75427e-05	8.4191e-05	68	99	0.000127673	0.000143044
57711	23275	73	105	4.31789e-06	4.9874e-06	65	101	0.00937046	0.0100175	111	184	0.00311195	0.00329793	60	99	0.0219376	0.0232981
57763	6576	60	105	0.0363785	0.0384681	68	101	0.00161049	0.00175337	111	184	0.00311195	0.00329793	59	99	0.0349503	0.036885
57794	22974	63	105	0.00825293	0.00889484	72	101	8.91786e-05	9.96279e-05	123	184	2.84251e-06	3.14271e-06	59	99	0.0349503	0.036885
57798	22974	65	105	0.00253869	0.00277197	65	101	0.00937046	0.0100175	119	184	4.19033e-05	4.56583e-05	59	99	0.0349503	0.036885
57827	22974	71	105	2.76654e-05	3.14833e-05	69	101	0.000829513	0.000908777	113	184	0.00120708	0.00128795	60	99	0.0219376	0.0232981
58155	23457	74	105	1.58994e-06	1.85065e-06	62	101	0.0392425	0.0412253	115	184	0.00042987	0.000461845	66	99	0.000592616	0.000654728
58517	9232	64	105	0.00466752	0.00506319	79	101	1.08293e-07	1.27345e-07	126	184	2.95193e-07	3.30073e-07	60	99	0.0219376	0.0232981
58517	27161	70	105	6.54112e-05	7.39024e-05	74	101	1.63777e-05	1.85491e-05	105	184	0.0325163	0.0337801	59	99	0.0349503	0.036885
59348	5347	60	105	0.0363785	0.0384681	79	101	1.08293e-07	1.27345e-07	112	184	0.00195873	0.00208281	59	99	0.0349503	0.036885
59348	10721	61	105	0.023022	0.0244983	66	101	0.00540895	0.00581717	106	184	0.0231224	0.0240998	66	99	0.000592616	0.000654728
60468	4656	74	105	1.58994e-06	1.85065e-06	68	101	0.00161049	0.00175337	121	184	1.143e-05	1.25445e-05	60	99	0.0219376	0.0232981
60468	6886	64	105	0.00466752	0.00506319	63	101	0.0252211	0.0266484	109	184	0.00737886	0.00776747	59	99	0.0349503	0.036885
60468	54805	66	105	0.00132689	0.00145842	64	101	0.0156509	0.0166332	108	184	0.0110176	0.0115594	60	99	0.0219376	0.0232981
60485	79019	75	105	5.57748e-07	6.54351e-07	67	101	0.00300804	0.00325475	111	184	0.00311195	0.00329793	59	99	0.0349503	0.036885
60561	83461	64	105	0.00466752	0.00506319	77	101	9.26738e-07	1.07285e-06	120	184	2.21368e-05	2.42074e-05	59	99	0.0349503	0.036885
63826	54478	67	105	0.000665913	0.000736853	80	101	3.44038e-08	4.07902e-08	113	184	0.00120708	0.00128795	59	99	0.0349503	0.036885
63827	55220	61	105	0.023022	0.0244983	74	101	1.63777e-05	1.85491e-05	105	184	0.0325163	0.0337801	65	99	0.00119731	0.00131381
63894	10460	68	105	0.000320624	0.000357209	71	101	0.00019535	0.000216795	105	184	0.0325163	0.0337801	61	99	0.0132626	0.0141749
63924	976	64	105	0.00466752	0.00506319	62	101	0.0392425	0.0412253	105	184	0.0325163	0.0337801	60	99	0.0219376	0.0232981
63924	2146	63	105	0.00825293	0.00889484	67	101	0.00300804	0.00325475	108	184	0.0110176	0.0115594	61	99	0.0132626	0.0141749
63924	2886	62	105	0.0140447	0.0150406	78	101	3.24486e-07	3.78549e-07	115	184	0.00042987	0.000461845	59	99	0.0349503	0.036885
63924	4194	69	105	0.00014798	0.000166015	67	101	0.00300804	0.00325475	115	184	0.00042987	0.000461845	60	99	0.0219376	0.0232981
63924	7050	62	105	0.0140447	0.0150406	68	101	0.00161049	0.00175337	104	184	0.0448459	0.0464374	67	99	0.000281104	0.000312729
63924	7407	66	105	0.00132689	0.00145842	63	101	0.0252211	0.0266484	105	184	0.0325163	0.0337801	60	99	0.0219376	0.0232981
63924	7564	64	105	0.00466752	0.00506319	66	101	0.00540895	0.00581717	107	184	0.0161212	0.0168581	60	99	0.0219376	0.0232981
63924	9816	71	105	2.76654e-05	3.14833e-05	64	101	0.0156509	0.0166332	112	184	0.00195873	0.00208281	59	99	0.0349503	0.036885
63924	10298	61	105	0.023022	0.0244983	79	101	1.08293e-07	1.27345e-07	106	184	0.0231224	0.0240998	63	99	0.00431679	0.00467401
63924	10948	63	105	0.00825293	0.00889484	75	101	6.57684e-06	7.50204e-06	110	184	0.00484178	0.00511387	67	99	0.000281104	0.000312729
63924	22902	66	105	0.00132689	0.00145842	64	101	0.0156509	0.0166332	115	184	0.00042987	0.000461845	59	99	0.0349503	0.036885
63924	23155	62	105	0.0140447	0.0150406	68	101	0.00161049	0.00175337	108	184	0.0110176	0.0115594	62	99	0.00771618	0.00830041
63924	23300	62	105	0.0140447	0.0150406	69	101	0.000829513	0.000908777	105	184	0.0325163	0.0337801	63	99	0.00431679	0.00467401
63924	26100	60	105	0.0363785	0.0384681	75	101	6.57684e-06	7.50204e-06	114	184	0.00072815	0.000779611	59	99	0.0349503	0.036885
63924	29888	71	105	2.76654e-05	3.14833e-05	80	101	3.44038e-08	4.07902e-08	108	184	0.0110176	0.0115594	59	99	0.0349503	0.036885
63924	51514	72	105	1.11848e-05	1.28222e-05	65	101	0.00937046	0.0100175	112	184	0.00195873	0.00208281	60	99	0.0219376	0.0232981
63924	56886	60	105	0.0363785	0.0384681	68	101	0.00161049	0.00175337	112	184	0.00195873	0.00208281	64	99	0.00232033	0.00252904
63924	79701	60	105	0.0363785	0.0384681	64	101	0.0156509	0.0166332	105	184	0.0325163	0.0337801	67	99	0.000281104	0.000312729
63924	79703	65	105	0.00253869	0.00277197	73	101	3.90421e-05	4.39132e-05	111	184	0.00311195	0.00329793	60	99	0.0219376	0.0232981
63924	80346	64	105	0.00466752	0.00506319	69	101	0.000829513	0.000908777	117	184	0.000140311	0.000151805	59	99	0.0349503	0.036885
63924	171017	80	105	1.36332e-09	1.67029e-09	62	101	0.0392425	0.0412253	110	184	0.00484178	0.00511387	59	99	0.0349503	0.036885
63924	283232	62	105	0.0140447	0.0150406	65	101	0.00937046	0.0100175	111	184	0.00311195	0.00329793	61	99	0.0132626	0.0141749
63924	283871	65	105	0.00253869	0.00277197	64	101	0.0156509	0.0166332	111	184	0.00311195	0.00329793	61	99	0.0132626	0.0141749
64081	55220	69	105	0.00014798	0.000166015	76	101	2.52582e-06	2.90225e-06	105	184	0.0325163	0.0337801	60	99	0.0219376	0.0232981
64089	1062	67	105	0.000665913	0.000736853	78	101	3.24486e-07	3.78549e-07	106	184	0.0231224	0.0240998	61	99	0.0132626	0.0141749
64089	24137	61	105	0.023022	0.0244983	88	101	4.97602e-13	6.37782e-13	115	184	0.00042987	0.000461845	60	99	0.0219376	0.0232981
64149	3925	61	105	0.023022	0.0244983	72	101	8.91786e-05	9.96279e-05	110	184	0.00484178	0.00511387	59	99	0.0349503	0.036885
64211	54905	62	105	0.0140447	0.0150406	73	101	3.90421e-05	4.39132e-05	105	184	0.0325163	0.0337801	65	99	0.00119731	0.00131381
64288	5914	73	105	4.31789e-06	4.9874e-06	66	101	0.00540895	0.00581717	104	184	0.0448459	0.0464374	62	99	0.00771618	0.00830041
64288	83451	65	105	0.00253869	0.00277197	64	101	0.0156509	0.0166332	106	184	0.0231224	0.0240998	60	99	0.0219376	0.0232981
64343	6790	75	105	5.57748e-07	6.54351e-07	79	101	1.08293e-07	1.27345e-07	108	184	0.0110176	0.0115594	60	99	0.0219376	0.0232981
64343	8365	64	105	0.00466752	0.00506319	63	101	0.0252211	0.0266484	104	184	0.0448459	0.0464374	59	99	0.0349503	0.036885
64376	9700	66	105	0.00132689	0.00145842	89	101	9.35918e-14	1.21361e-13	110	184	0.00484178	0.00511387	59	99	0.0349503	0.036885
64376	79019	75	105	5.57748e-07	6.54351e-07	69	101	0.000829513	0.000908777	110	184	0.00484178	0.00511387	61	99	0.0132626	0.0141749
64397	8192	64	105	0.00466752	0.00506319	67	101	0.00300804	0.00325475	114	184	0.00072815	0.000779611	61	99	0.0132626	0.0141749
64418	22974	70	105	6.54112e-05	7.39024e-05	72	101	8.91786e-05	9.96279e-05	115	184	0.00042987	0.000461845	62	99	0.00771618	0.00830041
64421	10024	63	105	0.00825293	0.00889484	72	101	8.91786e-05	9.96279e-05	125	184	6.43267e-07	7.16541e-07	60	99	0.0219376	0.0232981
64718	65263	62	105	0.0140447	0.0150406	65	101	0.00937046	0.0100175	106	184	0.0231224	0.0240998	60	99	0.0219376	0.0232981
64760	55143	60	105	0.0363785	0.0384681	72	101	8.91786e-05	9.96279e-05	104	184	0.0448459	0.0464374	65	99	0.00119731	0.00131381
64764	5307	64	105	0.00466752	0.00506319	62	101	0.0392425	0.0412253	105	184	0.0325163	0.0337801	61	99	0.0132626	0.0141749
64771	83461	64	105	0.00466752	0.00506319	62	101	0.0392425	0.0412253	105	184	0.0325163	0.0337801	69	99	5.54702e-05	6.25983e-05
64848	29980	63	105	0.00825293	0.00889484	66	101	0.00540895	0.00581717	113	184	0.00120708	0.00128795	62	99	0.00771618	0.00830041
64852	54972	63	105	0.00825293	0.00889484	65	101	0.00937046	0.0100175	105	184	0.0325163	0.0337801	65	99	0.00119731	0.00131381
64854	54478	63	105	0.00825293	0.00889484	70	101	0.000410726	0.000452856	109	184	0.00737886	0.00776747	60	99	0.0219376	0.0232981
64860	65082	71	105	2.76654e-05	3.14833e-05	67	101	0.00300804	0.00325475	114	184	0.00072815	0.000779611	61	99	0.0132626	0.0141749
64864	55203	69	105	0.00014798	0.000166015	70	101	0.000410726	0.000452856	111	184	0.00311195	0.00329793	59	99	0.0349503	0.036885
64895	9493	73	105	4.31789e-06	4.9874e-06	66	101	0.00540895	0.00581717	105	184	0.0325163	0.0337801	65	99	0.00119731	0.00131381
65124	9232	66	105	0.00132689	0.00145842	78	101	3.24486e-07	3.78549e-07	118	184	7.75427e-05	8.4191e-05	65	99	0.00119731	0.00131381
65124	79139	64	105	0.00466752	0.00506319	74	101	1.63777e-05	1.85491e-05	105	184	0.0325163	0.0337801	63	99	0.00431679	0.00467401
65124	79171	65	105	0.00253869	0.00277197	77	101	9.26738e-07	1.07285e-06	110	184	0.00484178	0.00511387	67	99	0.000281104	0.000312729
65989	257	74	105	1.58994e-06	1.85065e-06	70	101	0.000410726	0.000452856	111	184	0.00311195	0.00329793	59	99	0.0349503	0.036885
65989	54905	74	105	1.58994e-06	1.85065e-06	64	101	0.0156509	0.0166332	111	184	0.00311195	0.00329793	69	99	5.54702e-05	6.25983e-05
78992	22974	68	105	0.000320624	0.000357209	69	101	0.000829513	0.000908777	109	184	0.00737886	0.00776747	60	99	0.0219376	0.0232981
79026	81875	71	105	2.76654e-05	3.14833e-05	62	101	0.0392425	0.0412253	107	184	0.0161212	0.0168581	66	99	0.000592616	0.000654728
79050	9088	67	105	0.000665913	0.000736853	64	101	0.0156509	0.0166332	104	184	0.0448459	0.0464374	64	99	0.00232033	0.00252904
79072	22974	79	105	5.06067e-09	6.14292e-09	69	101	0.000829513	0.000908777	104	184	0.0448459	0.0464374	60	99	0.0219376	0.0232981
79101	9969	60	105	0.0363785	0.0384681	65	101	0.00937046	0.0100175	108	184	0.0110176	0.0115594	59	99	0.0349503	0.036885
79133	55355	62	105	0.0140447	0.0150406	72	101	8.91786e-05	9.96279e-05	106	184	0.0231224	0.0240998	59	99	0.0349503	0.036885
79411	51087	62	105	0.0140447	0.0150406	68	101	0.00161049	0.00175337	109	184	0.00737886	0.00776747	62	99	0.00771618	0.00830041
79411	83461	75	105	5.57748e-07	6.54351e-07	65	101	0.00937046	0.0100175	104	184	0.0448459	0.0464374	65	99	0.00119731	0.00131381
79583	57706	66	105	0.00132689	0.00145842	62	101	0.0392425	0.0412253	108	184	0.0110176	0.0115594	60	99	0.0219376	0.0232981
79596	5347	76	105	1.86157e-07	2.20183e-07	68	101	0.00161049	0.00175337	104	184	0.0448459	0.0464374	63	99	0.00431679	0.00467401
79642	6549	83	105	1.8644e-11	2.35492e-11	67	101	0.00300804	0.00325475	104	184	0.0448459	0.0464374	65	99	0.00119731	0.00131381
79645	3766	60	105	0.0363785	0.0384681	68	101	0.00161049	0.00175337	109	184	0.00737886	0.00776747	59	99	0.0349503	0.036885
79645	4880	61	105	0.023022	0.0244983	75	101	6.57684e-06	7.50204e-06	109	184	0.00737886	0.00776747	69	99	5.54702e-05	6.25983e-05
79645	6580	61	105	0.023022	0.0244983	75	101	6.57684e-06	7.50204e-06	110	184	0.00484178	0.00511387	65	99	0.00119731	0.00131381
79649	4656	76	105	1.86157e-07	2.20183e-07	63	101	0.0252211	0.0266484	108	184	0.0110176	0.0115594	60	99	0.0219376	0.0232981
79650	8318	66	105	0.00132689	0.00145842	63	101	0.0252211	0.0266484	120	184	2.21368e-05	2.42074e-05	61	99	0.0132626	0.0141749
79671	10460	69	105	0.00014798	0.000166015	74	101	1.63777e-05	1.85491e-05	107	184	0.0161212	0.0168581	66	99	0.000592616	0.000654728
79677	83461	69	105	0.00014798	0.000166015	72	101	8.91786e-05	9.96279e-05	117	184	0.000140311	0.000151805	64	99	0.00232033	0.00252904
79682	24137	77	105	5.9034e-08	7.04091e-08	64	101	0.0156509	0.0166332	106	184	0.0231224	0.0240998	60	99	0.0219376	0.0232981
79685	8914	70	105	6.54112e-05	7.39024e-05	63	101	0.0252211	0.0266484	108	184	0.0110176	0.0115594	60	99	0.0219376	0.0232981
79689	1263	63	105	0.00825293	0.00889484	68	101	0.00161049	0.00175337	105	184	0.0325163	0.0337801	64	99	0.00232033	0.00252904
79689	2048	68	105	0.000320624	0.000357209	63	101	0.0252211	0.0266484	108	184	0.0110176	0.0115594	61	99	0.0132626	0.0141749
79694	6857	61	105	0.023022	0.0244983	74	101	1.63777e-05	1.85491e-05	105	184	0.0325163	0.0337801	60	99	0.0219376	0.0232981
79728	22974	81	105	3.46546e-10	4.28701e-10	69	101	0.000829513	0.000908777	109	184	0.00737886	0.00776747	63	99	0.00431679	0.00467401
79734	5864	67	105	0.000665913	0.000736853	85	101	5.0415e-11	6.25788e-11	108	184	0.0110176	0.0115594	62	99	0.00771618	0.00830041
79734	27158	70	105	6.54112e-05	7.39024e-05	66	101	0.00540895	0.00581717	109	184	0.00737886	0.00776747	61	99	0.0132626	0.0141749
79753	10112	71	105	2.76654e-05	3.14833e-05	63	101	0.0252211	0.0266484	104	184	0.0448459	0.0464374	72	99	3.45035e-06	3.98241e-06
79758	641	60	105	0.0363785	0.0384681	70	101	0.000410726	0.000452856	105	184	0.0325163	0.0337801	60	99	0.0219376	0.0232981
79830	8318	68	105	0.000320624	0.000357209	75	101	6.57684e-06	7.50204e-06	108	184	0.0110176	0.0115594	60	99	0.0219376	0.0232981
79838	9088	60	105	0.0363785	0.0384681	76	101	2.52582e-06	2.90225e-06	107	184	0.0161212	0.0168581	63	99	0.00431679	0.00467401
79842	332	66	105	0.00132689	0.00145842	65	101	0.00937046	0.0100175	115	184	0.00042987	0.000461845	60	99	0.0219376	0.0232981
79846	8498	62	105	0.0140447	0.0150406	80	101	3.44038e-08	4.07902e-08	121	184	1.143e-05	1.25445e-05	61	99	0.0132626	0.0141749
79846	10460	63	105	0.00825293	0.00889484	75	101	6.57684e-06	7.50204e-06	119	184	4.19033e-05	4.56583e-05	60	99	0.0219376	0.0232981
79846	10712	75	105	5.57748e-07	6.54351e-07	68	101	0.00161049	0.00175337	107	184	0.0161212	0.0168581	68	99	0.000127673	0.000143044
79846	27229	60	105	0.0363785	0.0384681	73	101	3.90421e-05	4.39132e-05	124	184	1.36842e-06	1.51858e-06	61	99	0.0132626	0.0141749
79846	55143	68	105	0.000320624	0.000357209	64	101	0.0156509	0.0166332	126	184	2.95193e-07	3.30073e-07	61	99	0.0132626	0.0141749
79846	55844	64	105	0.00466752	0.00506319	62	101	0.0392425	0.0412253	124	184	1.36842e-06	1.51858e-06	61	99	0.0132626	0.0141749
79846	56731	68	105	0.000320624	0.000357209	68	101	0.00161049	0.00175337	105	184	0.0325163	0.0337801	75	99	1.38329e-07	1.63559e-07
79862	55355	69	105	0.00014798	0.000166015	69	101	0.000829513	0.000908777	109	184	0.00737886	0.00776747	64	99	0.00232033	0.00252904
79867	54905	75	105	5.57748e-07	6.54351e-07	62	101	0.0392425	0.0412253	104	184	0.0448459	0.0464374	59	99	0.0349503	0.036885
79868	891	64	105	0.00466752	0.00506319	67	101	0.00300804	0.00325475	109	184	0.00737886	0.00776747	69	99	5.54702e-05	6.25983e-05
79868	3297	72	105	1.11848e-05	1.28222e-05	64	101	0.0156509	0.0166332	110	184	0.00484178	0.00511387	67	99	0.000281104	0.000312729
79868	9700	75	105	5.57748e-07	6.54351e-07	74	101	1.63777e-05	1.85491e-05	106	184	0.0231224	0.0240998	67	99	0.000281104	0.000312729
79868	51571	73	105	4.31789e-06	4.9874e-06	69	101	0.000829513	0.000908777	107	184	0.0161212	0.0168581	61	99	0.0132626	0.0141749
79868	55723	74	105	1.58994e-06	1.85065e-06	71	101	0.00019535	0.000216795	110	184	0.00484178	0.00511387	64	99	0.00232033	0.00252904
79868	83461	81	105	3.46546e-10	4.28701e-10	63	101	0.0252211	0.0266484	114	184	0.00072815	0.000779611	61	99	0.0132626	0.0141749
79882	9088	60	105	0.0363785	0.0384681	88	101	4.97602e-13	6.37782e-13	110	184	0.00484178	0.00511387	71	99	9.1288e-06	1.04559e-05
79886	54913	64	105	0.00466752	0.00506319	85	101	5.0415e-11	6.25788e-11	104	184	0.0448459	0.0464374	59	99	0.0349503	0.036885
79892	2305	61	105	0.023022	0.0244983	78	101	3.24486e-07	3.78549e-07	105	184	0.0325163	0.0337801	60	99	0.0219376	0.0232981
79901	201254	61	105	0.023022	0.0244983	68	101	0.00161049	0.00175337	119	184	4.19033e-05	4.56583e-05	61	99	0.0132626	0.0141749
79906	6343	65	105	0.00253869	0.00277197	67	101	0.00300804	0.00325475	106	184	0.0231224	0.0240998	62	99	0.00771618	0.00830041
79915	54905	61	105	0.023022	0.0244983	62	101	0.0392425	0.0412253	107	184	0.0161212	0.0168581	59	99	0.0349503	0.036885
79954	51512	67	105	0.000665913	0.000736853	84	101	2.07852e-10	2.55444e-10	105	184	0.0325163	0.0337801	67	99	0.000281104	0.000312729
79971	150094	61	105	0.023022	0.0244983	72	101	8.91786e-05	9.96279e-05	108	184	0.0110176	0.0115594	61	99	0.0132626	0.0141749
79971	196483	65	105	0.00253869	0.00277197	64	101	0.0156509	0.0166332	111	184	0.00311195	0.00329793	59	99	0.0349503	0.036885
80007	24137	62	105	0.0140447	0.0150406	65	101	0.00937046	0.0100175	106	184	0.0231224	0.0240998	64	99	0.00232033	0.00252904
80010	22974	80	105	1.36332e-09	1.67029e-09	66	101	0.00540895	0.00581717	107	184	0.0161212	0.0168581	65	99	0.00119731	0.00131381
80013	7298	64	105	0.00466752	0.00506319	68	101	0.00161049	0.00175337	107	184	0.0161212	0.0168581	61	99	0.0132626	0.0141749
80055	105	60	105	0.0363785	0.0384681	75	101	6.57684e-06	7.50204e-06	119	184	4.19033e-05	4.56583e-05	60	99	0.0219376	0.0232981
80055	3805	67	105	0.000665913	0.000736853	64	101	0.0156509	0.0166332	118	184	7.75427e-05	8.4191e-05	61	99	0.0132626	0.0141749
80055	64096	71	105	2.76654e-05	3.14833e-05	63	101	0.0252211	0.0266484	104	184	0.0448459	0.0464374	59	99	0.0349503	0.036885
80110	9212	61	105	0.023022	0.0244983	73	101	3.90421e-05	4.39132e-05	120	184	2.21368e-05	2.42074e-05	60	99	0.0219376	0.0232981
80127	10460	75	105	5.57748e-07	6.54351e-07	66	101	0.00540895	0.00581717	109	184	0.00737886	0.00776747	62	99	0.00771618	0.00830041
80143	55220	60	105	0.0363785	0.0384681	89	101	9.35918e-14	1.21361e-13	113	184	0.00120708	0.00128795	60	99	0.0219376	0.0232981
80205	7153	68	105	0.000320624	0.000357209	62	101	0.0392425	0.0412253	116	184	0.000248309	0.000267709	64	99	0.00232033	0.00252904
80209	22974	66	105	0.00132689	0.00145842	73	101	3.90421e-05	4.39132e-05	118	184	7.75427e-05	8.4191e-05	64	99	0.00232033	0.00252904
80235	65010	64	105	0.00466752	0.00506319	70	101	0.000410726	0.000452856	106	184	0.0231224	0.0240998	60	99	0.0219376	0.0232981
80254	54478	71	105	2.76654e-05	3.14833e-05	68	101	0.00161049	0.00175337	105	184	0.0325163	0.0337801	66	99	0.000592616	0.000654728
80310	3297	73	105	4.31789e-06	4.9874e-06	70	101	0.000410726	0.000452856	112	184	0.00195873	0.00208281	59	99	0.0349503	0.036885
80317	344	69	105	0.00014798	0.000166015	63	101	0.0252211	0.0266484	104	184	0.0448459	0.0464374	59	99	0.0349503	0.036885
80345	8914	68	105	0.000320624	0.000357209	73	101	3.90421e-05	4.39132e-05	110	184	0.00484178	0.00511387	60	99	0.0219376	0.0232981
80724	9212	71	105	2.76654e-05	3.14833e-05	68	101	0.00161049	0.00175337	114	184	0.00072815	0.000779611	59	99	0.0349503	0.036885
80746	54972	64	105	0.00466752	0.00506319	65	101	0.00937046	0.0100175	109	184	0.00737886	0.00776747	65	99	0.00119731	0.00131381
80775	6790	64	105	0.00466752	0.00506319	70	101	0.000410726	0.000452856	109	184	0.00737886	0.00776747	60	99	0.0219376	0.0232981
80776	10024	66	105	0.00132689	0.00145842	74	101	1.63777e-05	1.85491e-05	119	184	4.19033e-05	4.56583e-05	59	99	0.0349503	0.036885
80823	3925	63	105	0.00825293	0.00889484	75	101	6.57684e-06	7.50204e-06	111	184	0.00311195	0.00329793	62	99	0.00771618	0.00830041
80823	23080	63	105	0.00825293	0.00889484	74	101	1.63777e-05	1.85491e-05	104	184	0.0448459	0.0464374	64	99	0.00232033	0.00252904
80823	56992	70	105	6.54112e-05	7.39024e-05	70	101	0.000410726	0.000452856	108	184	0.0110176	0.0115594	63	99	0.00431679	0.00467401
80975	51052	72	105	1.11848e-05	1.28222e-05	70	101	0.000410726	0.000452856	105	184	0.0325163	0.0337801	67	99	0.000281104	0.000312729
81493	9319	64	105	0.00466752	0.00506319	70	101	0.000410726	0.000452856	113	184	0.00120708	0.00128795	61	99	0.0132626	0.0141749
81493	10112	71	105	2.76654e-05	3.14833e-05	68	101	0.00161049	0.00175337	104	184	0.0448459	0.0464374	66	99	0.000592616	0.000654728
81537	2671	69	105	0.00014798	0.000166015	73	101	3.90421e-05	4.39132e-05	108	184	0.0110176	0.0115594	59	99	0.0349503	0.036885
81545	22974	64	105	0.00466752	0.00506319	75	101	6.57684e-06	7.50204e-06	105	184	0.0325163	0.0337801	65	99	0.00119731	0.00131381
81563	833	62	105	0.0140447	0.0150406	79	101	1.08293e-07	1.27345e-07	108	184	0.0110176	0.0115594	60	99	0.0219376	0.0232981
81563	955	76	105	1.86157e-07	2.20183e-07	76	101	2.52582e-06	2.90225e-06	108	184	0.0110176	0.0115594	60	99	0.0219376	0.0232981
81563	2064	64	105	0.00466752	0.00506319	72	101	8.91786e-05	9.96279e-05	113	184	0.00120708	0.00128795	60	99	0.0219376	0.0232981
81563	2125	84	105	3.92597e-12	5.01401e-12	65	101	0.00937046	0.0100175	104	184	0.0448459	0.0464374	74	99	4.253e-07	4.98738e-07
81563	5051	68	105	0.000320624	0.000357209	63	101	0.0252211	0.0266484	112	184	0.00195873	0.00208281	61	99	0.0132626	0.0141749
81563	5433	81	105	3.46546e-10	4.28701e-10	64	101	0.0156509	0.0166332	116	184	0.000248309	0.000267709	60	99	0.0219376	0.0232981
81563	9260	79	105	5.06067e-09	6.14292e-09	68	101	0.00161049	0.00175337	111	184	0.00311195	0.00329793	60	99	0.0219376	0.0232981
81563	10059	60	105	0.0363785	0.0384681	62	101	0.0392425	0.0412253	108	184	0.0110176	0.0115594	62	99	0.00771618	0.00830041
81563	10112	72	105	1.11848e-05	1.28222e-05	63	101	0.0252211	0.0266484	117	184	0.000140311	0.000151805	64	99	0.00232033	0.00252904
81563	23468	66	105	0.00132689	0.00145842	73	101	3.90421e-05	4.39132e-05	114	184	0.00072815	0.000779611	59	99	0.0349503	0.036885
81563	28992	80	105	1.36332e-09	1.67029e-09	67	101	0.00300804	0.00325475	111	184	0.00311195	0.00329793	59	99	0.0349503	0.036885
81606	6241	63	105	0.00825293	0.00889484	65	101	0.00937046	0.0100175	127	184	1.32206e-07	1.48395e-07	62	99	0.00771618	0.00830041
81688	83696	73	105	4.31789e-06	4.9874e-06	62	101	0.0392425	0.0412253	104	184	0.0448459	0.0464374	70	99	2.30312e-05	2.61823e-05
81790	3297	61	105	0.023022	0.0244983	74	101	1.63777e-05	1.85491e-05	104	184	0.0448459	0.0464374	59	99	0.0349503	0.036885
81850	56269	63	105	0.00825293	0.00889484	78	101	3.24486e-07	3.78549e-07	107	184	0.0161212	0.0168581	62	99	0.00771618	0.00830041
81888	22974	70	105	6.54112e-05	7.39024e-05	70	101	0.000410726	0.000452856	106	184	0.0231224	0.0240998	68	99	0.000127673	0.000143044
83450	201191	69	105	0.00014798	0.000166015	66	101	0.00540895	0.00581717	106	184	0.0231224	0.0240998	61	99	0.0132626	0.0141749
83452	983	67	105	0.000665913	0.000736853	71	101	0.00019535	0.000216795	110	184	0.00484178	0.00511387	63	99	0.00431679	0.00467401
83452	11004	71	105	2.76654e-05	3.14833e-05	75	101	6.57684e-06	7.50204e-06	105	184	0.0325163	0.0337801	61	99	0.0132626	0.0141749
83452	79019	63	105	0.00825293	0.00889484	84	101	2.07852e-10	2.55444e-10	108	184	0.0110176	0.0115594	59	99	0.0349503	0.036885
83480	9833	62	105	0.0140447	0.0150406	66	101	0.00540895	0.00581717	105	184	0.0325163	0.0337801	61	99	0.0132626	0.0141749
83604	8694	63	105	0.00825293	0.00889484	71	101	0.00019535	0.000216795	105	184	0.0325163	0.0337801	60	99	0.0219376	0.0232981
83604	10456	63	105	0.00825293	0.00889484	74	101	1.63777e-05	1.85491e-05	107	184	0.0161212	0.0168581	61	99	0.0132626	0.0141749
83737	6790	64	105	0.00466752	0.00506319	80	101	3.44038e-08	4.07902e-08	105	184	0.0325163	0.0337801	66	99	0.000592616	0.000654728
84172	9401	63	105	0.00825293	0.00889484	65	101	0.00937046	0.0100175	104	184	0.0448459	0.0464374	60	99	0.0219376	0.0232981
84196	51514	68	105	0.000320624	0.000357209	64	101	0.0156509	0.0166332	112	184	0.00195873	0.00208281	61	99	0.0132626	0.0141749
84436	1302	61	105	0.023022	0.0244983	92	101	4.44089e-16	5.98775e-16	106	184	0.0231224	0.0240998	64	99	0.00232033	0.00252904
84436	3882	76	105	1.86157e-07	2.20183e-07	64	101	0.0156509	0.0166332	105	184	0.0325163	0.0337801	61	99	0.0132626	0.0141749
84747	9136	71	105	2.76654e-05	3.14833e-05	71	101	0.00019535	0.000216795	113	184	0.00120708	0.00128795	62	99	0.00771618	0.00830041
84890	4860	65	105	0.00253869	0.00277197	76	101	2.52582e-06	2.90225e-06	106	184	0.0231224	0.0240998	62	99	0.00771618	0.00830041
84890	65265	70	105	6.54112e-05	7.39024e-05	68	101	0.00161049	0.00175337	105	184	0.0325163	0.0337801	62	99	0.00771618	0.00830041
84942	11065	61	105	0.023022	0.0244983	74	101	1.63777e-05	1.85491e-05	105	184	0.0325163	0.0337801	62	99	0.00771618	0.00830041
85458	24137	66	105	0.00132689	0.00145842	68	101	0.00161049	0.00175337	120	184	2.21368e-05	2.42074e-05	60	99	0.0219376	0.0232981
89944	9088	68	105	0.000320624	0.000357209	71	101	0.00019535	0.000216795	109	184	0.00737886	0.00776747	62	99	0.00771618	0.00830041
90233	993	63	105	0.00825293	0.00889484	67	101	0.00300804	0.00325475	111	184	0.00311195	0.00329793	59	99	0.0349503	0.036885
90411	10460	60	105	0.0363785	0.0384681	93	101	0	0	105	184	0.0325163	0.0337801	62	99	0.00771618	0.00830041
90411	55157	60	105	0.0363785	0.0384681	66	101	0.00540895	0.00581717	104	184	0.0448459	0.0464374	60	99	0.0219376	0.0232981
90411	80178	83	105	1.8644e-11	2.35492e-11	66	101	0.00540895	0.00581717	110	184	0.00484178	0.00511387	60	99	0.0219376	0.0232981
90627	55176	74	105	1.58994e-06	1.85065e-06	78	101	3.24486e-07	3.78549e-07	115	184	0.00042987	0.000461845	62	99	0.00771618	0.00830041
90627	57591	73	105	4.31789e-06	4.9874e-06	71	101	0.00019535	0.000216795	113	184	0.00120708	0.00128795	60	99	0.0219376	0.0232981
90865	27334	64	105	0.00466752	0.00506319	81	101	1.03899e-08	1.24234e-08	104	184	0.0448459	0.0464374	59	99	0.0349503	0.036885
91754	5864	76	105	1.86157e-07	2.20183e-07	67	101	0.00300804	0.00325475	104	184	0.0448459	0.0464374	59	99	0.0349503	0.036885
93436	9700	75	105	5.57748e-07	6.54351e-07	70	101	0.000410726	0.000452856	115	184	0.00042987	0.000461845	61	99	0.0132626	0.0141749
94104	9700	70	105	6.54112e-05	7.39024e-05	76	101	2.52582e-06	2.90225e-06	111	184	0.00311195	0.00329793	61	99	0.0132626	0.0141749
94134	1889	67	105	0.000665913	0.000736853	68	101	0.00161049	0.00175337	108	184	0.0110176	0.0115594	60	99	0.0219376	0.0232981
94134	9088	87	105	2.39808e-14	3.17478e-14	63	101	0.0252211	0.0266484	124	184	1.36842e-06	1.51858e-06	60	99	0.0219376	0.0232981
112399	6712	76	105	1.86157e-07	2.20183e-07	62	101	0.0392425	0.0412253	108	184	0.0110176	0.0115594	60	99	0.0219376	0.0232981
112399	55223	63	105	0.00825293	0.00889484	74	101	1.63777e-05	1.85491e-05	106	184	0.0231224	0.0240998	59	99	0.0349503	0.036885
114625	2305	67	105	0.000665913	0.000736853	83	101	8.08977e-10	9.84799e-10	109	184	0.00737886	0.00776747	64	99	0.00232033	0.00252904
114625	51512	61	105	0.023022	0.0244983	81	101	1.03899e-08	1.24234e-08	110	184	0.00484178	0.00511387	68	99	0.000127673	0.000143044
114885	5724	65	105	0.00253869	0.00277197	64	101	0.0156509	0.0166332	107	184	0.0161212	0.0168581	63	99	0.00431679	0.00467401
115708	3297	60	105	0.0363785	0.0384681	66	101	0.00540895	0.00581717	106	184	0.0231224	0.0240998	64	99	0.00232033	0.00252904
117178	1029	67	105	0.000665913	0.000736853	64	101	0.0156509	0.0166332	117	184	0.000140311	0.000151805	61	99	0.0132626	0.0141749
117178	1263	64	105	0.00466752	0.00506319	71	101	0.00019535	0.000216795	133	184	6.29973e-10	7.24252e-10	61	99	0.0132626	0.0141749
117178	5163	71	105	2.76654e-05	3.14833e-05	67	101	0.00300804	0.00325475	112	184	0.00195873	0.00208281	66	99	0.000592616	0.000654728
117178	7425	75	105	5.57748e-07	6.54351e-07	64	101	0.0156509	0.0166332	113	184	0.00120708	0.00128795	63	99	0.00431679	0.00467401
117178	9618	69	105	0.00014798	0.000166015	66	101	0.00540895	0.00581717	109	184	0.00737886	0.00776747	65	99	0.00119731	0.00131381
117178	55061	64	105	0.00466752	0.00506319	73	101	3.90421e-05	4.39132e-05	118	184	7.75427e-05	8.4191e-05	65	99	0.00119731	0.00131381
118491	7301	64	105	0.00466752	0.00506319	69	101	0.000829513	0.000908777	104	184	0.0448459	0.0464374	59	99	0.0349503	0.036885
118987	332	68	105	0.000320624	0.000357209	71	101	0.00019535	0.000216795	113	184	0.00120708	0.00128795	61	99	0.0132626	0.0141749
120526	10112	60	105	0.0363785	0.0384681	72	101	8.91786e-05	9.96279e-05	113	184	0.00120708	0.00128795	61	99	0.0132626	0.0141749
123872	55176	69	105	0.00014798	0.000166015	63	101	0.0252211	0.0266484	106	184	0.0231224	0.0240998	60	99	0.0219376	0.0232981
124801	22974	76	105	1.86157e-07	2.20183e-07	71	101	0.00019535	0.000216795	107	184	0.0161212	0.0168581	62	99	0.00771618	0.00830041
126017	9156	61	105	0.023022	0.0244983	70	101	0.000410726	0.000452856	106	184	0.0231224	0.0240998	64	99	0.00232033	0.00252904
128553	6790	61	105	0.023022	0.0244983	78	101	3.24486e-07	3.78549e-07	108	184	0.0110176	0.0115594	61	99	0.0132626	0.0141749
131566	4242	65	105	0.00253869	0.00277197	64	101	0.0156509	0.0166332	106	184	0.0231224	0.0240998	62	99	0.00771618	0.00830041
131566	6790	67	105	0.000665913	0.000736853	73	101	3.90421e-05	4.39132e-05	113	184	0.00120708	0.00128795	68	99	0.000127673	0.000143044
131566	7296	72	105	1.11848e-05	1.28222e-05	67	101	0.00300804	0.00325475	110	184	0.00484178	0.00511387	62	99	0.00771618	0.00830041
131566	23511	74	105	1.58994e-06	1.85065e-06	73	101	3.90421e-05	4.39132e-05	117	184	0.000140311	0.000151805	62	99	0.00771618	0.00830041
131566	55308	67	105	0.000665913	0.000736853	77	101	9.26738e-07	1.07285e-06	123	184	2.84251e-06	3.14271e-06	59	99	0.0349503	0.036885
131566	80775	64	105	0.00466752	0.00506319	76	101	2.52582e-06	2.90225e-06	107	184	0.0161212	0.0168581	66	99	0.000592616	0.000654728
133619	1365	67	105	0.000665913	0.000736853	64	101	0.0156509	0.0166332	104	184	0.0448459	0.0464374	65	99	0.00119731	0.00131381
138162	10131	63	105	0.00825293	0.00889484	64	101	0.0156509	0.0166332	104	184	0.0448459	0.0464374	60	99	0.0219376	0.0232981
140459	51514	63	105	0.00825293	0.00889484	65	101	0.00937046	0.0100175	111	184	0.00311195	0.00329793	59	99	0.0349503	0.036885
146562	23334	66	105	0.00132689	0.00145842	74	101	1.63777e-05	1.85491e-05	112	184	0.00195873	0.00208281	59	99	0.0349503	0.036885
151011	6241	62	105	0.0140447	0.0150406	73	101	3.90421e-05	4.39132e-05	134	184	2.36028e-10	2.72483e-10	62	99	0.00771618	0.00830041
151011	23194	63	105	0.00825293	0.00889484	74	101	1.63777e-05	1.85491e-05	104	184	0.0448459	0.0464374	64	99	0.00232033	0.00252904
151050	4295	65	105	0.00253869	0.00277197	64	101	0.0156509	0.0166332	113	184	0.00120708	0.00128795	59	99	0.0349503	0.036885
152006	22974	61	105	0.023022	0.0244983	82	101	2.97825e-09	3.59257e-09	114	184	0.00072815	0.000779611	61	99	0.0132626	0.0141749
154661	6036	60	105	0.0363785	0.0384681	64	101	0.0156509	0.0166332	104	184	0.0448459	0.0464374	62	99	0.00771618	0.00830041
157869	923	68	105	0.000320624	0.000357209	71	101	0.00019535	0.000216795	108	184	0.0110176	0.0115594	62	99	0.00771618	0.00830041
157869	978	71	105	2.76654e-05	3.14833e-05	68	101	0.00161049	0.00175337	120	184	2.21368e-05	2.42074e-05	60	99	0.0219376	0.0232981
157869	7014	62	105	0.0140447	0.0150406	77	101	9.26738e-07	1.07285e-06	104	184	0.0448459	0.0464374	61	99	0.0132626	0.0141749
157869	79944	63	105	0.00825293	0.00889484	76	101	2.52582e-06	2.90225e-06	110	184	0.00484178	0.00511387	59	99	0.0349503	0.036885
167227	2932	62	105	0.0140447	0.0150406	81	101	1.03899e-08	1.24234e-08	107	184	0.0161212	0.0168581	60	99	0.0219376	0.0232981
196441	332	71	105	2.76654e-05	3.14833e-05	63	101	0.0252211	0.0266484	110	184	0.00484178	0.00511387	61	99	0.0132626	0.0141749
196740	4656	63	105	0.00825293	0.00889484	73	101	3.90421e-05	4.39132e-05	105	184	0.0325163	0.0337801	63	99	0.00431679	0.00467401
196993	651	64	105	0.00466752	0.00506319	75	101	6.57684e-06	7.50204e-06	105	184	0.0325163	0.0337801	59	99	0.0349503	0.036885
199870	2583	70	105	6.54112e-05	7.39024e-05	66	101	0.00540895	0.00581717	109	184	0.00737886	0.00776747	61	99	0.0132626	0.0141749
199870	6698	72	105	1.11848e-05	1.28222e-05	73	101	3.90421e-05	4.39132e-05	115	184	0.00042987	0.000461845	60	99	0.0219376	0.0232981
201229	24137	69	105	0.00014798	0.000166015	64	101	0.0156509	0.0166332	107	184	0.0161212	0.0168581	68	99	0.000127673	0.000143044
201229	51512	79	105	5.06067e-09	6.14292e-09	65	101	0.00937046	0.0100175	104	184	0.0448459	0.0464374	65	99	0.00119731	0.00131381
206358	2305	70	105	6.54112e-05	7.39024e-05	62	101	0.0392425	0.0412253	108	184	0.0110176	0.0115594	64	99	0.00232033	0.00252904
221154	2907	69	105	0.00014798	0.000166015	77	101	9.26738e-07	1.07285e-06	106	184	0.0231224	0.0240998	66	99	0.000592616	0.000654728
221830	79000	66	105	0.00132689	0.00145842	68	101	0.00161049	0.00175337	109	184	0.00737886	0.00776747	60	99	0.0219376	0.0232981
221981	3559	61	105	0.023022	0.0244983	76	101	2.52582e-06	2.90225e-06	105	184	0.0325163	0.0337801	59	99	0.0349503	0.036885
259217	9493	61	105	0.023022	0.0244983	67	101	0.00300804	0.00325475	106	184	0.0231224	0.0240998	67	99	0.000281104	0.000312729
284325	22974	70	105	6.54112e-05	7.39024e-05	62	101	0.0392425	0.0412253	105	184	0.0325163	0.0337801	66	99	0.000592616	0.000654728
285203	3954	60	105	0.0363785	0.0384681	79	101	1.08293e-07	1.27345e-07	112	184	0.00195873	0.00208281	60	99	0.0219376	0.0232981
285203	24137	78	105	1.77603e-08	2.13665e-08	66	101	0.00540895	0.00581717	120	184	2.21368e-05	2.42074e-05	62	99	0.00771618	0.00830041
285203	55765	67	105	0.000665913	0.000736853	65	101	0.00937046	0.0100175	105	184	0.0325163	0.0337801	63	99	0.00431679	0.00467401
286148	10112	81	105	3.46546e-10	4.28701e-10	65	101	0.00937046	0.0100175	106	184	0.0231224	0.0240998	61	99	0.0132626	0.0141749
373156	9368	66	105	0.00132689	0.00145842	78	101	3.24486e-07	3.78549e-07	104	184	0.0448459	0.0464374	64	99	0.00232033	0.00252904
387032	10460	64	105	0.00466752	0.00506319	79	101	1.08293e-07	1.27345e-07	109	184	0.00737886	0.00776747	60	99	0.0219376	0.0232981
399979	8318	64	105	0.00466752	0.00506319	65	101	0.00937046	0.0100175	109	184	0.00737886	0.00776747	66	99	0.000592616	0.000654728
474344	891	66	105	0.00132689	0.00145842	67	101	0.00300804	0.00325475	110	184	0.00484178	0.00511387	60	99	0.0219376	0.0232981
644096	3833	73	105	4.31789e-06	4.9874e-06	64	101	0.0156509	0.0166332	105	184	0.0325163	0.0337801	59	99	0.0349503	0.036885
Note:* Gene A has a higher expression level than Gene B in non-metastatic breast tissues
